# Supplementary material for: Gender disparities in high-quality dermatology research: a descriptive bibliometric study on scientific authorships
Source: PubMed Central journal article supplement — BMJ Open. 2018 Apr 13;8(4):e020089. doi: 10.1136/bmjopen-2017-020089 (PMC5905741; doi:10.1136/bmjopen-2017-020089), 2018-04-13
Supplement: bmjopen-2017-020089.draft_revisions.pdf [file bmjopen-2017-020089.draft_revisions.pdf]

# BMJ Open

BMJ Open is committed to open peer review. As part of this commitment we make the peer review history of every article we publish publicly available.

When an article is published we post the peer reviewers' comments and the authors' responses online. We also post the versions of the paper that were used during peer review. These are the versions that the peer review comments apply to.

The versions of the paper that follow are the versions that were submitted during the peer review process. They are not the versions of record or the final published versions. They should not be cited or distributed as the published version of this manuscript.

BMJ Open is an open access journal and the full, final, typeset and author-corrected version of record of the manuscript is available on our site with no access controls, subscription charges or pay-per-view fees (<http://bmjopen.bmj.com>).

If you have any questions on BMJ Open's open peer review process please email [info.bmjopen@bmj.com](mailto:info.bmjopen@bmj.com)

# BMJ Open

## Gender disparities in high-quality dermatology research – a study on scientific authorships

|                                 |                                                                                                                                                                                                                                                                                                                                                                                                                                                                                                                                                                                                                                                                                                                                                                                                                                                         |
|---------------------------------|---------------------------------------------------------------------------------------------------------------------------------------------------------------------------------------------------------------------------------------------------------------------------------------------------------------------------------------------------------------------------------------------------------------------------------------------------------------------------------------------------------------------------------------------------------------------------------------------------------------------------------------------------------------------------------------------------------------------------------------------------------------------------------------------------------------------------------------------------------|
| Journal:                        | <i>BMJ Open</i>                                                                                                                                                                                                                                                                                                                                                                                                                                                                                                                                                                                                                                                                                                                                                                                                                                         |
| Manuscript ID                   | bmjopen-2017-020089                                                                                                                                                                                                                                                                                                                                                                                                                                                                                                                                                                                                                                                                                                                                                                                                                                     |
| Article Type:                   | Research                                                                                                                                                                                                                                                                                                                                                                                                                                                                                                                                                                                                                                                                                                                                                                                                                                                |
| Date Submitted by the Author:   | 23-Oct-2017                                                                                                                                                                                                                                                                                                                                                                                                                                                                                                                                                                                                                                                                                                                                                                                                                                             |
| Complete List of Authors:       | Bendels, Michael; Goethe-Universität Frankfurt am Main, Institute of Occupational Medicine, Social Medicine and Environmental Medicine<br>Dietz, Michelle; Goethe-Universität Frankfurt am Main, Institute of Occupational Medicine, Social Medicine and Environmental Medicine<br>Brüggmann, Dörthe; Goethe-Universität Frankfurt am Main, Institute of Occupational Medicine, Social Medicine and Environmental Medicine<br>Oremek, Gerhard; Goethe-Universität Frankfurt am Main, Institute of Occupational Medicine, Social Medicine and Environmental Medicine<br>Schöffel, Norman; Goethe-Universität Frankfurt am Main, Institute of Occupational Medicine, Social Medicine and Environmental Medicine<br>Groneberg, David; Goethe-Universität Frankfurt am Main, Institute of Occupational Medicine, Social Medicine and Environmental Medicine |
| <b>Primary Subject Heading</b>: | Dermatology                                                                                                                                                                                                                                                                                                                                                                                                                                                                                                                                                                                                                                                                                                                                                                                                                                             |
| Secondary Subject Heading:      | Medical publishing and peer review                                                                                                                                                                                                                                                                                                                                                                                                                                                                                                                                                                                                                                                                                                                                                                                                                      |
| Keywords:                       | odds ratio, prestige, citations, productivity, career                                                                                                                                                                                                                                                                                                                                                                                                                                                                                                                                                                                                                                                                                                                                                                                                   |
|                                 |                                                                                                                                                                                                                                                                                                                                                                                                                                                                                                                                                                                                                                                                                                                                                                                                                                                         |

SCHOLARONE™  
Manuscripts

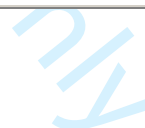

# Gender disparities in high-quality dermatology research - a study on scientific authorships

Michael H. K. Bendels<sup>1</sup>, Michelle C. Dietz<sup>1</sup>, Dörthe Brüggmann<sup>1</sup>, Gerhard M. Oremek<sup>1</sup>,  
Norman Schöffel\*<sup>1</sup>, and David A. Groneberg\*<sup>1</sup>

<sup>1</sup>Goethe-Universität Frankfurt am Main, Institute of Occupational Medicine, Social Medicine  
and Environmental Medicine, Division of Computational Medicine

\*: equally distributed

Correspondence:

Dr. med. Dr. rer. nat. Michael H.K. Bendels, MD, PhD  
Reader and Consultant Neurologist  
Postal Address:  
Theodor-Stern-Kai 7  
60590 Frankfurt  
Germany

Phone: +49-69-6301-6650  
Fax: +49-69-6301-7053  
email: [bendels@med.uni-frankfurt.de](mailto:bendels@med.uni-frankfurt.de)  
[www.asu.med.uni-frankfurt.de](http://www.asu.med.uni-frankfurt.de)

## List of Abbreviations

**AAGR:** Average Annual Growth Rate

**FAOP:** Proportion of Female Authorships

**FAP:** Female Authorship Ratio

**PI:** *Prestige Index*

For peer review only

## Abstract

**Objective:** The present study aims to elucidate the state of gender equality in high-quality dermatological research by analyzing the representation of female authorships from January, 2008 to May, 2017.

**Design:** Retrospective, descriptive study.

**Setting:** 113,189 male and female authorships from 23,373 research articles published in twenty-three dermatological Q1 journals were analyzed with the aid of the Gendermetrics Platform.

**Results:** 43.0% of all authorships and 50.2% of the first-, 43.7% of the co- and 33.1% of the last-authorships are held by women. The corresponding female-to-male odds ratios are 1.41 (CI: 1.37-1.45) for first authorships, 1.07 (CI: 1.04-1.10) for co-authorships and 0.60 (CI: 0.58-0.62) for last authorships. The annual growth rates are 1.74% overall and 1.45% for first authorships, 1.53% for co-authorships, and 2.97% for last authorships. Women are slightly underrepresented at prestigious authorships compared to men. The underrepresentation remains stable in highly competitive articles attracting the highest citation rates, namely, articles with many authors and articles that were published in highest-impact journals. Multi-author articles with male key authors are only slightly more frequently cited than those with female key authors. Women publish slightly fewer papers compared to men (47.2% women hold 43.0% of the authorships). At the level of individual journals, there is a high degree of uniformity in gender-specific authorship odds. By contrast, distinct differences at country level were revealed. The prognosis for the next decades forecasts a consecutive harmonization of authorship odds between the two genders.

**Conclusions:** Female scholars are well-represented in the field of high-quality dermatological research compared to other medical disciplines. A gender gap consists mainly in the form of a career dichotomy, with many female early career researchers and few women in academic

1  
2  
3 leadership positions. However, this gender gap has been narrowed in the last decade and  
4  
5 will likely be further reduced in the future.  
6  
7  
8  
9

10 **Keywords:** odds ratio; prestige; citations; productivity; career  
11  
12  
13  
14  
15

### 16 **Strengths and limitations of this study**

- 17 • Methodically, our purely bibliometric and algorithmic approach enables us to analyze  
18 large volumes of data standardized and independent of the examiner, and thus with  
19 a minimized interindividual variability.  
20  
21
- 22 • However, it is limited by the absence of information concerning equally distributed  
23 authorships, corresponding authors, as well as data providing information about the  
24 scholar's academic degree, their position (e.g. Associate Professor vs. Full Professor)<sup>1</sup>,  
25 age, employment status and their participation on editorial boards<sup>24,40</sup>.  
26  
27
- 28 • Furthermore, the investigation period is technically limited to articles that are  
29 published after 2007 due to the predominance of initials preventing a correct gender  
30 identification by first names in older articles<sup>18</sup>.  
31  
32  
33  
34  
35  
36  
37  
38  
39  
40  
41  
42  
43  
44  
45  
46  
47  
48  
49  
50  
51  
52  
53  
54  
55  
56  
57  
58  
59  
60

## Introduction

The past decades have seen an enormous increase in the number of women entering medicine<sup>1</sup>: While in 1969, 6.9% of the U.S. medical graduates were women, the percentage reached a value of 47.5% in 2014<sup>2</sup>. The enrollment in U.S. medical school in 2016 was almost evenly divided between women (49.8%) and men (50.2%)<sup>3</sup>. Despite this enormous increase of women entering the field of medicine, "across medicine and dermatology, this influx has not been accompanied by a parallel progress by female faculty with academic credentials or in leadership roles", as stated by an editorial of Alexa Kimball<sup>4</sup> and many articles have addressed different gender and generational aspects in academic dermatology in the past years<sup>5-7 8 9</sup>. In 2012, Sadeghpour et al. published results from a national survey on the role of sex in academic dermatology<sup>1</sup>. They assessed whether there is an association between gender and academic rank. They came to the conclusion that sex-based differences in academic dermatology, including career track, academic rank distribution, leadership, and career satisfaction, persist<sup>1</sup>. Of a total of 259 full-time US academic dermatologists (38.6% were female), they found that men held more senior positions even after adjustment for age and number of years since completion of residency<sup>1</sup>. Working hours did not differ significantly. While most men (90.3%) and women (82.8%) were satisfied with their career, women were 24.6% more likely than men to consider leaving academia<sup>1</sup>.

Bearing these gender issues in mind, we here focused on the following question: When gender disparities are present in academic rank, how is gender balanced in the academic community that undertakes and publishes high-quality clinical, translational and basic research in dermatology worldwide?

As stated previously, an indicator for the balance between integration of female and male

1  
2  
3 dermatologists and scientists is the quantification of their scholastic activity as represented  
4  
5 by “authorship” in scientific publications<sup>10-13</sup>. In general, authorships represent the currency  
6  
7 system of research and academic community<sup>14</sup>. In original medical articles, the assignment  
8  
9 of authorship follows, by convention, the rule that “the first author indicates the person  
10  
11 whose work underlies the paper as a whole”<sup>15</sup>, whereas the last authorship “indicates a  
12  
13 person whose work or role made the study possible without necessarily doing the actual  
14  
15 work”<sup>15</sup>. Thus, the assignment of authorships differs considerably from, for example,  
16  
17 economics or mathematics, where authors are usually listed in alphabetical order<sup>14</sup>. One  
18  
19 consequence is that an early-career researcher normally publishes as first or co-author,  
20  
21 whereas a senior researcher prefers the last author position in original research articles<sup>16,17</sup>.  
22  
23 A further consequence of this assignment rule is that the different types of authorships are  
24  
25 associated with different prestige. Specifically, first and last authorships have a significantly  
26  
27 higher reputation than co-authorships<sup>16</sup>.  
28  
29  
30  
31  
32  
33  
34

35 Based on these consideration, we here applied the recently established Gendermetrics  
36  
37 Platform<sup>18</sup> to analyze the integration of women in high-quality dermatological research by  
38  
39 assessing 113,189 male and female authorships from twenty-three dermatological Q1  
40  
41 journals.  
42  
43

44 Conceptually, we determined the proportion of female first, co- and last authorships and  
45  
46 quantified the relative distribution of female authorships among the different authorships  
47  
48 compared to men by applying odds ratios. Moreover, we used the *Prestige Index* to analyze  
49  
50 the distribution of prestigious authorships between the two genders. The analysis includes  
51  
52 global status and temporal development, differences across countries and the role women  
53  
54 tend to have in articles with many authors, e.g. collaboration on articles<sup>12</sup>. Moreover, a  
55  
56  
57  
58  
59  
60



1  
2  
3 gender-specific analysis of scholarly productivity and citation rate was conducted. The study  
4  
5 concludes with a ten-year forecast regarding the development of gender disparities in the  
6  
7 field of high-quality dermatological research.  
8  
9  
10  
11  
12  
13  
14  
15  
16  
17  
18  
19  
20  
21  
22  
23  
24  
25  
26  
27  
28  
29  
30  
31  
32  
33  
34  
35  
36  
37  
38  
39  
40  
41  
42  
43  
44  
45  
46  
47  
48  
49  
50  
51  
52  
53  
54  
55  
56  
57  
58  
59  
60

For peer review only

## Methods

### Data acquisition & integration

The data analysis was conducted using Gendermetrics.NET<sup>18</sup>, a SQL-Server based Platform for analyzing bibliometric data with a special emphasis on gender aspects. Research articles from high impact dermatology journals listed in the Scimago Journal & Country Rank database (<http://www.scimagojr.com/journalrank.php?category=2708>) were acquired on May 15, 2017 from the Web of Science Core Collection (Thomson Reuters). The journals constitute the subset of dermatological Q1 journals representing the top 25% of the corresponding impact factor distribution. The journals '*Fibrogenesis and Tissue Repair*', '*Infectious Diseases in Obstetrics and Gynecology*' and '*Dermatology and Therapy*' were not considered because there were not indexed in the Web of Science database. The journals '*Aids Research and Treatment*', '*BMC Dermatology*', '*Clinics in Dermatology*', '*Dermato-Endocrinology*' and '*HIV/AIDS-Research and Palliative Care*' were excluded from analysis due to a low number of articles (< 200 articles). Furthermore, the journals '*British Journal of Dermatology*' and '*Journal of the European Academy of Dermatology and Venereology*' had to be excluded from analysis due to the predominant usage of initials instead of full first names, which prevents the correct gender determination. In total, 23 of the 33 dermatological Q1-journals with 23,373 articles written by 74,354 authors remain for analysis.

### Gender determination

The algorithmic gender determination operates on the basis of a data table containing the gender of 77,818 forenames (male, female or unisex), see Bendels et al.<sup>18</sup>. By applying the algorithm, 30,538 (= 41.1%) male authors, 27,261 (= 36.7%) female authors, 5,509 (= 7.4%) unisex authors and 11,046 (= 14.9%) undefined authors were determined with a relatively little inter-annual variability (supplementary Fig. 2). The Unisex and undefined authors and

1  
2  
3 their authorships were not taken into consideration (in total 27,182 authorships). As a result,  
4  
5 113,189 male and female authorships affiliated to institutions from 150 countries were  
6  
7 analyzed. The research output of a country was thereby benchmarked by considering the  
8  
9 authorships of the related institutions<sup>12</sup>. It is important to note, that the quality of gender  
10  
11 detection depends on the authorships country as illustrated by supplementary Fig. 3. In  
12  
13 order to ensure the validity of the *country-specific* analysis, we set a threshold criterion for  
14  
15 the country-specific analysis (supplementary Fig. 3), as recently described in Bendels et al.<sup>18</sup>.  
16  
17 In particular, only countries with a detection rate of at least 79.3% male or female  
18  
19 authorships were considered. As a result, among the top 20 most productive countries, the  
20  
21 Asian countries China, South Korea (with high rates of unisex names) and India (with many  
22  
23 undefined names) were excluded. A bibliometric overview is given in supplementary Fig. 1.  
24  
25  
26  
27

### 28 **Proportion of Female Authorships (FAP) & Female Authorship Odds Ratio (FAOR)**

29 In this study, first-, co- and last-authorships were considered, whereby co-authorships  
30  
31 encompasses all authorships between *one* first- and *one* last-authorship. Equally distributed  
32  
33 authorships were not considered due to a lack of information. The ***proportion of female***  
34  
35 ***authorships (FAP)*** is defined as the quotient between the female authorship count and the  
36  
37 total sum of male and female authorships. The FAP is presented as a percentage to improve  
38  
39 the textual readability. The female to male odds ratios for first-, co- and last-authorships  
40  
41 were determined (***female authorship odds ratio, FAOR***) with the corresponding confidence  
42  
43 intervals at a confidence level of 95%<sup>12</sup>. The FAOR measures the female odds of securing a  
44  
45 particular authorship type compared to men. A FAOR of e.g. 2.0 or 0.5 means that women or  
46  
47 men, respectively, have twice the odds of holding a particular authorship compared to  
48  
49 respective other gender<sup>12</sup>. For a simplified representation, a triplet is used to indicate the  
50  
51 sign of the ***significant*** female odds ratio excess to get a particular authorship. For example,  
52  
53  
54  
55  
56  
57  
58  
59  
60

1  
2  
3 the FAOR-triplet (-, =, +) indicates that women have *significantly* lower odds ratios for first-,  
4  
5 equal odds ratios for co- and significantly higher odds ratios for last-authorships compared  
6  
7 to men<sup>12</sup>. In summary, the FAP measures the quantitative representation of female  
8  
9 authorships, whereas the FAORs quantify the relative distribution of female authorships  
10  
11 among the different authorships<sup>12</sup>. To increase the statistical significance, the FAP/FAOR-  
12  
13 classification is only conducted for subjects (e.g. countries) with at least 750 male or female  
14  
15 authorships.  
16  
17

### 18 19 20 **Prestige Index**

21 The *Prestige Index* measures the female odds of holding prestigious authorships compared  
22  
23 to men<sup>12</sup>. It is defined as the prestige-weighted average of the FAOR excess  $\varepsilon_t$  that is  
24  
25 calculated over all authorship types  $t$  (i.e. for first, co- and last authorships),  $\varepsilon_t = w_t (\text{FAOR}_t -$   
26  
27  $1)$ , if  $\text{FAOR}_t \geq 1$ , otherwise  $\varepsilon_t = w_t (1 - 1/\text{FAOR}_t)$  with the weighting factor  $w_t$ <sup>12</sup>. In medical  
28  
29 science, the prestige of scholarships follows a ranked order with a higher reputation of first  
30  
31 and last authorships and a lower reputation of co-authorships<sup>16</sup>. Specifically, a potentially  
32  
33 alphabetical ordering of the author list was excluded by an additional test (supplementary  
34  
35 Fig. 5). Therefore, co-authorships were weighted negatively ( $w_{\text{co}} = -1$ ), whereas first and last  
36  
37 authorships were weighted positively ( $w_{\text{first}} = w_{\text{last}} = 1$ )<sup>12</sup>. This definition implies that the  
38  
39 *Prestige Index* is e.g. lowered by both higher odds for co-authorships and lower odds for first  
40  
41 and last authorships. A value of 0 characterizes a balanced distribution of prestigious  
42  
43 authorships between the two genders, whereas a value above (below) 0 indicates an excess  
44  
45 (lack) of prestigious authorships held by women.  
46  
47  
48  
49  
50

### 51 52 **Analysis of data**

53 Average annual growth rates (AAGR) were applied to characterize annual growth rates<sup>12</sup>. The  
54  
55 AAGRs of both, FARs and number of authorships were used to make a linear prognosis of the  
56  
57  
58  
59  
60

1  
2  
3 temporal development of FAP, FAOR and *Prestige Index* for the coming decade. The Pearson  
4  
5 correlation was applied to evaluate the linear association between the FAP, the *Prestige*  
6  
7 *Index* and the Scimago Journal Rank Index (SJRI). The latter index was applied as an indicator  
8  
9 for the scientific impact of the journals. The null hypothesis, whether the *non-normally*  
10  
11 distributed gendered citation rates (supplementary Fig. 4) stem from the same distribution,  
12  
13 was tested by a Kruskal-Wallis-test and a post-hoc multi-comparison test. The significance  
14  
15 threshold was set at .05.  
16  
17  
18  
19  
20  
21  
22  
23  
24  
25  
26  
27  
28  
29  
30  
31  
32  
33  
34  
35  
36  
37  
38  
39  
40  
41  
42  
43  
44  
45  
46  
47  
48  
49  
50  
51  
52  
53  
54  
55  
56  
57  
58  
59  
60

## Results

### Female authorships on a global level

In a first step, we analyzed the representation of female authorships on a global level. The analysis reveals an underrepresentation of female authorships with a FAP of 43.0% (Fig. 1A, bottom), relatively more first-authorships (50.2%), an almost equal proportion of female co-authorships (43.7%) and a substantially less fraction of last-authorships (33.1%). The corresponding FAORs (Fig. 1A) are 1.41 (CI: 1.37-1.45) for first authorships, 1.07 (CI: 1.04-1.10) for co-authorships and 0.60 (CI: 0.58-0.62) for last authorships. The differences are statistically significant ( $P < .05$ ) for all types of authorships between the two genders. Thus, the global FAOR-pattern is characterized by the FAOR-triplet (+, +, -), i.e. women have significant higher odds for first and co-authorships and significant lower odds for last-authorships. The *Prestige Index* is on average -0.11, indicating a minor lack of prestigious authorships held by women (Fig. 1A, bottom).

The FAP exhibits a relatively high increase over the evaluation period (39.5% in 2008, 46.1% in 2017, Fig. 1B) with an AAGR of 1.74%. The subanalysis reveals a disproportionally high annual growth for last authorships (2.97%) and disproportionally low values for co- (1.53%) and first authorships (1.45%). Overall, this led to more gender-neutrality in authorships odds during the recent years, as also indicated by the *Prestige Index* (-0.19 in 2008 and -0.11 in 2017).

### Differences across countries

When we refined our analysis from global to country-specific level, we identified among the most productive countries a wide range of FAPs that extent from 66.7% in Finland to 25.3% in Japan (Table 1). Different FAOR-patterns were identified ranging from *unfavorable* with the FAOR-triplet (=, +, -) identified in Poland, Italy, and Spain to *favorable* with the FAOR-triplet (+, -, =) in Denmark, Finland and the Netherlands (Table 1). Israel provides gender-

1  
2  
3 neutrality with respect to all authorships (FAOR-triplet (=, =, =)). The majority of the  
4  
5 countries exhibit FAOR-patterns that are characterized by lower female odds for last and  
6  
7 higher female odds for first authorships compared to men. Remarkably, there is not a single  
8  
9 country where women have currently higher odds for a last authorship compared to men.  
10

11  
12 When considering the distribution of prestigious authorships, we found countries with very  
13  
14 high *Prestige Indices*, like Denmark (*Prestige Index* = 0.60), Finland (0.54), and the  
15  
16 Netherlands (0.42). In these countries, women have higher odds to hold a prestigious  
17  
18 authorship compared to men. By contrast, Italy (*Prestige Index* = -0.46), Spain (-0.50), Japan  
19  
20 (-0.51) and Austria (-0.58) are characterized by a lack of prestigious authorships held by  
21  
22 women. Remarkably, we found no significant correlation between the FAP of a country and  
23  
24 its *Prestige Index* ( $r(18)=0.36, P>.05$ ).  
25  
26  
27  
28

### 29 **Differences across journals**

30  
31 At the level of individual journals, the FAP ranges from 53.4% in *Sexually Transmitted*  
32  
33 *Diseases* to 32.9% in *Lasers in Surgery and Medicine* (Table 2). The predominant FAOR-  
34  
35 pattern is characterized by the FAOR-triplet (+, =, -). Moreover, in almost all journals (with  
36  
37 the exception of *Contact Dermatitis*) women have significant lower odds for last-  
38  
39 authorships. Furthermore, no single journal currently exists, where a) male scholars have  
40  
41 significantly higher odds for first authorships compared to their female counterparts, and b)  
42  
43 where women have higher odds to secure last authorships than men.  
44  
45  
46

47  
48 The *Prestige Index* value range is from -0.50 to 0.19 (Table 2): Best odds for women to secure  
49  
50 prestigious authorships are given in *Contact Dermatitis* (*Prestige Index* = 0.19) and *Acta*  
51  
52 *Dermato-Venereologica* (0.11), whereas *Dermatology* (-0.5) and *Mycoses* (-0.41) provide  
53  
54 best odds for male scholars. We found no significant correlation between the a) FAP of the  
55  
56  
57  
58  
59  
60

1  
2  
3 journal and its *Prestige Index* ( $r(21)=0.08$ ,  $P>.05$ ), b) the FAP and the SJRI ( $r(21)=0.28$ ,  $P>.05$ ),  
4  
5 and c) the SJRI and the *Prestige Index* ( $r(21)=0.30$ ,  $P>.05$ ).  
6  
7

### 8 **Female authorships by authors per article**

9 We also assess the role women tend to have in articles with many authors, e.g. collaborative  
10  
11 articles. The FAP fluctuates between 40.9% (1-3 authors/article) and 43.7% (7-9  
12  
13 authors/article) and exhibits no significant correlation to the number of authors per article.  
14  
15 Although the FAORs for first and last authorships have the tendency to slightly increase and  
16  
17 decrease, respectively, with an increasing number of authors, this trend is reversed for  
18  
19 higher author rates (>12 authors/article) (Fig. 2). In addition, the FOAR for co-authorships  
20  
21 shows no significant relationship to the author rate. As a consequence, the *Prestige Index*  
22  
23 fluctuates between -0.02 (13-15 authors/article) and -0.21 (>15 authors/article). To  
24  
25 summarize, FAP, FAORs and *Prestige Index* show no clear correlation to the number of  
26  
27 authors per article.  
28  
29  
30  
31  
32

### 33 **Citation & Productivity Analysis**

34 The analysis reveals that articles with male key authors are more frequently cited than  
35  
36 articles with female authors (Fig. 3A). However, the differences are very low as articles with  
37  
38 a male last or first author have average citation rates of 9.7 citations/article and 9.6  
39  
40 citations/article, respectively and articles with a female first or last author exhibit citation  
41  
42 rates of 9.1 citations/article and 9.0 citations/article, respectively. Statistically significant  
43  
44 differences in the distributions of citation rates were only found between articles with male  
45  
46 last authors and all other article groups (Kruskal-Wallis-Test,  $P<.05$ ). Articles with a female  
47  
48 first or last authorship were on average below the mean citation rate of 9.2 citations/article.  
49  
50  
51

52  
53 The analysis of combined authorships shows that male-first/female-last and male-first/male-  
54  
55 last articles have on average the highest citation rates with 10.1 citations/article and 9.9  
56  
57  
58  
59  
60



1  
2  
3 citations/article, respectively, followed by female-first/male-last (9.5 citations/article) and  
4  
5 female-first/female-last (8.5 citations/article) articles (Figure 3A, right). Single-authored  
6  
7 articles have the lowest citation rates with slightly higher citation rates for male-authored  
8  
9 articles (6.8 citations/article vs. 6.5 citations/articles).

10  
11  
12 The analysis further demonstrates that statistically the citation rate of an article gets higher  
13  
14 the more authors are involved, e.g. articles with 1-3 authors are on average cited 7.8 times,  
15  
16 whereas articles with more than 15 authors are cited 15.9 times on average (Fig. 3B).  
17  
18 Furthermore, the revealed differences in the citation rates between articles with male or  
19  
20 female key authors are not preserved when articles are grouped by the length of their  
21  
22 author list, as shown by Fig. 3B. In this grouping scheme, articles with female last authors  
23  
24 and more than 15 authors attract the highest citation rates of on average 18.6 citations per  
25  
26  
27  
28  
29 article.

30  
31  
32 Considering the gender-specific distribution of the article count per author, we found, that  
33  
34 the subgroups 'author of 1 article' and 'author of 2 articles' are relatively dominated by  
35  
36 women. In particular, 71.5% of the female authors, but only 68.1% of the male authors had  
37  
38 published a single article in our data set (Fig. 3C). By contrast, all other subgroups with three  
39  
40 or more articles per author show a relative overrepresentation of male authors. Particularly,  
41  
42 the subgroup of most productive authors ('author of more than 10 articles') is considerably  
43  
44 dominated by men (2.4% of the male authors vs. 1.2% of the female authors). This finding  
45  
46 results in a slightly higher productivity of male authors, as 53.0% of male authors hold 57.0%  
47  
48  
49  
50 of all authorships (Fig. 3C).

## Discussion

### Advanced integration of women

The field of high-quality dermatological research is characterized by a moderate underrepresentation of female authorships with an FAP of 43.0%. This value is considerably higher than the previously determined FAPs, which were found for the whole area of science (30%)<sup>11</sup>, for six high-quality medical journals (34%)<sup>19</sup>, and for similar studies from the research fields of epilepsy (39.4%)<sup>12</sup>, schizophrenia (37.6%)<sup>10</sup>, stroke research (36.3%, unpublished data), and lung cancer research (31.3%)<sup>20</sup>.

Female scholars are inhomogeneously distributed across the different authorships: We found many female first authorships and a significantly lower proportion of female last authorships. Evidently, this finding illustrates the well-known, gender-specific career dichotomy as first- or co-authorships are usually held by early career researchers, whereas last authorships are regularly preserved for institutional heads or principal investigators<sup>16</sup>. Such a discrepancy in leadership positions has been described for the most scientific disciplines<sup>11</sup>, including various medical research fields<sup>1,10,12,21-24</sup>. What are the reasons for such a striking career dichotomy between the two genders? Differences in career preferences between men and women are one reason that can be cited in this regard<sup>25</sup>. Specifically, it has been shown that men were more likely to occupy investigative career tracks (26.5% vs. 11.1%), whereas women predominantly occupied clinical educator tracks (81.5% vs. 50.0%) in U.S. dermatology<sup>1</sup>. Other reasons include altered life priorities like family planning<sup>11</sup>, the lack of role models<sup>24</sup>, an insufficient work-life balance<sup>24</sup>, women's increased likelihood to occupy part-time positions<sup>1</sup>, and the consistently high influx of female medical students and graduates<sup>24</sup>.

1  
2  
3 Interestingly, low female odds for last-authorships are numerically compensated by high  
4  
5 female odds for first-authorships. This constellation leads to an almost gender neutral  
6  
7 distribution of prestigious authorships on the global level. This finding is important, since  
8  
9 academic publishing at prestigious authorships is one of the core elements of career  
10  
11 advancement in science<sup>10,26-28</sup>. However, the underrepresentation of last authorships  
12  
13 potentially reduces the further career advancement of the female scientists<sup>29</sup>, since last  
14  
15 authorships are often taken as a major indicator of successful leadership, e.g. by committees  
16  
17 making this a criterion in granting and hiring<sup>16</sup>. In line with this, a cross-sectional survey from  
18  
19 2009 revealed a clear sex difference in academic *senior* ranks of U.S. dermatologists, as it  
20  
21 was reported that "women were predominantly at the assistant professor level (50.0%)  
22  
23 compared with men (24.3%), whereas men were predominantly at the full professor level  
24  
25 (47.4%) compared with women (14.9%)"<sup>1</sup>. Evidently, in dermatology, the proportion of  
26  
27 female faculty members declined as academic rank increased.  
28  
29  
30  
31

### 32 33 **Stable representation of women in multi-author articles results in almost** 34 **gender-neutral citation rates** 35

36 Remarkably, we found no significant relationship between the representation of female  
37  
38 authorships and the number of authors per article. Specifically, the representation of female  
39  
40 authorships remains also stable for articles with high numbers of authors (e.g. collaboration  
41  
42 articles), which statistically attract the highest citation rates (Fig. 3B)<sup>30</sup>. This is an important  
43  
44 result, since it provides a good explanation for the almost equal citation rates of articles that  
45  
46 were grouped by the gender of their keys authors. This is particularly remarkable, since for  
47  
48 all other disciplines we have examined so far, we find a) an accentuating  
49  
50 underrepresentation of women at prestigious authorships with an increasing number of  
51  
52 authors per article and b) significantly higher citation rates of articles with male key authors.  
53  
54  
55 Moreover, previous studies from various disciplines also reported about substantially higher  
56  
57  
58  
59  
60

1  
2  
3 citation rates for articles with male key authors<sup>11,27,29,31,32</sup>. To summarize, well-balanced  
4  
5 citation rates between the two genders suggest that the integration of women in  
6  
7 dermatological science is well-advanced. Methodically, it is important to note that the  
8  
9 determined citation rates describe essentially the situation from the early phase of  
10  
11 investigation (2008-2010), since older articles have a stronger impact on the citation  
12  
13 statistics than newer articles ("Cited Half-Life")<sup>33</sup>.  
14  
15

### 16 17 **Structural position affects productivity**

18 The lower productivity of female scholars (47% female authors hold 43% of the authorships)  
19  
20 is in line with reports from other scientific fields and medical disciplines<sup>10-12,21-23,34</sup>.  
21  
22 Interestingly, we were able to reproduce the clear male overrepresentation at levels of  
23  
24 higher productivity (Fig. 3C), as already shown for the fields of ecology and evolutionary  
25  
26 biology<sup>32</sup>, and the medical research fields of schizophrenia<sup>10</sup> and epilepsy<sup>12</sup>. It is reasonable  
27  
28 to assume that the primary factors affecting women's productivity are not higher rejection  
29  
30 rates as explicitly shown for the journals *Cortex*<sup>35</sup> and *Nature Neuroscience*<sup>36</sup>, but rather, due  
31  
32 to the position of women within the scientific system<sup>26</sup>. In practice, the mainly male senior  
33  
34 scientists are often associated to more or less fruitful (citation) networks, whereas "women  
35  
36 are more likely to work as adjuncts or at teaching-intensive institutions with limited  
37  
38 resources"<sup>26</sup>. This assumption is confirmed by a previous study from Sadeghpour et al.<sup>1</sup>  
39  
40 documenting no differences in the number of publications of full-time academic  
41  
42 dermatologists after adjustment for academic rank. Moreover, it has been shown by Reed et  
43  
44 al.<sup>34</sup> that women's publication rates start to increase later in their career.  
45  
46  
47  
48  
49  
50

### 51 **Distinct regional differences**

52 Apart from these global findings, distinct regional differences were found with best-balanced  
53  
54 authorship odds between the two genders in Israel (FAOR-triplet (=, =, =), *Prestige Index* = -  
55  
56 0.01). When taking the chance of holding a prestigious authorship as a general surrogate  
57  
58  
59  
60

1  
2  
3 parameter for career advancement in science <sup>12</sup>, Denmark, Finland, and the Netherlands  
4  
5 provide the best conditions for female authors. By contrast, Italy, Spain, Japan, and Austria  
6  
7 offer optimal conditions for men in dermatological research. This finding correlates quite  
8  
9 well with the results of the Global Gender Gap Report 2016 as the countries Finland, the  
10  
11 Netherlands and Denmark were ranked 2<sup>nd</sup>, 16<sup>th</sup>, and 19<sup>th</sup>, respectively, whereas the  
12  
13 countries Spain, Italy, Austria, and Japan were ranked 29<sup>th</sup>, 50<sup>th</sup>, 52<sup>nd</sup> and 111<sup>th</sup>, respectively,  
14  
15 out of a total of 144 countries in the world <sup>37</sup>. It is plausible to assume that these regional  
16  
17 differences are not caused by discipline-specific characteristics, but rather, are primarily due  
18  
19 to socio-cultural surroundings, as, for example, Japan is characterized by a strong sense of  
20  
21 patriarchy and traditional gender roles in society<sup>38</sup>. This is all the more relevant, since similar  
22  
23 constellations were found in most of our studies<sup>10,12</sup>. Overall, the given information supplies  
24  
25 women operating in the field of dermatology with a solid basis for decision-making for  
26  
27 professional reorientation or career planning.  
28  
29  
30  
31

32  
33 As in all our previous studies, we did not find a significant correlation between the FAP of a  
34  
35 country and the distribution of prestigious authorships between the two genders<sup>10</sup>. This  
36  
37 means, countries with a high FAP can also provide disadvantageous career opportunities for  
38  
39 women and vice versa. A valuable example is Italy with a high rate of FAP (54.2%) and a  
40  
41 negative *Prestige Index* (-0.46). Interestingly, this finding is contrary to the socio-cultural  
42  
43 theory of the critical mass<sup>39</sup>, postulating a self-sustained harmonization of gender aspects  
44  
45 once the participation of women has exceeded a critical threshold value of about 30% to  
46  
47 35%.  
48  
49  
50

### 51 52 **Journals with a high degree of uniformity**

53 At the level of individual journals, we reveal a striking uniformity of gender-specific  
54  
55 authorship odds, as in 19 out of 23 journals women have significantly higher odds for first  
56  
57  
58  
59  
60

1  
2  
3 authorships and lower odds for last authorships. Evidently, the global gender-specific  
4  
5 hierarchy of research groups is mapped to the related journals. This finding explains also the  
6  
7 relatively small value range of the journals' Prestige Index compared to that of other  
8  
9 countries ( $\Delta$ *Prestige Index*: 0.69 vs. 1.18). Remarkably, we do not find a significant  
10  
11 correlation between the impact of a journal (characterized by the SJRI) and the revealed  
12  
13 Prestige Index measuring the distribution of prestigious authorships between the two  
14  
15 genders. Interestingly, this finding is contrary to a previously unpublished study analyzing  
16  
17 the female authorship odds in fifty-four of *highest-quality* research journals listed in the  
18  
19 Nature Index, which covers the journal categories *Life Science, Multidisciplinary, Earth &*  
20  
21 *Environmental and Chemistry*. In this study a clear negative correlation between the 5-year-  
22  
23 impact factor of a journal and its Prestige Index ( $r(52)=-0.63, P<.01$ ) was revealed. In contrast  
24  
25 to academic dermatology, in this cross-discipline group of highest-impact journals, the  
26  
27 female underrepresentation is accentuated in highly competitive articles attracting the  
28  
29 highest citation rates, namely, articles with many authors and articles that were published in  
30  
31 highest-impact journals. To conclude, uniformity of authorship odds as well as stable  
32  
33 representation of women regardless of the journal impact speak for an advanced integration  
34  
35 of women and against the predominance of "old boys' networks" in the field of high-quality  
36  
37 dermatology research and its related journals<sup>12</sup>.  
38  
39  
40  
41  
42  
43  
44

### 45 **Conclusion & Outlook**

46 In conclusion, a) the relatively high FAP, b) the almost gender-neutral citation rates, and c)  
47  
48 the stable representation of female scholars in both articles with many authors as well as  
49  
50 highest impact journals can be considered indicators for a well-advanced integration of  
51  
52 women in high-quality dermatological research. However, a considerable career dichotomy  
53  
54 is still present, with many female researchers at the beginning of their career and few  
55  
56  
57  
58  
59  
60

1  
2  
3 women in academic leadership positions. Since there is a clear time-dependence present in  
4  
5 authorship hierarchy - current early career researchers may be future research leaders – it is  
6  
7 plausible to prognosticate a considerable increase of women in academic leadership  
8  
9 positions in the next decade. This trend will likely be intense due to the high annual increase  
10  
11 of female authorships (1.74%) with the highest rates for the last author position (2.97%), and  
12  
13 the global trend of more and more female physicians entering the field of medicine <sup>2</sup>. In line  
14  
15 with this perspective, a linear prognosis of the temporal development of female authorships  
16  
17 prognosticates not only an FAP of 54.3% for the year 2026, but also increasing female odds  
18  
19 for last authorships and decreasing female odds for co-authorships (Fig. 4). This  
20  
21 harmonization in authorship odds results in a Prestige Index that is forecast to become  
22  
23 almost gender-neutral in 2026 (*Prestige Index* = -0.03). On this basis, we expect a deeper  
24  
25 integration of female scientists with a growing number of women in academic leadership  
26  
27 positions in the next decade. However, it should be critically mentioned that, contrary to this  
28  
29 prediction, various studies recently report about a striking persistence of gender inequalities  
30  
31 regarding academic leadership positions despite a considerable increase in female first  
32  
33 authorships <sup>22-24,41</sup>.  
34  
35  
36  
37  
38  
39

40 In view of this, the present analysis may define a starting point: Continuous monitoring over  
41  
42 the next years will elucidate if female career dichotomy will break down, leading to a more  
43  
44 balanced distribution of research leaders between both genders in dermatological research.  
45  
46  
47  
48  
49  
50  
51  
52  
53  
54  
55  
56  
57  
58  
59  
60

### CONTRIBUTORSHIP STATEMENT

MHB and DAG designed the study. MHB and MCD collected and performed the analysis. MHB, MCD, DB, GMO, NS and DAG interpreted the result. MHB wrote the first draft of manuscript. MHB, MCD, DB, GMO, NS and DAG contributed to and have approved the final manuscript.

### DATA SHARING STATEMENT

No additional data available.

### COMPLIANCE WITH ETHICAL STANDARDS

**Conflict of Interest:** The authors declare that they have no conflict of interest.

**Funding:** This research received no specific grant from any funding agency in the public, commercial or not-for-profit sectors.

**Ethical approval:** This article does not contain any studies with human participants or animals performed by any of the authors.



**Table 1: Country Classification.** Countries are descendingly ordered by their *Prestige Index*.

The number of considered male and female authorships is given by #Authorships.

| Country Name   | Female Authorship Ratio | FAOR-triplet | <i>Prestige Index</i> | #Articles | #Authorships |
|----------------|-------------------------|--------------|-----------------------|-----------|--------------|
| Denmark        | 43.4%                   | (+, -, =)    | 0.60                  | 637       | 2,392        |
| Finland        | 66.7%                   | (+, -, =)    | 0.54                  | 177       | 787          |
| Netherlands    | 44.8%                   | (+, -, =)    | 0.42                  | 941       | 3,400        |
| Brazil         | 56.1%                   | (+, -, -)    | 0.14                  | 959       | 4,141        |
| Turkey         | 45.2%                   | (+, =, =)    | 0.08                  | 518       | 1,930        |
| Sweden         | 53.7%                   | (+, =, -)    | 0.07                  | 630       | 2,118        |
| Israel         | 38.3%                   | (=, =, =)    | -0.01                 | 331       | 1,032        |
| Canada         | 42.1%                   | (+, =, -)    | -0.04                 | 816       | 2,160        |
| Germany        | 37.6%                   | (+, =, -)    | -0.09                 | 2,498     | 10,438       |
| Australia      | 42.6%                   | (+, =, -)    | -0.10                 | 817       | 3,016        |
| United States  | 42.9%                   | (+, +, -)    | -0.14                 | 8,391     | 33,510       |
| Belgium        | 51.2%                   | (+, =, -)    | -0.16                 | 378       | 1,001        |
| France         | 48.9%                   | (+, =, -)    | -0.17                 | 1,171     | 5,566        |
| United Kingdom | 45.8%                   | (+, +, -)    | -0.18                 | 1,751     | 4,825        |
| Switzerland    | 34.3%                   | (+, =, -)    | -0.26                 | 560       | 1,659        |
| Poland         | 54.2%                   | (=, +, -)    | -0.39                 | 257       | 967          |
| Italy          | 54.2%                   | (=, +, -)    | -0.46                 | 1,269     | 6,455        |
| Spain          | 48.8%                   | (=, +, -)    | -0.50                 | 711       | 3,073        |
| Japan          | 25.3%                   | (+, +, -)    | -0.51                 | 1,564     | 8,126        |
| Austria        | 38.6%                   | (+, +, -)    | -0.58                 | 475       | 1,760        |

**Table 2: Journal Classification.** Journals are descendingly ordered by their *Prestige Index*.

| Country Name                                   | Female Authorship Ratio | FAOR-triplet | Prestige Index | #Articles | #Authorships |
|------------------------------------------------|-------------------------|--------------|----------------|-----------|--------------|
| Contact Dermatitis                             | 49.5%                   | (+, -, =)    | 0.19           | 721       | 3,623        |
| Acta Dermato-Venereologica                     | 47.4%                   | (+, =, -)    | 0.11           | 834       | 4,749        |
| Sexually Transmitted Infections                | 50.1%                   | (+, =, -)    | 0.06           | 1,110     | 4,369        |
| Wound Repair and Regeneration                  | 38.1%                   | (+, =, -)    | 0.03           | 847       | 4,354        |
| Journal of Dermatological Science              | 33.4%                   | (+, =, -)    | 0.03           | 727       | 3,763        |
| Journal of the American Academy of Dermatology | 44.9%                   | (+, =, -)    | -0.01          | 2,103     | 11,338       |
| Sexually Transmitted Diseases                  | 53.4%                   | (+, =, -)    | -0.05          | 1,370     | 7,500        |
| Journal of Investigative Dermatology           | 42.1%                   | (+, =, -)    | -0.06          | 2,392     | 16,865       |
| Lasers in Medical Science                      | 40.1%                   | (+, =, -)    | -0.1           | 1,550     | 6,130        |
| American Journal of Clinical Dermatology       | 47.5%                   | (+, =, -)    | -0.13          | 263       | 981          |
| Melanoma Research                              | 44.6%                   | (+, =, -)    | -0.14          | 616       | 3,845        |
| Dermatologic Surgery                           | 35.9%                   | (+, =, -)    | -0.16          | 1,715     | 6,473        |
| Archives of Dermatological Research            | 41.6%                   | (+, =, -)    | -0.16          | 799       | 3,355        |
| Lasers in Surgery and Medicine                 | 32.9%                   | (+, =, -)    | -0.17          | 938       | 4,161        |
| Pigment Cell & Melanoma Research               | 42.9%                   | (+, =, -)    | -0.18          | 510       | 3,199        |
| Experimental Dermatology                       | 41.9%                   | (+, +, -)    | -0.19          | 1,644     | 8,732        |
| International Wound Journal                    | 37.1%                   | (=, +, -)    | -0.21          | 891       | 3,877        |
| JAMA Dermatology                               | 47.2%                   | (+, +, -)    | -0.27          | 491       | 3,163        |
| Journal of Dermatological Treatment            | 45.1%                   | (+, +, -)    | -0.3           | 655       | 2,590        |
| Dermatologic Clinics                           | 47.3%                   | (+, +, -)    | -0.35          | 569       | 1,205        |
| Clinics In Dermatology                         | 43.6%                   | (=, +, -)    | -0.39          | 743       | 1,732        |
| Mycoses                                        | 47.0%                   | (=, +, -)    | -0.41          | 974       | 3,710        |
| Dermatology                                    | 41.7%                   | (+, +, -)    | -0.5           | 911       | 3,475        |

## References

1. Sadehpour M, Bernstein I, Ko C, Jacobe H. Role of sex in academic dermatology: results from a national survey. *Archives of dermatology*. 2012;148(7):809-814.
2. Lautenberger DM, Dandar VM, Raezer CL, Sloane RA. The State of Women in Academic Medicine: The Pipeline and Pathways to Leadership, 2013-2014. 2014; <https://www.aamc.org/members/gwims/statistics/>. Accessed 2016-10-11, 2016.
3. Brooke B. Number of Female Medical School Enrollees Reaches 10-Year High. <https://news.aamc.org/press-releases/article/applicant-enrollment-2016/> 2016. Accessed November 01, 2016
4. Kimball AB. Sex, academics, and dermatology leadership: progress made, but no more excuses. *Archives of dermatology*. 2012;148(7):844-846.
5. Pincus S. Women in academic dermatology. Results of survey from the professors of dermatology. *Archives of dermatology*. 1994;130(9):1131-1135.
6. Jacobson CC, Resneck JS, Jr., Kimball AB. Generational differences in practice patterns of dermatologists in the United States: implications for workforce planning. *Archives of dermatology*. 2004;140(12):1477-1482.
7. Resneck JS, Jr., Tierney EP, Kimball AB. Challenges facing academic dermatology: survey data on the faculty workforce. *Journal of the American Academy of Dermatology*. 2006;54(2):211-216.
8. Turner E, Yoo J, Salter S, Kimball AB. Leadership workforce in academic dermatology. *Archives of dermatology*. 2007;143(7):948-949.
9. Jacobson CC, Nguyen JC, Kimball AB. Gender and parenting significantly affect work hours of recent dermatology program graduates. *Archives of dermatology*. 2004;140(2):191-196.
10. Bendels MHK, Bauer J, Schoffel N, Groneberg DA. The gender gap in schizophrenia research. *Schizophrenia research*. 2017.
11. Lariviere V, Ni C, Gingras Y, Cronin B, Sugimoto CR. Bibliometrics: global gender disparities in science. *Nature*. 2013;504(7479):211-213.
12. Bendels MHK, Wanke E, Schöffel N, Bauer J, Quarcoo D, Groneberg D. Gender equality in academic research on epilepsy - a study on scientific authorships. *Epilepsia*. 2017.
13. Jagsi R, Guancial EA, Worobey CC, et al. The "gender gap" in authorship of academic medical literature--a 35-year perspective. *The New England journal of medicine*. 2006;355(3):281-287.
14. Marusic A, Bosnjak L, Jeroncic A. A systematic review of research on the meaning, ethics and practices of authorship across scholarly disciplines. *PLoS one*. 2011;6(9):e23477.
15. Murphy TF. Authorship and Publication. In: McGee G. *Case Studies in Biomedical Research Ethics*. 1. edition ed: The MIT Press; 2004.
16. Tschardt T, Hochberg ME, Rand TA, Resh VH, Krauss J. Author sequence and credit for contributions in multiauthored publications. *PLoS Biol*. 2007;5(1):e18.
17. Fadeel B. "But many that are first shall be last; and the last shall be first". *FASEB journal : official publication of the Federation of American Societies for Experimental Biology*. 2009;23(5):1283.
18. Bendels MHK, Brüggmann D, Schöffel N, Groneberg DA. Gendermetrics.NET: a novel software for analyzing the gender representation in scientific authoring. *J Occup Med Toxicol*. 2016;11:43.

19. Filardo G, da Graca B, Sass DM, Pollock BD, Smith EB, Martinez MA. Trends and comparison of female first authorship in high impact medical journals: observational study (1994-2014). *BMJ*. 2016;352:i847.
20. Bendels MHK, Brüggmann D, N S, Groneberg D. Gendermetrics of cancer research: Results from a global analysis on lung cancer. *Oncotarget*. to appear in 2017.
21. West M, Curtis J. AAUP faculty gender equity indicators 2006. 2006; <https://www.aaup.org/NR/rdonlyres/63396944-44BE-4ABA-9815-5792D93856F1/0/AAUPGenderEquityIndicators2006.pdf>. Accessed 2006.
22. Long MT, Leszczynski A, Thompson KD, Wasan SK, Calderwood AH. Female authorship in major academic gastroenterology journals: a look over 20 years. *Gastrointestinal endoscopy*. 2015;81(6):1440-1447.e1443.
23. Liang T, Zhang C, Khara RM, Harris AC. Assessing the Gap in Female Authorship in Radiology: Trends Over the Past Two Decades. *Journal of the American College of Radiology : JACR*. 2015;12(7):735-741.
24. Amering M, Schrank B, Sibitz I. The gender gap in high-impact psychiatry journals. *Academic medicine : journal of the Association of American Medical Colleges*. 2011;86(8):946-952.
25. Bickel J, Ruffin A. Gender-associated differences in matriculating and graduating medical students. *Academic medicine : journal of the Association of American Medical Colleges*. 1995;70(6):552-559.
26. Ramsden P. Describing and explaining research productivity. *Higher Education*. 1994;28(2):207-226.
27. Cikara M, Rudman L, Fiske S. Dearth by a Thousand Cuts? Accounting for Gender Differences in Top-Ranked Publication Rates in Social Psychology. *The Journal of social issues*. 2012;68(2):263-285.
28. van den Besselaar P, Sandstrom U. Gender differences in research performance and its impact on careers: a longitudinal case study. *Scientometrics*. 2016;106:143-162.
29. West JD, Jacquet J, King MM, Correll SJ, Bergstrom CT. The role of gender in scholarly authorship. *PloS one*. 2013;8(7):e66212.
30. Figg WD, Dunn L, Liewehr DJ, et al. Scientific collaboration results in higher citation rates of published articles. *Pharmacotherapy*. 2006;26(6):759-767.
31. Schisterman EF, Swanson CW, Lu YL, Mumford SL. The changing face of epidemiology: gender disparities in citations? *Epidemiology (Cambridge, Mass.)*. 2016;28(2):159-168.
32. Symonds MR, Gemmell NJ, Braisher TL, Gorringer KL, Elgar MA. Gender differences in publication output: towards an unbiased metric of research performance. *PloS one*. 2006;1:e127.
33. Garfield E. The evolution of the Science Citation Index. *International microbiology : the official journal of the Spanish Society for Microbiology*. 2007;10(1):65-69.
34. Reed DA, Enders F, Lindor R, McClees M, Lindor KD. Gender differences in academic productivity and leadership appointments of physicians throughout academic careers. *Academic medicine : journal of the Association of American Medical Colleges*. 2011;86(1):43-47.
35. Brooks J, Della Sala S. Re-addressing gender bias in Cortex publications. *Cortex; a journal devoted to the study of the nervous system and behavior*. 2009;45(10):1126-1137.
36. Neuroscience N. Women in neuroscience: a numbers game. *Nature neuroscience*. 2006;9(7):853.

- 1  
2  
3 **37.** Leopold TA. The Global Gender Gap Report 2016. World Economic Forum. 2016.  
4 **38.** Iwao S. The Japanese woman : traditional image and changing reality / Sumiko Iwao.  
5 New York : Toronto : New York: Free Press ; Maxwell Macmillan Canada ; Maxwell  
6 Macmillan International; 1993.  
7 **39.** Childs S, Mona LK. Critical Mass Theory and Women's Political Representation.  
8 Political Studies. 2008;56(3):725-736.  
9 **40.** Mueller CM, Gaudilliere DK, Kin C, Menorca R, Girod S. Gender disparities in scholarly  
10 productivity of US academic surgeons. Journal of Surgical Research. 2016;203(1):28-  
11 33.  
12 **41.** Kaufman RR, Chevan J. The gender gap in peer-reviewed publications by physical  
13 therapy faculty members: a productivity puzzle. Physical therapy. 2011;91(1):122-  
14 131.  
15  
16  
17  
18  
19  
20  
21  
22  
23  
24  
25  
26  
27  
28  
29  
30  
31  
32  
33  
34  
35  
36  
37  
38  
39  
40  
41  
42  
43  
44  
45  
46  
47  
48  
49  
50  
51  
52  
53  
54  
55  
56  
57  
58  
59  
60

## Figure Legends

**Fig 1: Time trend of female authorships on the global level.** (A) The relative frequency of female authorships (FAP, bottom), the pattern of FAORs (with FAOR-triplet, top) and its associated Prestige Index (PI) are depicted by year and averaged over time. The averaged FAOR distribution is characterized by the FAOR-pattern (+, +, -), i.e. women have significantly higher odds for first and co-authorships and significantly lower odds for last-authorships. The slightly negative PI indicates a lack of prestigious authorships held by women. (B) The FAP exhibits a relatively high increase as documented by its average annual growth rate (AAGR) of 1.74% per year with the highest rate for last authorships (2.97%). Overall, this led to more gender-neutrality in authorships odds during the recent years.

1  
2  
3 **Fig 2: Female authorships by authors per article.** Although the FAORs for first and last  
4 authorships have the tendency to slightly increase and decrease, respectively, with an  
5 increasing number of authors, this trend is reversed for higher author rates (>12  
6 authors/article). FAP, FAORs and Prestige Index show no clear correlation to the number of  
7 authors per article.  
8  
9  
10  
11  
12  
13  
14  
15  
16  
17  
18  
19  
20  
21  
22  
23  
24  
25  
26  
27  
28  
29  
30  
31  
32  
33  
34  
35  
36  
37  
38  
39  
40  
41  
42  
43  
44  
45  
46  
47  
48  
49  
50  
51  
52  
53  
54  
55  
56  
57  
58  
59  
60

1  
2  
3 **Fig 3: Gender-specificity of citations & scholarly productivity.** (A) The descendingly ordered  
4 citation rates show that articles with male key authorships are slightly more frequently cited  
5 than articles with female key authorships. The mean citation rate of 9.2 citations/article is  
6 depicted by a dotted line (Kruskal-Wallis test, (\*):  $P < .05$  (\*\*):  $P < .01$ ). (B) Average citation  
7 rates of ungrouped articles (bars) and articles that were grouped by the gender of their key  
8 authorships (lines), depicted as a function of the number of authors. Statistically, the citation  
9 rate of an article is higher the more authors are involved. The gender-specific differences in  
10 citation rates are not preserved across the different levels of author count. (C) Gender-  
11 specific distribution of the article count per author. Women dominate the sub-groups  
12 'author has one or two article(s)'. All other sub-groups are characterized by a relatively over-  
13 representation of male authors. This finding correlates with the higher productivity of male  
14 authors, as 52.8% male authors are responsible for 57.0% of all authorships.  
15  
16  
17  
18  
19  
20  
21  
22  
23  
24  
25  
26  
27  
28  
29  
30  
31  
32  
33  
34  
35  
36  
37  
38  
39  
40  
41  
42  
43  
44  
45  
46  
47  
48  
49  
50  
51  
52  
53  
54  
55  
56  
57  
58  
59  
60



1  
2  
3 **Fig 4: Linear projection of the development of female authorships on the global level.** The  
4  
5 prognosis for the next decades forecasts a further harmonization of authorship odds  
6  
7 between the two genders with an almost gender-neutral distribution of prestigious  
8  
9 authorships in 2026 (*Prestige Index* = -0.03). An FAP of 54.3% is prognosticated for the year  
10  
11  
12 2026.  
13  
14  
15  
16  
17  
18  
19  
20  
21  
22  
23  
24  
25  
26  
27  
28  
29  
30  
31  
32  
33  
34  
35  
36  
37  
38  
39  
40  
41  
42  
43  
44  
45  
46  
47  
48  
49  
50  
51  
52  
53  
54  
55  
56  
57  
58  
59  
60

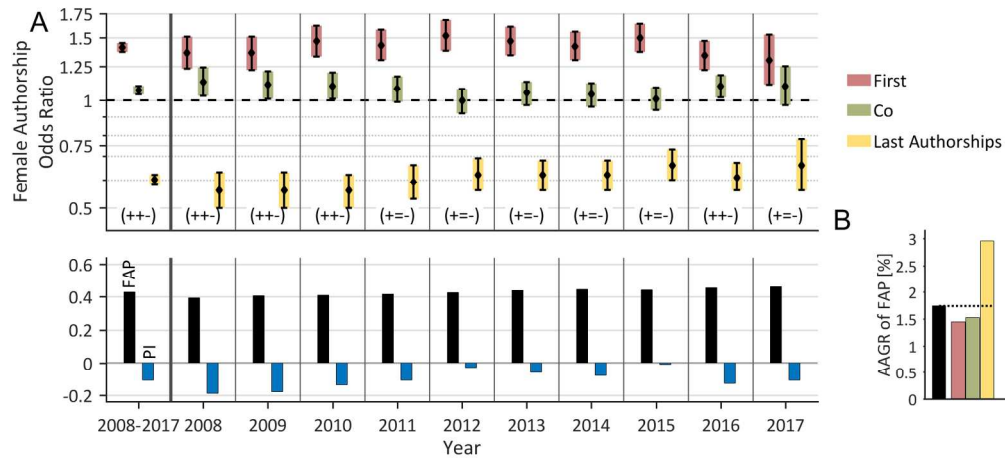

Fig 1: Time trend of female authorships on the global level. (A) The relative frequency of female authorships (FAP, bottom), the pattern of FAORs (with FAOR-triplet, top) and its associated Prestige Index (PI) are depicted by year and averaged over time. The averaged FAOR distribution is characterized by the FAOR-pattern (+, +, -), i.e. women have significantly higher odds for first and co-authorships and significantly lower odds for last-authorships. The slightly negative PI indicates a lack of prestigious authorships held by women. (B) The FAP exhibits a relatively high increase as documented by its average annual growth rate (AAGR) of 1.74% per year with the highest rate for last authorships (2.97%). Overall, this led to more gender-neutrality in authorships odds during the recent years.

160x74mm (300 x 300 DPI)

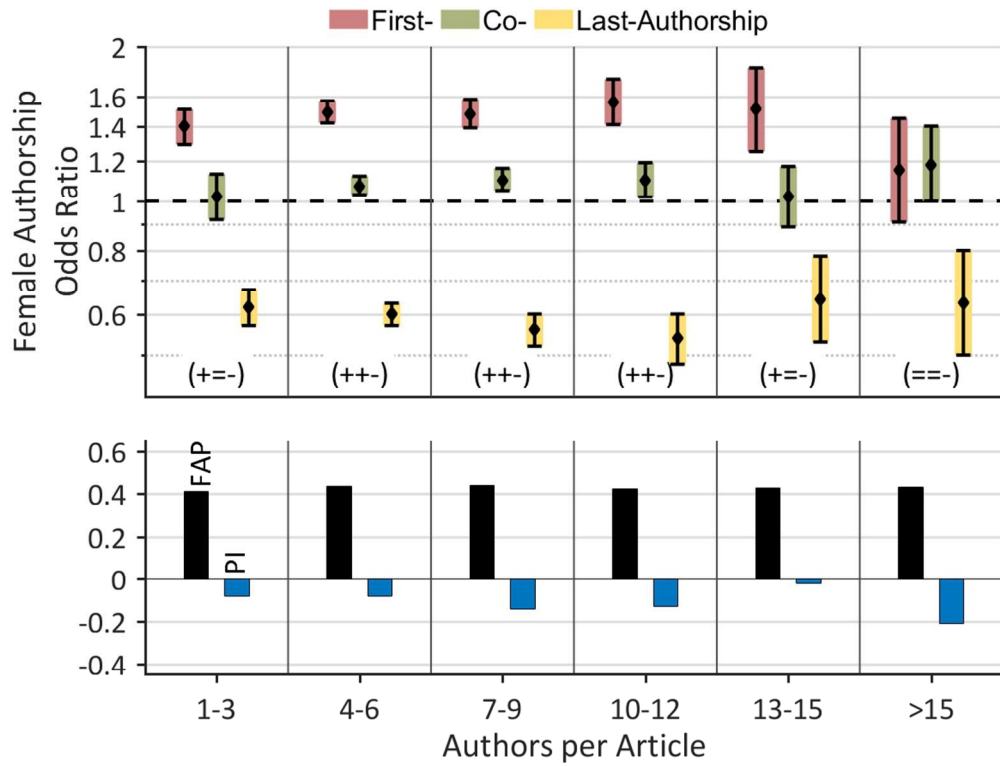

Fig 2: Female authorships by authors per article. Although the FAORs for first and last authorships have the tendency to slightly increase and decrease, respectively, with an increasing number of authors, this trend is reversed for higher author rates (>12 authors/article). FAP, FAORs and Prestige Index show no clear correlation to the number of authors per article.

98x74mm (300 x 300 DPI)

Only

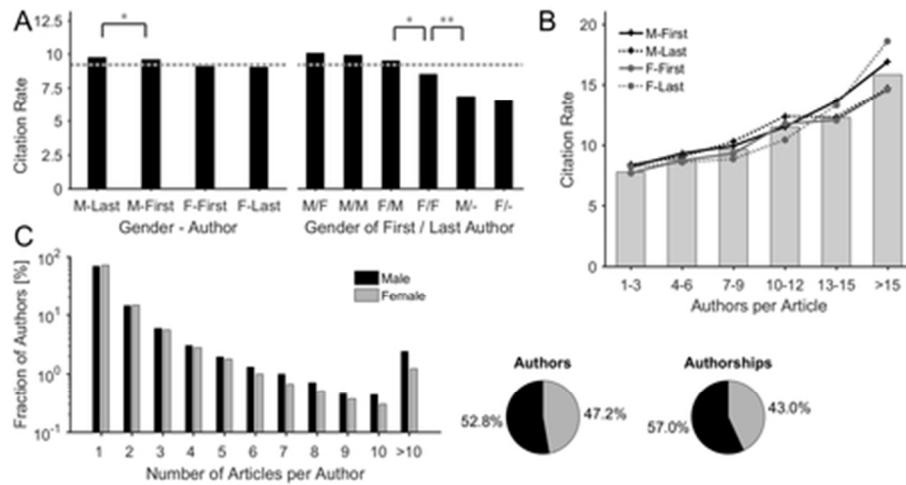

Fig 3: Gender-specificity of citations & scholarly productivity. (A) The descendingly ordered citation rates show that articles with male key authorships are slightly more frequently cited than articles with female key authorships. The mean citation rate of 9.2 citations/article is depicted by a dotted line (Kruskal-Wallis test, (\*):  $P < .05$  (\*\*):  $P < .01$ ). (B) Average citation rates of ungrouped articles (bars) and articles that were grouped by the gender of their key authorships (lines), depicted as a function of the number of authors. Statistically, the citation rate of an article is higher the more authors are involved. The gender-specific differences in citation rates are not preserved across the different levels of author count. (C) Gender-specific distribution of the article count per author. Women dominate the sub-groups 'author has one or two article(s)'. All other sub-groups are characterized by a relatively over-representation of male authors. This finding correlates with the higher productivity of male authors, as 52.8% male authors are responsible for 57.0% of all authorships.

38x20mm (300 x 300 DPI)

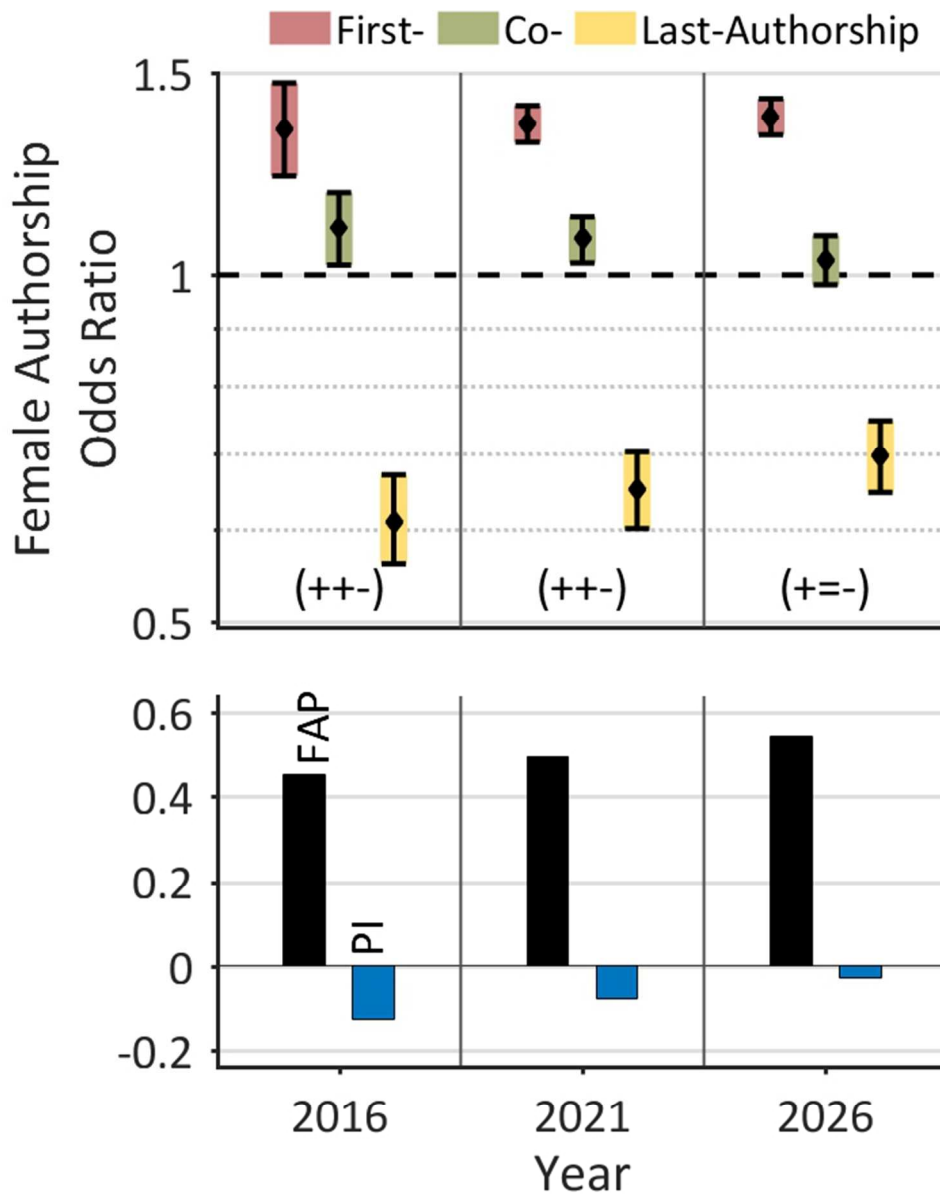

Fig 4: Linear projection of the development of female authorships on the global level. The prognosis for the next decades forecasts a further harmonization of authorship odds between the two genders with an almost gender-neutral distribution of prestigious authorships in 2026 (Prestige Index = -0.03). An FAP of 54.3% is prognosticated for the year 2026.

59x74mm (300 x 300 DPI)

## Online Supplement

# Gender disparities in high-quality dermatology research - a study on scientific authorships

Michael H. K. Bendels<sup>1</sup>, Michelle C. Dietz<sup>1</sup>, Dörthe Brüggmann<sup>1</sup>, Gerhard M. Oremek<sup>1</sup>, Norman Schöffel\*<sup>1</sup>, and David A. Groneberg\*<sup>1</sup>

<sup>1</sup>Division of Computational Medicine, Institute of Occupational, Social, and Environmental Medicine, Goethe University Frankfurt, Germany

### Correspondence:

Dr. med. Dr. rer. nat. Michael H.K. Bendels, MD, PhD

### Postal Address:

Theodor-Stern-Kai 7

60590 Frankfurt

Germany

Phone: +49-69-6301-6650

Fax: +49-69-6301-7053

email: michael.bendels@outlook.com

[www.asu.med.uni-frankfurt.de](http://www.asu.med.uni-frankfurt.de)

### Content:

**SFig 1: Bibliometric overview.**

**SFig 2: Gender Detection Output by Time.**

**SFig 3: Quality of algorithmic gender detection by country.**

**SFig 4: Probability density function of the citation rate.**

**SFig 5: Test for alphabetical ordering of the author list.**

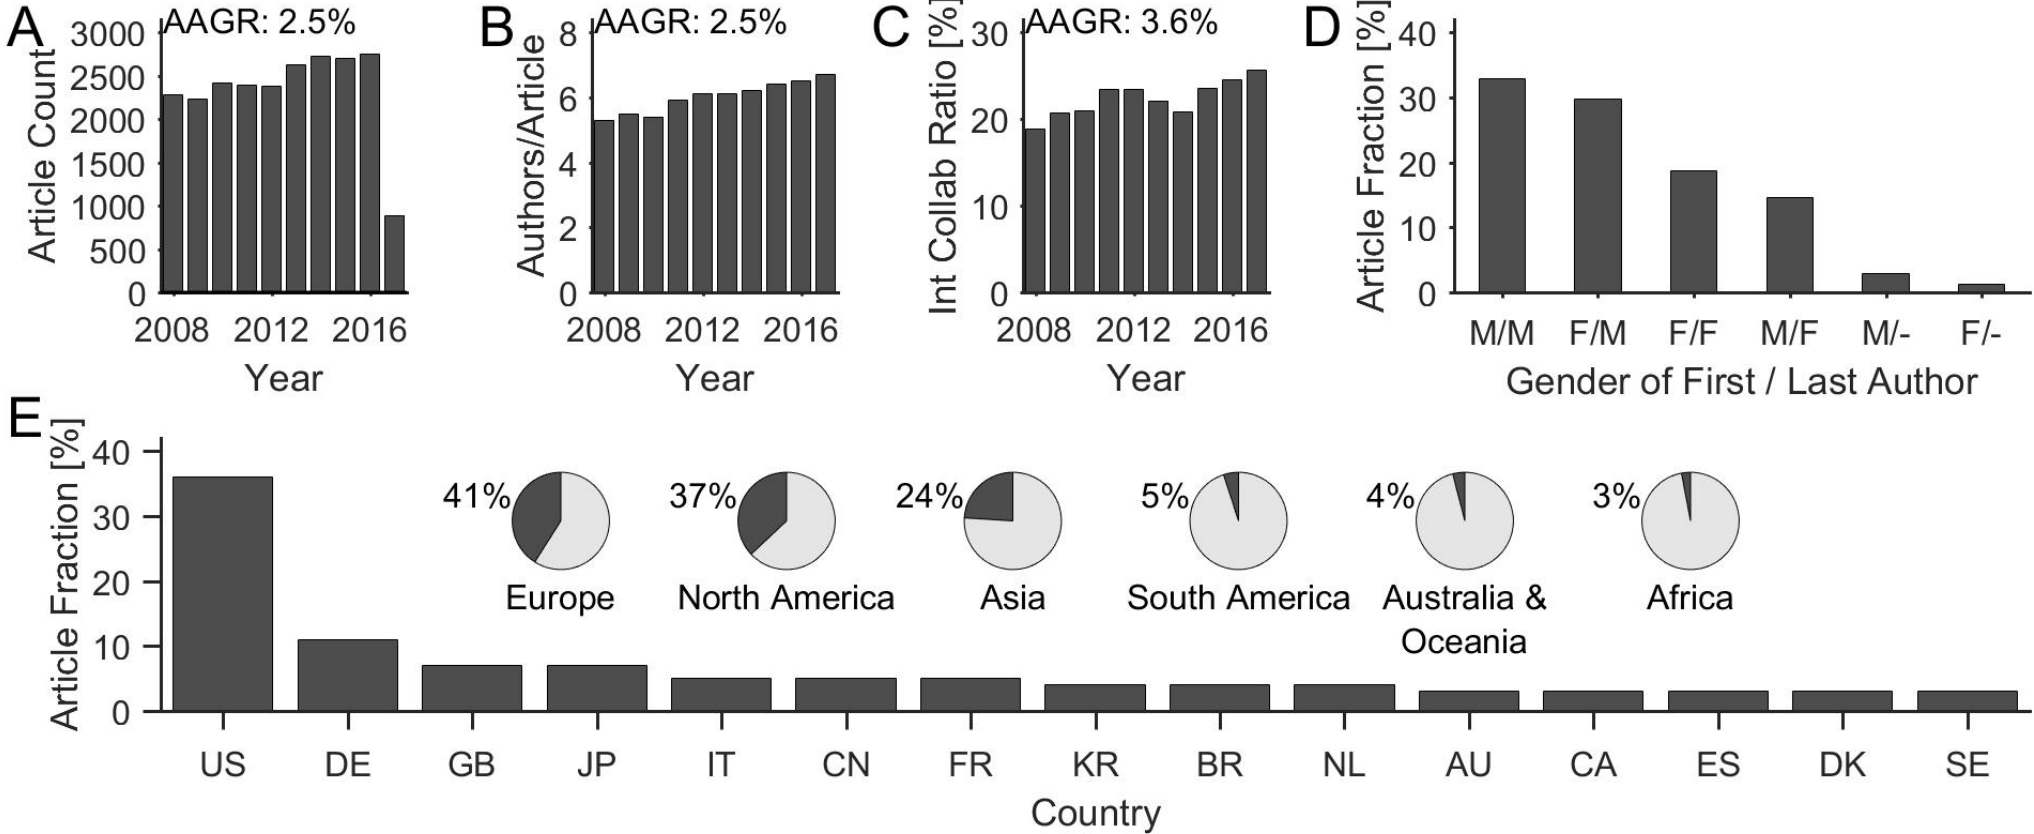

**SFig 1: Bibliometric overview.** (A) The article count increases from 2,281 in 2008 to 2,750 in 2015; the average annual growth rate (AAGR) is 2.5%. (B) The number of authors per article increases from 5.3 authors/article in 2008 to 6.7 authors/article in 2017. (C) The percentage of international collaboration articles increases from 18.9% in 2008 to 25.6% in 2017 with an AAGR of 3.6%. (D) The fraction of articles grouped the gender of their key authors' documents a quantitative superiority of articles with male last authorships. (E) The fraction of articles is depicted by country (bar plot) and by continent (pie charts). Please note that the sum of percentages is greater than one due to international collaborations. AU=Australia, BR=Brazil, CA=Canada, CH=Switzerland, CN=China, DE=Germany, DK=Denmark, ES=Spain, FR=France, GB=United Kingdom, IT=Italy, KR=South Korea, NL=Netherlands, SE=Sweden, US=United States.

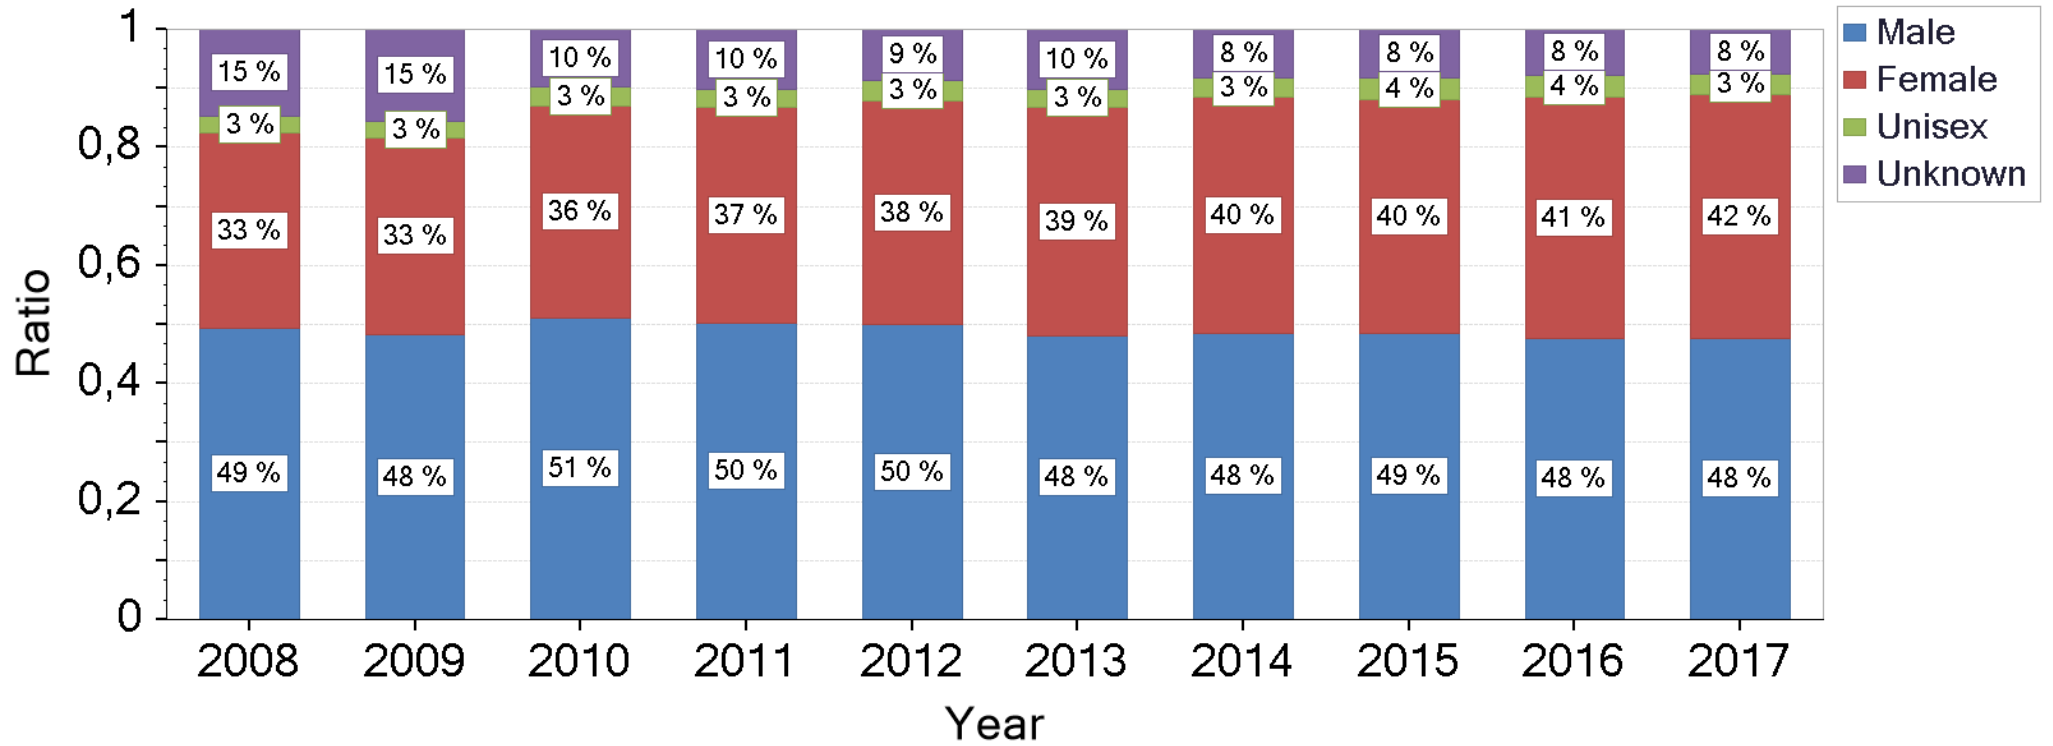

**Sfig 2: Gender Detection Output by Time.** The ratios of detected male, female, unisex and undefined authorships ordered by publication year document a relatively small inter-annual variability.



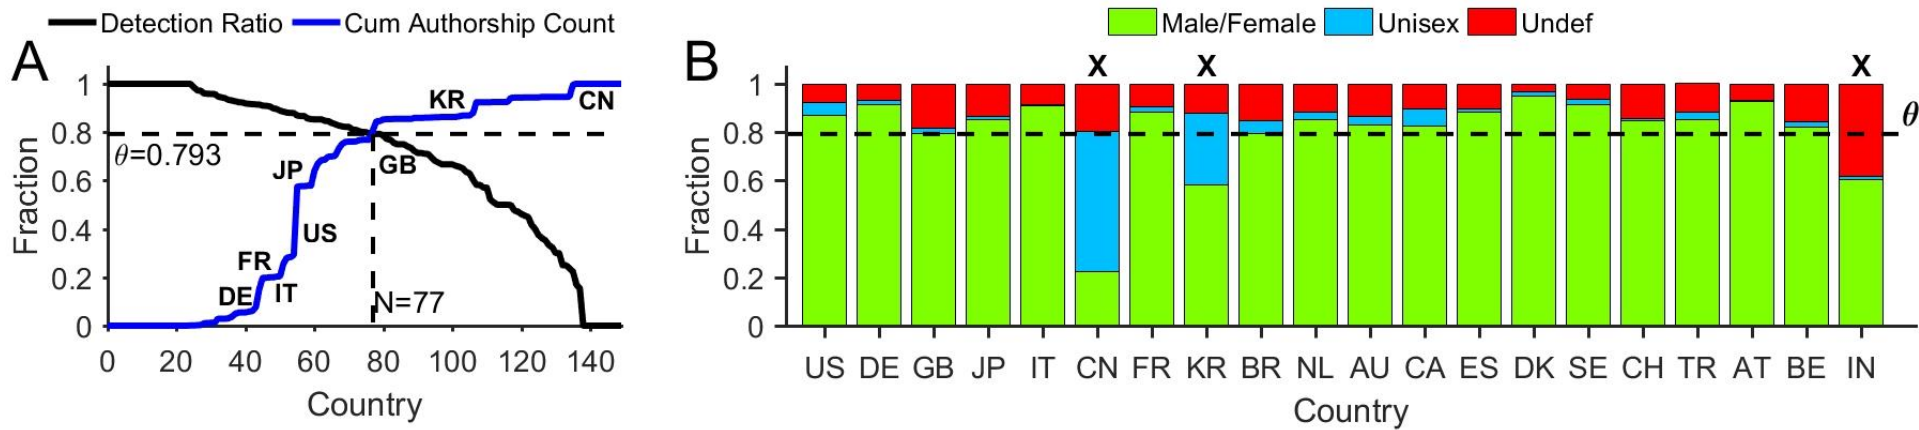

**Sfig 3: Quality of algorithmic gender detection by country.** (A) An adaptive threshold country criterion  $\theta$  for the inclusion of a country in the country-specific gender analysis was defined by a ROC-like curve incorporating both detection ratio and cumulative author count [1]. In this study, countries with a detection rate of at least  $\theta = 0.793$  male + female authors (i.e. 79.3% of all authorships) from N=77 countries were included in the country-specific analysis. Countries with a large amount of authors are indicated by country code. (B) The result of the algorithmic gender detection - classified as male/female, unisex or undefined - grouped by countries that are ordered in descending order by their publication count, documents a relative high frequency of male/female authors for most of the top 20 countries, with the exception of the Asian countries China (CN), South Korea (KR), and India (IN). The latter countries are characterized by a high frequency of unisex (CH, KR) or unknown names (IN) and are excluded (X) from analysis due to the threshold criterion  $\theta$  (dotted line). AU=Australia, AT=Austria, BE=Belgium, BR=Brazil, CA=Canada, CH=Switzerland, CN=China, DE=Germany, DK=Denmark, ES=Spain, FR=France, GB=United Kingdom, IL=Israel, IN=India, IT=Italy, JP=Japan, KR=South Korea, NL=Netherlands, SG=Singapore, SE=Sweden, TR=Turkey, US=United States.

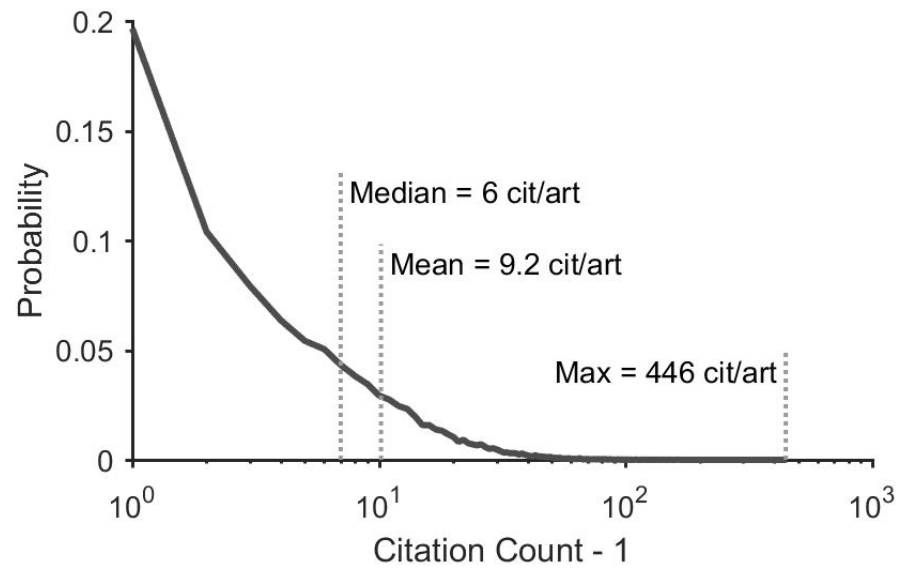

**SFig 4: Probability density function of the citation rate.** The semi-logarithmic plot of the citation count per article (=citation rate) exhibits an exponential-like decreasing probability density function with a mean citation rate of 9.2 citations/article.

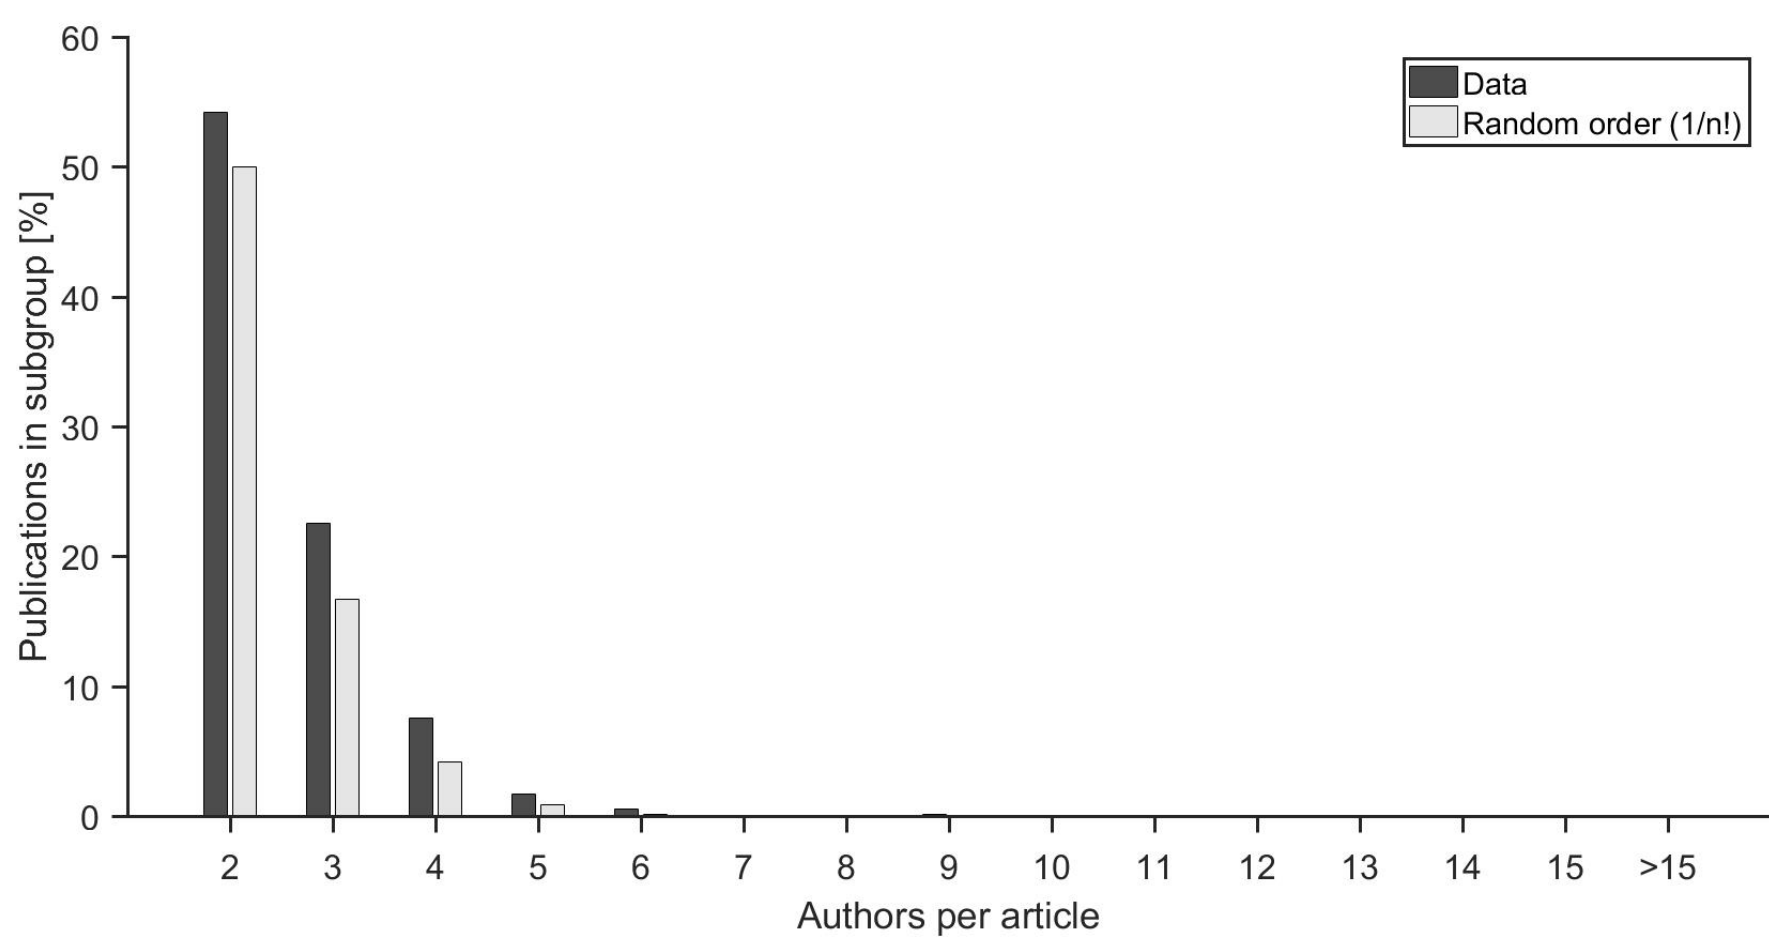

**SFig 5: Test for alphabetical ordering of the author list.** The proportion of publications with an alphabetic ordered author list is depicted with respect to the authors per article (blue). The values correspond very closely to those obtained for randomly ordered author lists (yellow).

## References

1. Bendels MHK, Brüggmann D, Schöffel N, Groneberg DA. Gendermetrics.NET: a novel software for analyzing the gender representation in scientific authoring. J Occup Med Toxicol. 2016;11:43.

For peer review only

# BMJ Open

## Gender disparities in high-quality dermatology research – a study on scientific authorships

|                                 |                                                                                                                                                                                                                                                                                                                                                                                                                                                                                                                                                                                                                                                                                                                                                                                                                                                         |
|---------------------------------|---------------------------------------------------------------------------------------------------------------------------------------------------------------------------------------------------------------------------------------------------------------------------------------------------------------------------------------------------------------------------------------------------------------------------------------------------------------------------------------------------------------------------------------------------------------------------------------------------------------------------------------------------------------------------------------------------------------------------------------------------------------------------------------------------------------------------------------------------------|
| Journal:                        | <i>BMJ Open</i>                                                                                                                                                                                                                                                                                                                                                                                                                                                                                                                                                                                                                                                                                                                                                                                                                                         |
| Manuscript ID                   | bmjopen-2017-020089.R1                                                                                                                                                                                                                                                                                                                                                                                                                                                                                                                                                                                                                                                                                                                                                                                                                                  |
| Article Type:                   | Research                                                                                                                                                                                                                                                                                                                                                                                                                                                                                                                                                                                                                                                                                                                                                                                                                                                |
| Date Submitted by the Author:   | 30-Jan-2018                                                                                                                                                                                                                                                                                                                                                                                                                                                                                                                                                                                                                                                                                                                                                                                                                                             |
| Complete List of Authors:       | Bendels, Michael; Goethe-Universität Frankfurt am Main, Institute of Occupational Medicine, Social Medicine and Environmental Medicine<br>Dietz, Michelle; Goethe-Universität Frankfurt am Main, Institute of Occupational Medicine, Social Medicine and Environmental Medicine<br>Brüggmann, Dörthe; Goethe-Universität Frankfurt am Main, Institute of Occupational Medicine, Social Medicine and Environmental Medicine<br>Oremek, Gerhard; Goethe-Universität Frankfurt am Main, Institute of Occupational Medicine, Social Medicine and Environmental Medicine<br>Schöffel, Norman; Goethe-Universität Frankfurt am Main, Institute of Occupational Medicine, Social Medicine and Environmental Medicine<br>Groneberg, David; Goethe-Universität Frankfurt am Main, Institute of Occupational Medicine, Social Medicine and Environmental Medicine |
| <b>Primary Subject Heading</b>: | Dermatology                                                                                                                                                                                                                                                                                                                                                                                                                                                                                                                                                                                                                                                                                                                                                                                                                                             |
| Secondary Subject Heading:      | Medical publishing and peer review                                                                                                                                                                                                                                                                                                                                                                                                                                                                                                                                                                                                                                                                                                                                                                                                                      |
| Keywords:                       | odds ratio, prestige, citations, productivity, career                                                                                                                                                                                                                                                                                                                                                                                                                                                                                                                                                                                                                                                                                                                                                                                                   |
|                                 |                                                                                                                                                                                                                                                                                                                                                                                                                                                                                                                                                                                                                                                                                                                                                                                                                                                         |

SCHOLARONE™  
Manuscripts



# Gender disparities in high-quality dermatology research - a study on scientific authorships

Michael H. K. Bendels<sup>1</sup>, Michelle C. Dietz<sup>1</sup>, Dörthe Brüggmann<sup>1</sup>, Gerhard M. Oremek<sup>1</sup>,  
Norman Schöffel<sup>1\*</sup>, and David A. Groneberg<sup>1\*</sup>

<sup>1</sup>Goethe-Universität Frankfurt am Main, Institute of Occupational Medicine, Social Medicine  
and Environmental Medicine, Division of Computational Medicine

\*: equally distributed

Correspondence:

Dr. med. Dr. rer. nat. Michael H.K. Bendels, MD, PhD  
Consultant Neurologist, Consultant Occupational Physician, Computer Scientist (TU Berlin)  
Postal Address:  
Theodor-Stern-Kai 7  
60590 Frankfurt  
Germany

Phone: +49-69-6301-6650  
Fax: +49-69-6301-7053  
email: [bendels@med.uni-frankfurt.de](mailto:bendels@med.uni-frankfurt.de)  
[www.asu.med.uni-frankfurt.de](http://www.asu.med.uni-frankfurt.de)

## List of Abbreviations

**AAGR:** Average Annual Growth Rate

**FAOP:** Proportion of Female Authorships

**FAP:** Female Authorship Ratio

**PI:** *Prestige Index*

For peer review only

## Abstract

**Objective:** The present study aims to elucidate the state of gender equality in high-quality dermatological research by analyzing the representation of female authorships from January, 2008 to May, 2017.

**Design:** Retrospective, descriptive study.

**Setting:** 113,189 male and female authorships from 23,373 research articles published in twenty-three dermatological Q1 journals were analyzed with the aid of the Gendermetrics Platform.

**Results:** 43.0% of all authorships and 50.2% of the first-, 43.7% of the co- and 33.1% of the last-authorships are held by women. The corresponding female-to-male odds ratios are 1.41 (CI: 1.37-1.45) for first authorships, 1.07 (CI: 1.04-1.10) for co-authorships and 0.60 (CI: 0.58-0.62) for last authorships. The annual growth rates are 1.74% overall and 1.45% for first authorships, 1.53% for co-authorships, and 2.97% for last authorships. Women are slightly underrepresented at prestigious authorships compared to men (Prestige Index = -0.11). The underrepresentation remains stable in highly competitive articles attracting the highest citation rates, namely, articles with many authors and articles that were published in highest-impact journals. Multi-author articles with male key authors are only slightly more frequently cited than those with female key authors. Women publish slightly fewer papers compared to men (47.2% women hold 43.0% of the authorships). At the level of individual journals, there is a high degree of uniformity in gender-specific authorship odds. By contrast, distinct differences at country level were revealed. The prognosis for the next decades forecasts a consecutive harmonization of authorship odds between the two genders.

**Conclusions:** In high-quality dermatological research, the integration of female scholars is advanced as compared to other medical disciplines. A gender gap consists mainly in the form of a career dichotomy, with many female early career researchers and few women in



1  
2  
3 academic leadership positions. However, this gender gap has been narrowed in the last  
4  
5 decade and will likely be further reduced in the future.  
6  
7  
8  
9

10 **Keywords:** odds ratio; prestige; citations; productivity; career  
11  
12  
13  
14  
15

### 16 **Strengths and limitations of this study**

- 17 • The Gendermetrics Platform is a well-established system to analyze gender  
18 disparities in science by considering the gender-specific distribution of first, co- and  
19 last authorships.  
20  
21  
22
- 23 • The purely bibliometric and algorithmic approach allows analyses of large volumes of  
24 data standardized and independent of the examiner, and thus with a minimized  
25 interindividual variability.  
26  
27  
28
- 29 • Our analysis is limited by the absence of information concerning equally distributed  
30 authorships, corresponding authors, as well as data providing information about the  
31 scholar's academic degree, their position, age, employment status and their  
32 participation on editorial boards.  
33  
34  
35
- 36 • The investigation period is technically limited to articles that are published after 2006  
37 due to the predominance of initials preventing a correct gender identification by first  
38 names in older articles.  
39  
40  
41  
42  
43  
44  
45  
46  
47  
48  
49  
50  
51  
52  
53  
54  
55  
56  
57  
58  
59  
60

## Introduction

The past decades have seen an enormous increase in the number of women entering medicine<sup>1</sup>: While in 1969, 6.9% of the U.S. medical graduates were women, the percentage reached a value of 47.5% in 2014<sup>2</sup>. The enrollment in U.S. medical school in 2016 was almost evenly divided between women (49.8%) and men (50.2%)<sup>3</sup>. Despite this enormous increase of women entering the field of medicine, "across medicine and dermatology, this influx has not been accompanied by a parallel progress by female faculty with academic credentials or in leadership roles", as stated by an editorial of Alexa Kimball<sup>4</sup> and many articles have addressed different gender and generational aspects in academic dermatology in the past years<sup>5-9</sup>. In 2012, Sadeghpour et al. published results from a national survey on the role of gender in academic dermatology<sup>1</sup>. They assessed whether there is an association between gender and academic rank. They came to the conclusion that gender-based differences in academic dermatology, including career track, academic rank distribution, leadership, and career satisfaction, persist<sup>1</sup>. Of a total of 259 full-time US academic dermatologists (38.6% were female), they found that men held more senior positions even after adjustment for age and number of years since completion of residency<sup>1</sup>. Working hours did not differ significantly. While most men (90.3%) and women (82.8%) were satisfied with their career, women were 24.6% more likely than men to consider leaving academia<sup>1</sup>. In line with these findings, Shi et al. conducted in 2017 a cross-sectional observational study of dermatology departments and divisions in the U.S. revealing that women account for 47.9% of dermatology residency program directors (PD) but comprise only 23.5% of chairpersons/chiefs<sup>10</sup>. Another recent study investigates the influence of women in academic dermatology by assessing the number of women acting as editors-in-chief of prominent dermatology journals<sup>11</sup>. The study revealed that there have been 26 female editors and at least 128 male editors in the considered 25 dermatology journals and that

1  
2  
3 45.8% of journals have not yet had a female editor<sup>11</sup>. Moreover, the study clearly showed  
4  
5 that in the last decades there has been an increase in the number of women holding these  
6  
7 prestigious positions.  
8

9  
10 As stated previously, an indicator for the balance between integration of female and male  
11  
12 dermatologists and scientists is the quantification of their scholastic activity as represented  
13  
14 by "authorship" in scientific publications<sup>12-15</sup>. In general, authorships represent the currency  
15  
16 system of research and academic community<sup>16</sup>. In original medical articles, the assignment  
17  
18 of authorship follows, by convention, the rule that "the first author indicates the person  
19  
20 whose work underlies the paper as a whole"<sup>17</sup>, whereas the last authorship "indicates a  
21  
22 person whose work or role made the study possible without necessarily doing the actual  
23  
24 work"<sup>17</sup>. Thus, the assignment of authorships differs considerably from, for example,  
25  
26 economics or mathematics, where authors are usually listed in alphabetical order<sup>16</sup>. One  
27  
28 consequence is that an early-career researcher normally publishes as first or co-author,  
29  
30 whereas a senior researcher prefers the last author position in original research articles<sup>18,19</sup>.  
31  
32 A further consequence of this assignment rule is that the different types of authorships are  
33  
34 associated with different prestige. Specifically, first and last authorships have a significantly  
35  
36 higher reputation than co-authorships<sup>18</sup>.  
37  
38  
39  
40  
41  
42  
43  
44

45 Based on these consideration, we here applied the recently established Gendermetrics  
46  
47 Platform<sup>20</sup> to analyze the integration of women in high-quality dermatological research by  
48  
49 assessing 113,189 male and female authorships from twenty-three dermatological Q1  
50  
51 journals.  
52

53  
54 Conceptually, we determined the proportion of female first, co- and last authorships and  
55  
56 quantified the relative distribution of female authorships among the different authorships  
57  
58

1  
2  
3 compared to men by applying odds ratios. Moreover, we used the *Prestige Index* to analyze  
4  
5 the distribution of prestigious authorships between the two genders. The analysis includes  
6  
7 global status and temporal development, differences across countries and the role women  
8  
9 tend to have in articles with many authors, e.g. collaboration on articles <sup>14</sup>. Moreover, a  
10  
11 gender-specific analysis of scholarly productivity and citation rate was conducted. The study  
12  
13 concludes with a ten-year forecast regarding the development of gender disparities in the  
14  
15 field of high-quality dermatological research.  
16  
17  
18  
19  
20  
21  
22  
23  
24  
25  
26  
27  
28  
29  
30  
31  
32  
33  
34  
35  
36  
37  
38  
39  
40  
41  
42  
43  
44  
45  
46  
47  
48  
49  
50  
51  
52  
53  
54  
55  
56  
57  
58  
59  
60

## Methods

### Data acquisition & integration

The data analysis was conducted using Gendermetrics.NET<sup>20</sup>, a SQL-Server based Platform for analyzing bibliometric data with a special emphasis on gender aspects. Research articles from high impact dermatology journals listed in the Scimago Journal & Country Rank database (<http://www.scimagojr.com/journalrank.php?category=2708>) were acquired on May 15, 2017 from the Web of Science Core Collection (Thomson Reuters). The journals constitute the subset of dermatological Q1 journals in 2016 representing the top 25% of the corresponding impact factor distribution. The journals '*Fibrogenesis and Tissue Repair*', '*Infectious Diseases in Obstetrics and Gynecology*' and '*Dermatology and Therapy*' were not considered because there were not indexed in the Web of Science database. The journals '*Aids Research and Treatment*', '*BMC Dermatology*', '*Clinics in Dermatology*', '*Dermato-Endocrinology*' and '*HIV/AIDS-Research and Palliative Care*' were excluded from analysis due to a low number of articles (< 200 articles). Furthermore, the journals '*British Journal of Dermatology*' and '*Journal of the European Academy of Dermatology and Venereology*' had to be excluded from analysis due to the predominant usage of initials instead of full first names, which prevents the correct gender determination. In total, 23 of the 33 dermatological Q1-journals with 23,373 articles written by 74,354 authors remain for analysis.

### Gender determination

The algorithmic gender determination operates on the basis of a data table containing the gender of 77,818 forenames (male, female or unisex), see Bendels et al.<sup>20</sup>. By applying the algorithm, 30,538 (= 41.1%) male authors, 27,261 (= 36.7%) female authors, 5,509 (= 7.4%) unisex authors and 11,046 (= 14.9%) undefined authors were determined with a relatively little inter-annual variability (supplementary Fig. 1). The Unisex and undefined authors and

1  
2  
3 their authorships were not taken into consideration (in total 27,182 authorships). As a result,  
4  
5 113,189 male and female authorships affiliated to institutions from 150 countries were  
6  
7 analyzed. The research output of a country was thereby benchmarked by considering the  
8  
9 authorships of the related institutions<sup>14</sup>. It is important to note, that the quality of gender  
10  
11 detection depends on the authorships country as illustrated by supplementary Fig. 2. In  
12  
13 order to ensure the validity of the *country-specific* analysis, we set a threshold criterion for  
14  
15 the country-specific analysis (supplementary Fig. 2), as recently described in Bendels et al.<sup>20</sup>.  
16  
17 In particular, only countries with a detection rate of at least 79.3% male or female  
18  
19 authorships were considered. As a result, among the top 20 most productive countries, the  
20  
21 Asian countries China, South Korea (with high rates of unisex names) and India (with many  
22  
23 undefined names) were excluded. A bibliometric overview is given in supplementary Fig. 3.  
24  
25  
26  
27

### 28 **Proportion of Female Authorships (FAP) & Female Authorship Odds Ratio (FAOR)**

29 In this study, first-, co- and last-authorships were considered, whereby co-authorships  
30  
31 encompasses all authorships between *one* first- and *one* last-authorship. Equally distributed  
32  
33 authorships were not considered due to a lack of information. The ***proportion of female***  
34  
35 ***authorships (FAP)*** is defined as the quotient between the female authorship count and the  
36  
37 total sum of male and female authorships. The FAP is presented as a percentage to improve  
38  
39 the textual readability. The female to male odds ratios for first-, co- and last-authorships  
40  
41 were determined (***female authorship odds ratio, FAOR***) with the corresponding confidence  
42  
43 intervals at a confidence level of 95%<sup>14</sup>. The FAOR measures the female odds of securing a  
44  
45 particular authorship type compared to men. A FAOR of e.g. 2.0 or 0.5 means that women or  
46  
47 men, respectively, have twice the odds of holding a particular authorship compared to  
48  
49 respective other gender<sup>14</sup>. For a simplified representation, a triplet is used to indicate the  
50  
51 sign of the *significant* female odds ratio excess to get a particular authorship. For example,  
52  
53  
54  
55  
56  
57  
58  
59  
60

1  
2  
3 the FAOR-triplet (-, =, +) indicates that women have *significantly* lower odds ratios for first-,  
4  
5 equal odds ratios for co- and significantly higher odds ratios for last-authorships compared  
6  
7 to men<sup>14</sup>. In summary, the FAP measures the quantitative representation of female  
8  
9 authorships, whereas the FAORs quantify the relative distribution of female authorships  
10  
11 among the different authorships<sup>14</sup>. To increase the statistical significance, the FAP/FAOR-  
12  
13 classification is only conducted for subjects (e.g. countries, journals) with at least 750 male  
14  
15 or female authorships.  
16  
17

### 18 19 20 **Prestige Index**

21 The *Prestige Index* measures the female odds of holding prestigious authorships compared  
22  
23 to men<sup>14</sup>. It is defined as the prestige-weighted average of the FAOR excess  $\varepsilon_t$  that is  
24  
25 calculated over all authorship types  $t$  (i.e. for first, co- and last authorships),  $\varepsilon_t = w_t (\text{FAOR}_t -$   
26  
27  $1)$ , if  $\text{FAOR}_t \geq 1$ , otherwise  $\varepsilon_t = w_t (1 - 1/\text{FAOR}_t)$  with the weighting factor  $w_t$ <sup>14</sup>. In medical  
28  
29 science, the prestige of scholarships follows a ranked order with a higher reputation of first  
30  
31 and last authorships and a lower reputation of co-authorships<sup>18</sup>. Specifically, a potentially  
32  
33 alphabetical ordering of the author list was excluded by an additional test (supplementary  
34  
35 Fig. 4). Therefore, co-authorships were weighted negatively ( $w_{\text{co}} = -1$ ), whereas first and last  
36  
37 authorships were weighted positively ( $w_{\text{first}} = w_{\text{last}} = 1$ )<sup>14</sup>. This definition implies that the  
38  
39 *Prestige Index* is e.g. lowered by both higher odds for co-authorships and lower odds for first  
40  
41 and last authorships. A value of 0 characterizes a balanced distribution of prestigious  
42  
43 authorships between the two genders, whereas a value above (below) 0 indicates an excess  
44  
45 (lack) of prestigious authorships held by women.  
46  
47  
48  
49  
50

### 51 52 **Analysis of data**

53 Average annual growth rates (AAGR) were applied to characterize annual growth rates<sup>14</sup>. The  
54  
55 AAGRs of both, FARs and number of authorships were used to make a linear prognosis of the  
56  
57  
58  
59  
60

1  
2  
3 temporal development of FAP, FAOR and *Prestige Index* for the coming decade. The Pearson  
4  
5 correlation was applied to evaluate the linear association between the FAP, the *Prestige*  
6  
7 *Index* and the journals' mean impact factor. The latter was calculated over the years 2008 to  
8  
9 2016/2017. The null hypothesis, whether the *non-normally* distributed gendered citation  
10  
11 rates (supplementary Fig. 5) stem from the same distribution, was tested by a Kruskal-Wallis-  
12  
13 test and a post-hoc multi-comparison test. The significance threshold was set at .05.  
14  
15  
16  
17  
18  
19  
20  
21  
22  
23  
24  
25  
26  
27  
28  
29  
30  
31  
32  
33  
34  
35  
36  
37  
38  
39  
40  
41  
42  
43  
44  
45  
46  
47  
48  
49  
50  
51  
52  
53  
54  
55  
56  
57  
58  
59  
60



## Results

### Female authorships on a global level

In a first step, we analyzed the representation of female authorships on a global level. The analysis reveals an underrepresentation of female authorships with a FAP of 43.0% (Fig. 1A, bottom), relatively more first-authorships (50.2%), an almost equal proportion of female co-authorships (43.7%) and a substantially less fraction of last-authorships (33.1%). The corresponding FAORs (Fig. 1A) are 1.41 (CI: 1.37-1.45) for first authorships, 1.07 (CI: 1.04-1.10) for co-authorships and 0.60 (CI: 0.58-0.62) for last authorships. The differences are statistically significant ( $P < .05$ ) for all types of authorships between the two genders. Thus, the global FAOR-pattern is characterized by the FAOR-triplet (+, +, -), i.e. women have significant higher odds for first and co-authorships and significant lower odds for last-authorships. The *Prestige Index* is on average -0.11, indicating a minor lack of prestigious authorships held by women (Fig. 1A, bottom).

The FAP exhibits a relatively high increase over the evaluation period (39.5% in 2008, 46.1% in 2017, Fig. 1B) with an AAGR of 1.74%. The subanalysis reveals a disproportionally high annual growth for last authorships (2.97%) and disproportionally low values for co- (1.53%) and first authorships (1.45%). Overall, this led to more gender-neutrality in authorships odds during the recent years, as also indicated by the *Prestige Index* (-0.19 in 2008 and -0.11 in 2017).

### Differences across countries

When we refined our analysis from global to country-specific level, we identified among the most productive countries a wide range of FAPs that extent from 66.7% in Finland to 25.3% in Japan (Table 1). Different FAOR-patterns were identified ranging from *unfavorable* with the FAOR-triplet (=, +, -) identified in Poland, Italy, and Spain to *favorable* with the FAOR-triplet (+, -, =) in Denmark, Finland and the Netherlands (Table 1). Israel provides gender-

1  
2  
3 neutrality with respect to all authorships (FAOR-triplet (=, =, =)). The majority of the  
4  
5 countries exhibit FAOR-patterns that are characterized by lower female odds for last and  
6  
7 higher female odds for first authorships compared to men. Remarkably, there is not a single  
8  
9 country where women have currently higher odds for a last authorship compared to men.  
10

11  
12 When considering the distribution of prestigious authorships, we found countries with very  
13  
14 high *Prestige Indices*, like Denmark (*Prestige Index* = 0.60), Finland (0.54), and the  
15  
16 Netherlands (0.42). In these countries, women have higher odds to hold a prestigious  
17  
18 authorship compared to men. By contrast, Italy (*Prestige Index* = -0.46), Spain (-0.50), Japan  
19  
20 (-0.51) and Austria (-0.58) are characterized by a lack of prestigious authorships held by  
21  
22 women. Remarkably, we found no significant correlation between the FAP of a country and  
23  
24 its *Prestige Index* ( $r(18)=0.36, P>.05$ ).  
25  
26  
27  
28

### 29 **Differences across journals**

30  
31 At the level of individual journals, the FAP ranges from 53.4% in *Sexually Transmitted*  
32  
33 *Diseases* to 32.9% in *Lasers in Surgery and Medicine* (Table 2). The predominant FAOR-  
34  
35 pattern is characterized by the FAOR-triplet (+, =, -). Moreover, in almost all journals (with  
36  
37 the exception of *Contact Dermatitis*) women have significant lower odds for last-  
38  
39 authorships. Furthermore, in our analysis, there is no journal, where a) male scholars have  
40  
41 significantly higher odds for first authorships compared to their female counterparts, and b)  
42  
43 where women have higher odds to secure last authorships than men.  
44  
45  
46

47  
48 The *Prestige Index* value range is from -0.50 to 0.19 (Table 2): Best odds for women to secure  
49  
50 prestigious authorships are given in *Contact Dermatitis* (*Prestige Index* = 0.19) and *Acta*  
51  
52 *Dermato-Venereologica* (0.11), whereas *Dermatology* (-0.5) and *Mycoses* (-0.41) provide  
53  
54 best odds for male scholars. We found no significant correlation between the a) FAP of the  
55  
56  
57  
58  
59  
60

1  
2  
3 journal and its Mean Impact Factor ( $r(21)=0.08$ ,  $P>.05$ ), b) the *Prestige Index* and the Mean  
4  
5 Impact Factor ( $r(21)=0.37$ ,  $P>.05$ ), and c) the FAP and the *Prestige Index* ( $r(21)=0.08$ ,  $P>.05$ ).  
6  
7

### 8 **Female authorships by authors per article**

9 We also assess the role women tend to have in articles with many authors, e.g. collaborative  
10  
11 articles. The FAP fluctuates between 40.9% (1-3 authors/article) and 43.7% (7-9  
12  
13 authors/article) and exhibits no significant correlation to the number of authors per article.  
14  
15 Although the FAORs for first and last authorships have the tendency to slightly increase and  
16  
17 decrease, respectively, with an increasing number of authors, this trend is reversed for  
18  
19 higher author rates (>12 authors/article) (Fig. 2). In addition, the FOAR for co-authorships  
20  
21 shows no significant relationship to the author rate. As a consequence, the *Prestige Index*  
22  
23 fluctuates between -0.02 (13-15 authors/article) and -0.21 (>15 authors/article). To  
24  
25 summarize, FAP, FAORs and *Prestige Index* show no clear correlation to the number of  
26  
27 authors per article.  
28  
29  
30  
31  
32

### 33 **Citation & Productivity Analysis**

34 The analysis reveals that articles with male key authors are more frequently cited than  
35  
36 articles with female authors (Fig. 3A). However, the differences are very low as articles with  
37  
38 a male last or first author have average citation rates of 9.7 citations/article and 9.6  
39  
40 citations/article, respectively and articles with a female first or last author exhibit citation  
41  
42 rates of 9.1 citations/article and 9.0 citations/article, respectively. Statistically significant  
43  
44 differences in the distributions of citation rates were only found between articles with male  
45  
46 last authors and all other article groups (Kruskal-Wallis-Test,  $P<.05$ ). Articles with a female  
47  
48 first or last authorship were on average below the mean citation rate of 9.2 citations/article.  
49  
50  
51

52  
53 The analysis of combined authorships shows that male-first/female-last and male-first/male-  
54  
55 last articles have on average the highest citation rates with 10.1 citations/article and 9.9  
56  
57  
58  
59  
60

1  
2  
3 citations/article, respectively, followed by female-first/male-last (9.5 citations/article) and  
4  
5 female-first/female-last (8.5 citations/article) articles (Figure 3A, right). Single-authored  
6  
7 articles have the lowest citation rates with slightly higher citation rates for male-authored  
8  
9 articles (6.8 citations/article vs. 6.5 citations/articles).

10  
11  
12 The analysis further demonstrates that statistically the citation rate of an article gets higher  
13  
14 the more authors are involved, e.g. articles with 1-3 authors are on average cited 7.8 times,  
15  
16 whereas articles with more than 15 authors are cited 15.9 times on average (Fig. 3B).  
17  
18 Furthermore, the revealed differences in the citation rates between articles with male or  
19  
20 female key authors are not preserved when articles are grouped by the length of their  
21  
22 author list, as shown by Fig. 3B. In this grouping scheme, articles with female last authors  
23  
24 and more than 15 authors attract the highest citation rates of on average 18.6 citations per  
25  
26  
27  
28  
29 article.

30  
31  
32 Considering the gender-specific distribution of the article count per author, we found, that  
33  
34 the subgroups 'author of 1 article' and 'author of 2 articles' are relatively dominated by  
35  
36 women. In particular, 71.5% of the female authors, but only 68.1% of the male authors had  
37  
38 published a single article in our data set (Fig. 3C). By contrast, all other subgroups with three  
39  
40 or more articles per author show a relative overrepresentation of male authors. Particularly,  
41  
42 the subgroup of most productive authors ('author of more than 10 articles') is considerably  
43  
44 dominated by men (2.4% of the male authors vs. 1.2% of the female authors). This finding  
45  
46 results in a slightly higher productivity of male authors, as 53.0% of male authors hold 57.0%  
47  
48  
49  
50 of all authorships (Fig. 3C).

## Discussion

### Advanced integration of women

The field of high-quality dermatological research is characterized by a moderate underrepresentation of female authorships with an FAP of 43.0%. This value is considerably higher than the previously determined FAPs, which were found for the whole area of science (30%)<sup>13</sup>, for six high-quality medical journals (34%)<sup>21</sup>, and for similar studies from the research fields of epilepsy (39.4%)<sup>14</sup>, schizophrenia (37.6%)<sup>12</sup>, stroke research (36.3%, unpublished data), and lung cancer research (31.3%)<sup>22</sup>, see Table 3.

Female scholars are inhomogeneously distributed across the different authorships: We found many female first authorships and a significantly lower proportion of female last authorships. Evidently, this finding illustrates the well-known, gender-specific career dichotomy as first- or co-authorships are usually held by early career researchers, whereas last authorships are regularly preserved for institutional heads or principal investigators<sup>18</sup>. Such a discrepancy in leadership positions has been described for the most scientific disciplines<sup>13</sup>, including various medical research fields<sup>1,12,14,23-26</sup>. What are the reasons for such a striking career dichotomy between the two genders? Differences in career preferences between men and women are one reason that can be cited in this regard<sup>27</sup>. Specifically, it has been shown that men were more likely to occupy investigative career tracks (26.5% vs. 11.1%), whereas women predominantly occupied clinical educator tracks (81.5% vs. 50.0%) in U.S. dermatology<sup>1</sup>. Other reasons include altered life priorities like family planning<sup>13</sup>, the lack of role models<sup>26</sup>, an insufficient work-life balance<sup>26</sup>, women's increased likelihood to occupy part-time positions<sup>1</sup>, and the consistently high influx of female medical students and graduates<sup>26</sup>.

1  
2  
3 Interestingly, low female odds for last-authorships are numerically compensated by high  
4 female odds for first-authorships. This constellation leads to an almost gender neutral  
5 distribution of prestigious authorships on the global level. This finding is important, since  
6 academic publishing at prestigious authorships is one of the core elements of career  
7 advancement in science<sup>12,28-30</sup>. However, the underrepresentation of last authorships  
8 potentially reduces the further career advancement of the female scientists<sup>31</sup>, since last  
9 authorships are often taken as a major indicator of successful leadership, e.g. by committees  
10 making this a criterion in granting and hiring<sup>18</sup>. In line with this, a cross-sectional survey from  
11 2009 revealed a clear gender difference in academic *senior* ranks of U.S. dermatologists, as it  
12 was reported that "women were predominantly at the assistant professor level (50.0%)  
13 compared with men (24.3%), whereas men were predominantly at the full professor level  
14 (47.4%) compared with women (14.9%)"<sup>1</sup>. Evidently, in dermatology, the proportion of  
15 female faculty members declined as academic rank increased.  
16  
17  
18  
19  
20  
21  
22  
23  
24  
25  
26  
27  
28  
29  
30  
31

### 32 33 **Stable representation of women in multi-author articles results in almost** 34 **gender-neutral citation rates** 35

36 Remarkably, we found no significant relationship between the representation of female  
37 authorships and the number of authors per article. Specifically, the representation of female  
38 authorships remains also stable for articles with high numbers of authors (e.g. collaboration  
39 articles), which statistically attract the highest citation rates (Fig. 3B)<sup>32</sup>. This is an important  
40 result, since it provides a good explanation for the almost equal citation rates of articles that  
41 were grouped by the gender of their key authors. This is particularly remarkable, since for  
42 all other disciplines we have examined so far, we find a) an accentuating  
43 underrepresentation of women at prestigious authorships with an increasing number of  
44 authors per article and b) significantly higher citation rates of articles with male key authors.  
45  
46  
47  
48  
49  
50  
51  
52  
53  
54  
55  
56  
57 Moreover, previous studies from various disciplines also reported about substantially higher  
58  
59  
60

1  
2  
3 citation rates for articles with male key authors<sup>13,29,31,33-35</sup>. To summarize, well-balanced  
4  
5 citation rates between the two genders suggest that the integration of women in  
6  
7 dermatological science is well-advanced. Methodically, it is important to note that the  
8  
9 determined citation rates describe essentially the situation from the early phase of  
10  
11 investigation (2008-2010), since older articles have a stronger impact on the citation  
12  
13 statistics than newer articles ("Cited Half-Life")<sup>36</sup>.

### 17 **Structural position affects productivity**

18 The lower productivity of female scholars (47% female authors hold 43% of the authorships)  
19  
20 is in line with reports from other scientific fields and medical disciplines<sup>12-14,23-25,37</sup>.  
21  
22 Interestingly, we were able to reproduce the clear male overrepresentation at levels of  
23  
24 higher productivity (Fig. 3C), as already shown for the fields of ecology and evolutionary  
25  
26 biology<sup>34</sup>, the medical research fields of schizophrenia<sup>12</sup> and epilepsy<sup>14</sup>, and for the field of  
27  
28 high-quality research from the areas life science, earth & environmental, multidisciplinary  
29  
30 and chemistry<sup>35</sup>. It is reasonable to assume that the primary factors affecting women's  
31  
32 productivity are not higher rejection rates as explicitly shown for the journals *Cortex*<sup>38</sup> and  
33  
34 *Nature Neuroscience*<sup>39</sup>, but rather, due to the position of women within the scientific  
35  
36 system<sup>28,35</sup>. In practice, the mainly male senior scientists are often associated to more or less  
37  
38 fruitful (citation) networks, whereas "women are more likely to work as adjuncts or at  
39  
40 teaching-intensive institutions with limited resources"<sup>28</sup>. This assumption is confirmed by a  
41  
42 previous study from Sadeghpour et al.<sup>1</sup> documenting no differences in the number of  
43  
44 publications of full-time academic dermatologists after adjustment for academic rank.  
45  
46 Moreover, it has been shown by Reed et al.<sup>37</sup> that women's publication rates start to  
47  
48 increase later in their career.  
49  
50  
51  
52  
53  
54  
55  
56  
57  
58  
59  
60

### Distinct regional differences

1  
2  
3  
4 Apart from these global findings, distinct regional differences were found with best-balanced  
5  
6 authorship odds between the two genders in Israel (FAOR-triplet (=, =, =), *Prestige Index* = -  
7  
8 0.01). When taking the chance of holding a prestigious authorship as a general surrogate  
9  
10 parameter for career advancement in science <sup>14</sup>, Denmark, Finland, and the Netherlands  
11  
12 provide the best conditions for female authors. By contrast, Italy, Spain, Japan, and Austria  
13  
14 offer optimal conditions for men in dermatological research. This finding correlates quite  
15  
16 well with the results of the Global Gender Gap Report 2016 as the countries Finland, the  
17  
18 Netherlands and Denmark were ranked 2<sup>nd</sup>, 16<sup>th</sup>, and 19<sup>th</sup>, respectively, whereas the  
19  
20 countries Spain, Italy, Austria, and Japan were ranked 29<sup>th</sup>, 50<sup>th</sup>, 52<sup>nd</sup> and 111<sup>th</sup>, respectively,  
21  
22 out of a total of 144 countries in the world <sup>40</sup>. It is plausible to assume that these regional  
23  
24 differences are not caused by discipline-specific characteristics, but rather, are primarily due  
25  
26 to socio-cultural surroundings, as, for example, Japan is characterized by a strong sense of  
27  
28 patriarchy and traditional gender roles in society <sup>41</sup>. This is all the more relevant, since similar  
29  
30 constellations were found in most of our studies <sup>12,14</sup>. Overall, the given information supplies  
31  
32 women operating in the field of dermatology with a solid basis for decision-making for  
33  
34 professional reorientation or career planning.  
35  
36  
37  
38  
39  
40

41  
42 As in all our previous studies, we did not find a significant correlation between the FAP of a  
43  
44 country and the distribution of prestigious authorships between the two genders <sup>12</sup>. This  
45  
46 means, countries with a high FAP can also provide disadvantageous career opportunities for  
47  
48 women and vice versa. A valuable example is Italy with a high rate of FAP (54.2%) and a  
49  
50 negative *Prestige Index* (-0.46). Interestingly, this finding is contrary to the socio-cultural  
51  
52 theory of the critical mass <sup>42</sup>, postulating a self-sustained harmonization of gender aspects  
53  
54  
55  
56  
57  
58  
59  
60



1  
2  
3 once the participation of women has exceeded a critical threshold value of about 30% to  
4  
5 35%.  
6  
7

### 8 **Journals with a high degree of uniformity**

9 At the level of individual journals, we reveal a striking uniformity of gender-specific  
10  
11 authorship odds, as in 19 out of 23 journals women have significantly higher odds for first  
12  
13 authorships and lower odds for last authorships. Evidently, the global gender-specific  
14  
15 hierarchy of research groups is mapped to the related journals. This finding explains also the  
16  
17 relatively small value range of the journals' Prestige Index compared to that of other  
18  
19 countries ( $\Delta$ Prestige Index: 0.69 vs. 1.18). Remarkably, we do not find a significant  
20  
21 correlation between the impact of a journal (characterized by the SJRI) and the revealed  
22  
23 Prestige Index measuring the distribution of prestigious authorships between the two  
24  
25 genders. Interestingly, this finding is contrary to our recent study analyzing the female  
26  
27 authorship odds in fifty-four of *highest-quality* research journals listed in the Nature Index,  
28  
29 which covers the journal categories *Life Science, Multidisciplinary, Earth & Environmental*  
30  
31 and *Chemistry*. In this study a clear negative correlation between the 5-year-impact factor of  
32  
33 a journal and its Prestige Index ( $r(52)=-0.63, P<.01$ ) was revealed<sup>35</sup>. In contrast to academic  
34  
35 dermatology, in this cross-discipline group of highest-impact journals, the female  
36  
37 underrepresentation is accentuated in highly competitive articles attracting the highest  
38  
39 citation rates, namely, articles with many authors and articles that were published in  
40  
41 highest-impact journals (Table 3). To conclude, uniformity of authorship odds as well as  
42  
43 stable representation of women regardless of the journal impact speak for an advanced  
44  
45 integration of women and against the predominance of "old boys' networks" in the field of  
46  
47 high-quality dermatology research and its related journals<sup>14</sup>.  
48  
49  
50  
51  
52  
53  
54  
55  
56  
57  
58  
59  
60

## Methodical Limitations

Methodically, our purely bibliometric and algorithmic approach enables us to analyze large volumes of data standardized and independent of the examiner, and thus with a minimized interindividual variability. However, as already mentioned in Bendels et al.<sup>14</sup>, it is limited by the absence of information concerning equally distributed authorships, corresponding authors, as well as data providing information about the scholar's academic degree, their position (e.g. Associate Professor vs. Full Professor)<sup>1</sup>, age, employment status and their participation on editorial boards<sup>26,43</sup>. Furthermore, the investigation period is technically limited to articles that are published after 2006 due to the predominance of first names initials preventing a correct gender identification in older articles<sup>20</sup>. Another limitation of the gender determination by first names is the fact that we had to exclude some countries from the *country-specific* analysis due to a relative high fraction of unisex names (primarily the Asian countries China and South Korea participating at 5% and 4%, respectively, of the articles).

## Conclusion & Outlook

In conclusion, a) the relatively high FAP, b) the almost gender-neutral citation rates, and c) the stable representation of female scholars in both articles with many authors as well as highest impact journals can be considered indicators for an advanced integration of women in high-quality dermatological research compared to other (medical) disciplines (Table 3). However, a considerable career dichotomy is still present, with many female researchers at the beginning of their career and few women in academic leadership positions. Since there is a clear time-dependence present in authorship hierarchy - current early career researchers may be future research leaders – it is plausible to prognosticate a considerable increase of women in academic leadership positions in the next decade. This trend will likely be intense due to the high annual increase of female authorships (1.74%) with the highest rates for the

1  
2  
3 last author position (2.97%), and the trend of more and more female physicians entering the  
4  
5 field of medicine in many Western countries<sup>2,44</sup>. In line with this perspective, a linear  
6  
7 prognosis of the temporal development of female authorships prognosticates not only an  
8  
9 FAP of 54.3% for the year 2026, but also increasing female odds for last authorships and  
10  
11 decreasing female odds for co-authorships (Fig. 4). This harmonization in authorship odds  
12  
13 results in a Prestige Index that is forecast to become almost gender-neutral in 2026 (*Prestige*  
14  
15 *Index* = -0.03). On this basis, we expect a deeper integration of female scientists with a  
16  
17 growing number of women in academic leadership positions in the next decade. However, it  
18  
19 should be critically mentioned that, contrary to this prediction, various studies recently  
20  
21 report about a striking persistence of gender inequalities regarding academic leadership  
22  
23 positions despite a considerable increase in female first authorships<sup>24-26,45</sup>.  
24  
25  
26  
27

28  
29 In view of this, the present analysis may define a starting point: Continuous monitoring over  
30  
31 the next years will elucidate if female career dichotomy will break down, leading to a more  
32  
33 balanced distribution of research leaders between both genders in dermatological research.  
34  
35  
36  
37  
38  
39  
40  
41  
42  
43

#### 44 **CONTRIBUTORSHIP STATEMENT**

45 MB, NS and DG designed the study. MB and MD collected and performed the analysis. MB,  
46  
47 MD, DB, GO, NS and DAG interpreted the result. MB wrote the first draft of manuscript. MB,  
48  
49 MD, DB, GO, NS and DG contributed to and have approved the final manuscript.  
50  
51  
52  
53  
54  
55  
56  
57  
58  
59  
60

## DATA SHARING STATEMENT

No additional data available.

## COMPLIANCE WITH ETHICAL STANDARDS

**Conflict of Interest:** The authors declare that they have no conflict of interest.

**Funding:** This research received no specific grant from any funding agency in the public, commercial or not-for-profit sectors.

**Ethical approval:** This article does not contain any studies with human participants or animals performed by any of the authors.

## Tables

**Table 1: Country Classification.** Countries are descendingly ordered by their *Prestige Index*.

The number of considered male and female authorships is given by #Authorships.

| Country Name   | Female Authorship Ratio | FAOR-triplet | <i>Prestige Index</i> | #Articles | #Authorships |
|----------------|-------------------------|--------------|-----------------------|-----------|--------------|
| Denmark        | 43.4%                   | (+, -, =)    | 0.60                  | 637       | 2,392        |
| Finland        | 66.7%                   | (+, -, =)    | 0.54                  | 177       | 787          |
| Netherlands    | 44.8%                   | (+, -, =)    | 0.42                  | 941       | 3,400        |
| Brazil         | 56.1%                   | (+, -, -)    | 0.14                  | 959       | 4,141        |
| Turkey         | 45.2%                   | (+, =, =)    | 0.08                  | 518       | 1,930        |
| Sweden         | 53.7%                   | (+, =, -)    | 0.07                  | 630       | 2,118        |
| Israel         | 38.3%                   | (=, =, =)    | -0.01                 | 331       | 1,032        |
| Canada         | 42.1%                   | (+, =, -)    | -0.04                 | 816       | 2,160        |
| Germany        | 37.6%                   | (+, =, -)    | -0.09                 | 2,498     | 10,438       |
| Australia      | 42.6%                   | (+, =, -)    | -0.10                 | 817       | 3,016        |
| United States  | 42.9%                   | (+, +, -)    | -0.14                 | 8,391     | 33,510       |
| Belgium        | 51.2%                   | (+, =, -)    | -0.16                 | 378       | 1,001        |
| France         | 48.9%                   | (+, =, -)    | -0.17                 | 1,171     | 5,566        |
| United Kingdom | 45.8%                   | (+, +, -)    | -0.18                 | 1,751     | 4,825        |
| Switzerland    | 34.3%                   | (+, =, -)    | -0.26                 | 560       | 1,659        |
| Poland         | 54.2%                   | (=, +, -)    | -0.39                 | 257       | 967          |
| Italy          | 54.2%                   | (=, +, -)    | -0.46                 | 1,269     | 6,455        |
| Spain          | 48.8%                   | (=, +, -)    | -0.50                 | 711       | 3,073        |
| Japan          | 25.3%                   | (+, +, -)    | -0.51                 | 1,564     | 8,126        |
| Austria        | 38.6%                   | (+, +, -)    | -0.58                 | 475       | 1,760        |

**Table 2: Journal Classification.** Journals are descendingly ordered by their *Prestige Index*.

| Journal Name                                   | Mean Impact Factor 2008-2016 | Female Authorship Ratio | FAOR-triplet | Prestige Index | #Articles | #Authorships |
|------------------------------------------------|------------------------------|-------------------------|--------------|----------------|-----------|--------------|
| Contact Dermatitis                             | 3.85                         | 49.5%                   | (+, -, =)    | 0.19           | 721       | 3,623        |
| Acta Dermato-Venereologica                     | 3.27                         | 47.4%                   | (+, =, -)    | 0.11           | 834       | 4,749        |
| Sexually Transmitted Infections                | 2.88                         | 50.1%                   | (+, =, -)    | 0.06           | 1,110     | 4,369        |
| Wound Repair and Regeneration                  | 2.80                         | 38.1%                   | (+, =, -)    | 0.03           | 847       | 4,354        |
| Journal of Dermatological Science              | 3.54                         | 33.4%                   | (+, =, -)    | 0.03           | 727       | 3,763        |
| Journal of the American Academy of Dermatology | 4.83                         | 44.9%                   | (+, =, -)    | -0.01          | 2,103     | 11,338       |
| Sexually Transmitted Diseases                  | 2.78                         | 53.4%                   | (+, =, -)    | -0.05          | 1,370     | 7,500        |
| Journal of Investigative Dermatology           | 6.26                         | 42.1%                   | (+, =, -)    | -0.06          | 2,392     | 16,865       |
| Lasers in Medical Science                      | 2.29                         | 40.1%                   | (+, =, -)    | -0.1           | 1,550     | 6,130        |
| American Journal of Clinical Dermatology       | 2.16                         | 47.5%                   | (+, =, -)    | -0.13          | 263       | 981          |
| Melanoma Research                              | 2.29                         | 44.6%                   | (+, =, -)    | -0.14          | 616       | 3,845        |
| Dermatologic Surgery                           | 2.04                         | 35.9%                   | (+, =, -)    | -0.16          | 1,715     | 6,473        |
| Archives of Dermatological Research            | 2.19                         | 41.6%                   | (+, =, -)    | -0.16          | 799       | 3,355        |
| Lasers in Surgery and Medicine                 | 2.67                         | 32.9%                   | (+, =, -)    | -0.17          | 938       | 4,161        |
| Pigment Cell & Melanoma Research               | 4.91                         | 42.9%                   | (+, =, -)    | -0.18          | 510       | 3,199        |
| Experimental Dermatology                       | 3.45                         | 41.9%                   | (+, +, -)    | -0.19          | 1,644     | 8,732        |
| International Wound Journal                    | 1.99                         | 37.1%                   | (=, +, -)    | -0.21          | 891       | 3,877        |
| JAMA Dermatology                               | 5.46                         | 47.2%                   | (+, +, -)    | -0.27          | 491       | 3,163        |
| Journal of Dermatological Treatment            | 1.65                         | 45.1%                   | (+, +, -)    | -0.3           | 655       | 2,590        |
| Dermatologic Clinics                           | 1.74                         | 47.3%                   | (+, +, -)    | -0.35          | 569       | 1,205        |
| Clinics In Dermatology                         | 2.40                         | 43.6%                   | (=, +, -)    | -0.39          | 743       | 1,732        |
| Mycoses                                        | 1.81                         | 47.0%                   | (=, +, -)    | -0.41          | 974       | 3,710        |
| Dermatology                                    | 2.06                         | 41.7%                   | (+, +, -)    | -0.5           | 911       | 3,475        |

**Table 3: Synopsis of different subject areas.** In high-quality dermatological research, the integration of female scholars is advanced as compared to other (medical) disciplines. However, in all subject areas, a considerable career dichotomy is still present, with many female researchers at the beginning of their career and few women in academic leadership positions. Please note that the *Nature Index* offers a database for the specific analysis of high impact scientific efforts from the journal categories of multidisciplinary, earth & environmental, life science and physics<sup>46</sup> (physics was excluded from analysis).

| Subject Area                        | FAP   | FAOR First | FAOR Co | FAOR Last | Prestige Index | Female representation at prestigious authorships in |                         | Gender-specific differences in citation rates |
|-------------------------------------|-------|------------|---------|-----------|----------------|-----------------------------------------------------|-------------------------|-----------------------------------------------|
|                                     |       |            |         |           |                | multi-author articles                               | highest impact journals |                                               |
| Q1 Dermatology                      | 43.0% | 1.41       | 1.07    | 0.60      | -0.11          | Stable                                              | Stable                  | minor                                         |
| Epilepsy <sup>14</sup>              | 39.6% | 1.25       | 1.17    | 0.57      | -0.22          | Decline                                             | -                       | major                                         |
| Schizophrenia <sup>12</sup>         | 37.6% | 1.30       | 1.20    | 0.57      | -0.22          | Sharp Decline                                       | -                       | major                                         |
| Lung Cancer <sup>22</sup>           | 31.3% | 1.22       | 1.19    | 0.59      | -0.22          | Sharp Decline                                       | -                       | minor                                         |
| Nature Index Journals <sup>35</sup> | 29.8% | 1.19       | 1.35    | 0.47      | -0.42          | Sharp Decline                                       | Decline                 | major                                         |

## References

1. Sadeghpour M, Bernstein I, Ko C, Jacobe H. Role of sex in academic dermatology: results from a national survey. *Archives of dermatology*. 2012;148(7):809-814.
2. Lautenberger DM, Dandar VM, Raezer CL, Sloane RA. The State of Women in Academic Medicine: The Pipeline and Pathways to Leadership, 2013-2014. 2014; <https://www.aamc.org/members/gwims/statistics/>. Accessed 2016-10-11, 2016.
3. Brooke B. Number of Female Medical School Enrollees Reaches 10-Year High. <https://news.aamc.org/press-releases/article/applicant-enrollment-2016/> 2016. Accessed November 01, 2016
4. Kimball AB. Sex, academics, and dermatology leadership: progress made, but no more excuses. *Archives of dermatology*. 2012;148(7):844-846.
5. Pincus S. Women in academic dermatology. Results of survey from the professors of dermatology. *Archives of dermatology*. 1994;130(9):1131-1135.
6. Jacobson CC, Resneck JS, Jr., Kimball AB. Generational differences in practice patterns of dermatologists in the United States: implications for workforce planning. *Archives of dermatology*. 2004;140(12):1477-1482.
7. Resneck JS, Jr., Tierney EP, Kimball AB. Challenges facing academic dermatology: survey data on the faculty workforce. *Journal of the American Academy of Dermatology*. 2006;54(2):211-216.
8. Turner E, Yoo J, Salter S, Kimball AB. Leadership workforce in academic dermatology. *Archives of dermatology*. 2007;143(7):948-949.
9. Jacobson CC, Nguyen JC, Kimball AB. Gender and parenting significantly affect work hours of recent dermatology program graduates. *Archives of dermatology*. 2004;140(2):191-196.
10. Shi CR, Olbright S, Vleugels RA, Nambudiri VE. Sex and leadership in academic dermatology: A nationwide survey. *Journal of the American Academy of Dermatology*. 2017;77(4):782-784.
11. Gollins CE, Shipman AR, Murrell DF. A study of the number of female editors-in-chief of dermatology journals. *International journal of women's dermatology*. 2017;3(4):185-188.
12. Bendels MHK, Bauer J, Schoffel N, Groneberg DA. The gender gap in schizophrenia research. *Schizophrenia research*. 2017.
13. Lariviere V, Ni C, Gingras Y, Cronin B, Sugimoto CR. Bibliometrics: global gender disparities in science. *Nature*. 2013;504(7479):211-213.
14. Bendels MHK, Wanke E, Schöffel N, Bauer J, Quarcoo D, Groneberg D. Gender equality in academic research on epilepsy - a study on scientific authorships. *Epilepsia*. 2017.
15. Jagsi R, Guancial EA, Worobey CC, et al. The "gender gap" in authorship of academic medical literature--a 35-year perspective. *The New England journal of medicine*. 2006;355(3):281-287.
16. Marusic A, Bosnjak L, Jeroncic A. A systematic review of research on the meaning, ethics and practices of authorship across scholarly disciplines. *PloS one*. 2011;6(9):e23477.
17. Murphy TF. Authorship and Publication. In: McGee G. *Case Studies in Biomedical Research Ethics*. 1. edition ed: The MIT Press; 2004.
18. Tschardt T, Hochberg ME, Rand TA, Resh VH, Krauss J. Author sequence and credit for contributions in multiauthored publications. *PLoS Biol*. 2007;5(1):e18.



19. Fadeel B. "But many that are first shall be last; and the last shall be first". *FASEB journal : official publication of the Federation of American Societies for Experimental Biology*. 2009;23(5):1283.
20. Bendels MHK, Brüggmann D, Schöffel N, Groneberg DA. Gendermetrics.NET: a novel software for analyzing the gender representation in scientific authoring. *J Occup Med Toxicol*. 2016;11:43.
21. Filardo G, da Graca B, Sass DM, Pollock BD, Smith EB, Martinez MA. Trends and comparison of female first authorship in high impact medical journals: observational study (1994-2014). *BMJ*. 2016;352:i847.
22. Bendels MHK, Brüggmann D, Schöffel N, Groneberg DA. Gendermetrics of cancer research: results from a global analysis on lung cancer. *Oncotarget*. 2017;8(60):101911-101921.
23. West M, Curtis J. AAUP faculty gender equity indicators 2006. 2006; <https://www.aaup.org/NR/rdonlyres/63396944-44BE-4ABA-9815-5792D93856F1/0/AAUPGenderEquityIndicators2006.pdf>. Accessed 2006.
24. Long MT, Leszczynski A, Thompson KD, Wasan SK, Calderwood AH. Female authorship in major academic gastroenterology journals: a look over 20 years. *Gastrointestinal endoscopy*. 2015;81(6):1440-1447.e1443.
25. Liang T, Zhang C, Khara RM, Harris AC. Assessing the Gap in Female Authorship in Radiology: Trends Over the Past Two Decades. *Journal of the American College of Radiology : JACR*. 2015;12(7):735-741.
26. Amering M, Schrank B, Sibitz I. The gender gap in high-impact psychiatry journals. *Academic medicine : journal of the Association of American Medical Colleges*. 2011;86(8):946-952.
27. Bickel J, Ruffin A. Gender-associated differences in matriculating and graduating medical students. *Academic medicine : journal of the Association of American Medical Colleges*. 1995;70(6):552-559.
28. Ramsden P. Describing and explaining research productivity. *Higher Education*. 1994;28(2):207-226.
29. Cikara M, Rudman L, Fiske S. Dearth by a Thousand Cuts? Accounting for Gender Differences in Top-Ranked Publication Rates in Social Psychology. *The Journal of social issues*. 2012;68(2):263-285.
30. van den Besselaar P, Sandstrom U. Gender differences in research performance and its impact on careers: a longitudinal case study. *Scientometrics*. 2016;106:143-162.
31. West JD, Jacquet J, King MM, Correll SJ, Bergstrom CT. The role of gender in scholarly authorship. *PloS one*. 2013;8(7):e66212.
32. Figg WD, Dunn L, Liewehr DJ, et al. Scientific collaboration results in higher citation rates of published articles. *Pharmacotherapy*. 2006;26(6):759-767.
33. Schisterman EF, Swanson CW, Lu YL, Mumford SL. The changing face of epidemiology: gender disparities in citations? *Epidemiology (Cambridge, Mass.)*. 2016;28(2):159-168.
34. Symonds MR, Gemmell NJ, Braisher TL, Gorringer KL, Elgar MA. Gender differences in publication output: towards an unbiased metric of research performance. *PloS one*. 2006;1:e127.
35. Bendels MHK, Muller R, Brüggmann D, Groneberg DA. Gender disparities in high-quality research revealed by Nature Index journals. *PloS one*. 2018;13(1):e0189136.
36. Garfield E. The evolution of the Science Citation Index. *International microbiology : the official journal of the Spanish Society for Microbiology*. 2007;10(1):65-69.

- 1  
2  
3  
4  
5  
6  
7  
8  
9  
10  
11  
12  
13  
14  
15  
16  
17  
18  
19  
20  
21  
22  
23  
24  
25  
26  
27  
28  
29  
30  
31  
32  
33  
34  
35  
36  
37  
38  
39  
40  
41  
42  
43  
44  
45  
46  
47  
48  
49  
50  
51  
52  
53  
54  
55  
56  
57  
58  
59  
60
37. Reed DA, Enders F, Lindor R, McClees M, Lindor KD. Gender differences in academic productivity and leadership appointments of physicians throughout academic careers. *Academic medicine : journal of the Association of American Medical Colleges*. 2011;86(1):43-47.
  38. Brooks J, Della Sala S. Re-addressing gender bias in Cortex publications. *Cortex; a journal devoted to the study of the nervous system and behavior*. 2009;45(10):1126-1137.
  39. Neuroscience N. Women in neuroscience: a numbers game. *Nature neuroscience*. 2006;9(7):853.
  40. Leopold TA. The Global Gender Gap Report 2016. World Economic Forum. 2016.
  41. Iwao S. The Japanese woman : traditional image and changing reality / Sumiko Iwao. New York : Toronto : New York: Free Press ; Maxwell Macmillan Canada ; Maxwell Macmillan International; 1993.
  42. Childs S, Mona LK. Critical Mass Theory and Women's Political Representation. *Political Studies*. 2008;56(3):725-736.
  43. Mueller CM, Gaudilliere DK, Kin C, Menorca R, Girod S. Gender disparities in scholarly productivity of US academic surgeons. *Journal of Surgical Research*. 2016;203(1):28-33.
  44. Council GM. The state of medical education and practice in the UK: 2013. 2013.
  45. Kaufman RR, Chevan J. The gender gap in peer-reviewed publications by physical therapy faculty members: a productivity puzzle. *Physical therapy*. 2011;91(1):122-131.
  46. Introducing the Index. *Nature*. 2014;515(7526):S52-53.

## Figure Legends

**Fig 1: Time trend of female authorships on the global level. (A)** The relative frequency of female authorships (FAP, bottom), the pattern of FAORs (with FAOR-triplet, top) and its associated Prestige Index (PI) are depicted by year and averaged over time. The averaged FAOR distribution is characterized by the FAOR-pattern (+, +, -), i.e. women have significantly higher odds for first and co-authorships and significantly lower odds for last-authorships. The slightly negative PI indicates a lack of prestigious authorships held by women. **(B)** The FAP exhibits a relatively high increase as documented by its average annual growth rate (AAGR) of 1.74% per year with the highest rate for last authorships (2.97%). Overall, this led to more gender-neutrality in authorships odds during the recent years.

1  
2  
3 **Fig 2: Female authorships by authors per article.** Although the FAORs for first and last  
4 authorships have the tendency to slightly increase and decrease, respectively, with an  
5 increasing number of authors, this trend is reversed for higher author rates (>12  
6 authors/article). FAP, FAORs and Prestige Index show no clear correlation to the number of  
7 authors per article.  
8  
9  
10  
11  
12  
13  
14  
15  
16  
17  
18  
19  
20  
21  
22  
23  
24  
25  
26  
27  
28  
29  
30  
31  
32  
33  
34  
35  
36  
37  
38  
39  
40  
41  
42  
43  
44  
45  
46  
47  
48  
49  
50  
51  
52  
53  
54  
55  
56  
57  
58  
59  
60

1  
2  
3 **Fig 3: Gender-specificity of citations & scholarly productivity.** (A) The descendingly ordered  
4 citation rates show that articles with male key authorships are slightly more frequently cited  
5 than articles with female key authorships. The mean citation rate of 9.2 citations/article is  
6 depicted by a dotted line (Kruskal-Wallis test, (\*):  $P < .05$  (\*\*):  $P < .01$ ). (B) Average citation  
7 rates of ungrouped articles (bars) and articles that were grouped by the gender of their key  
8 authorships (lines), depicted as a function of the number of authors. Statistically, the citation  
9 rate of an article is higher the more authors are involved. The gender-specific differences in  
10 citation rates are not preserved across the different levels of author count. (C) Gender-  
11 specific distribution of the article count per author. Women dominate the sub-groups  
12 'author has one or two article(s)'. All other sub-groups are characterized by a relatively over-  
13 representation of male authors. This finding correlates with the higher productivity of male  
14 authors, as 52.8% male authors are responsible for 57.0% of all authorships.  
15  
16  
17  
18  
19  
20  
21  
22  
23  
24  
25  
26  
27  
28  
29  
30  
31  
32  
33  
34  
35  
36  
37  
38  
39  
40  
41  
42  
43  
44  
45  
46  
47  
48  
49  
50  
51  
52  
53  
54  
55  
56  
57  
58  
59  
60

1  
2  
3 **Fig 4: Linear projection of the development of female authorships on the global level.** The  
4  
5 prognosis for the next decades forecasts a further harmonization of authorship odds  
6  
7 between the two genders with an almost gender-neutral distribution of prestigious  
8  
9 authorships in 2026 (*Prestige Index* = -0.03). An FAP of 54.3% is prognosticated for the year  
10  
11  
12 2026.  
13  
14  
15  
16  
17  
18  
19  
20  
21  
22  
23  
24  
25  
26  
27  
28  
29  
30  
31  
32  
33  
34  
35  
36  
37  
38  
39  
40  
41  
42  
43  
44  
45  
46  
47  
48  
49  
50  
51  
52  
53  
54  
55  
56  
57  
58  
59  
60

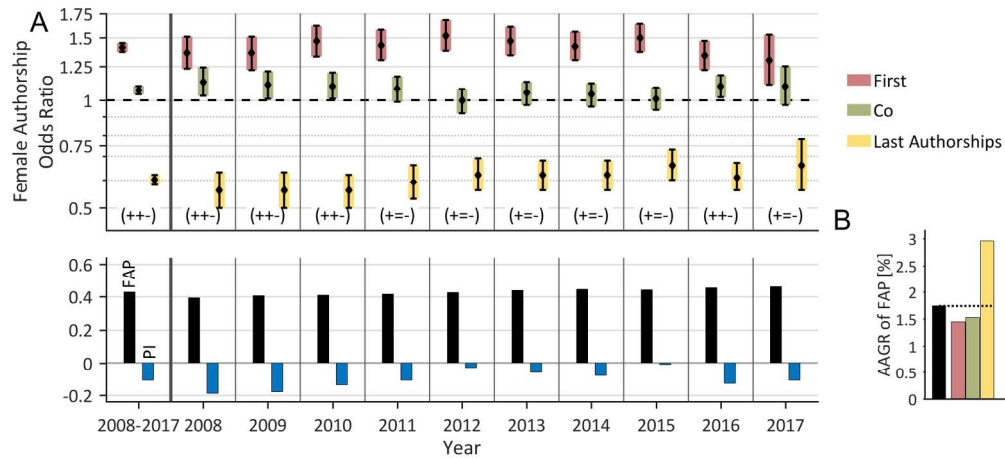

Fig 1: Time trend of female authorships on the global level. (A) The relative frequency of female authorships (FAP, bottom), the pattern of FAORs (with FAOR-triplet, top) and its associated Prestige Index (PI) are depicted by year and averaged over time. The averaged FAOR distribution is characterized by the FAOR-pattern (+, +, -), i.e. women have significantly higher odds for first and co-authorships and significantly lower odds for last-authorships. The slightly negative PI indicates a lack of prestigious authorships held by women. (B) The FAP exhibits a relatively high increase as documented by its average annual growth rate (AAGR) of 1.74% per year with the highest rate for last authorships (2.97%). Overall, this led to more gender-neutrality in authorships odds during the recent years.

160x74mm (300 x 300 DPI)

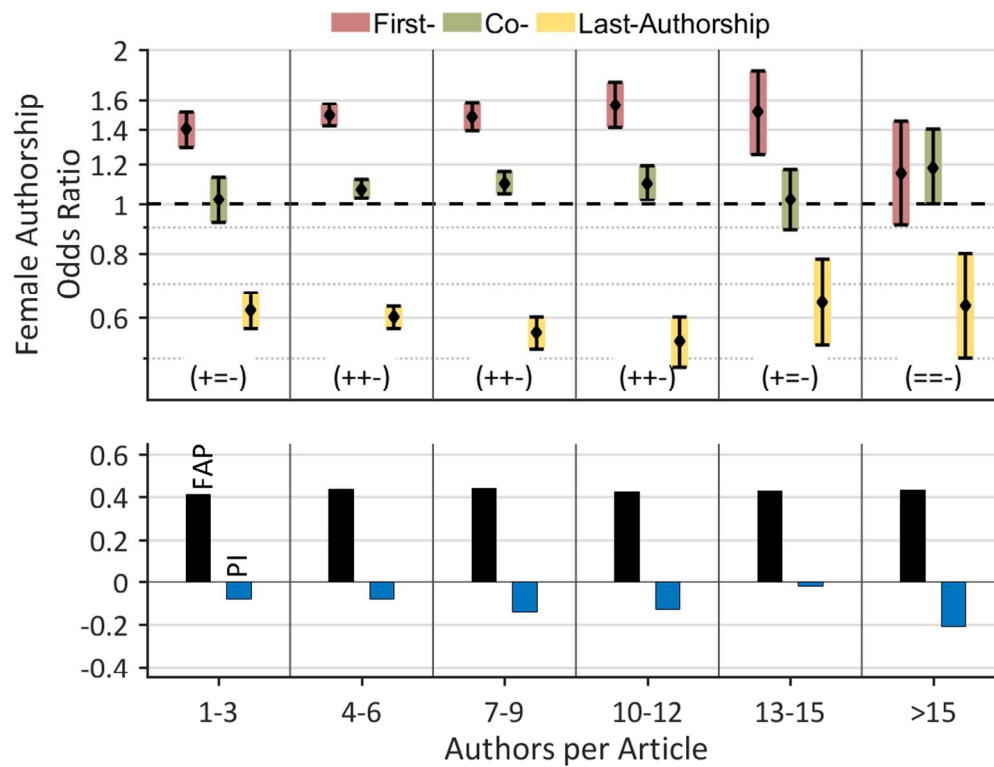

Fig 2: Female authorships by authors per article. Although the FAORs for first and last authorships have the tendency to slightly increase and decrease, respectively, with an increasing number of authors, this trend is reversed for higher author rates (>12 authors/article). FAP, FAORs and Prestige Index show no clear correlation to the number of authors per article.

98x74mm (300 x 300 DPI)



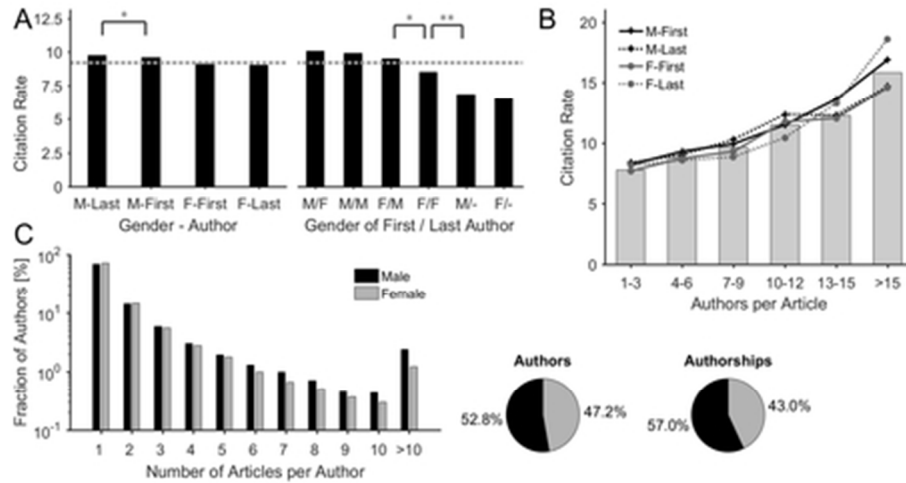

Fig 3: Gender-specificity of citations & scholarly productivity. (A) The descendingly ordered citation rates show that articles with male key authorships are slightly more frequently cited than articles with female key authorships. The mean citation rate of 9.2 citations/article is depicted by a dotted line (Kruskal-Wallis test, (\*):  $P < .05$  (\*\*):  $P < .01$ ). (B) Average citation rates of ungrouped articles (bars) and articles that were grouped by the gender of their key authorships (lines), depicted as a function of the number of authors. Statistically, the citation rate of an article is higher the more authors are involved. The gender-specific differences in citation rates are not preserved across the different levels of author count. (C) Gender-specific distribution of the article count per author. Women dominate the sub-groups 'author has one or two article(s)'. All other sub-groups are characterized by a relatively over-representation of male authors. This finding correlates with the higher productivity of male authors, as 52.8% male authors are responsible for 57.0% of all authorships.

38x20mm (300 x 300 DPI)

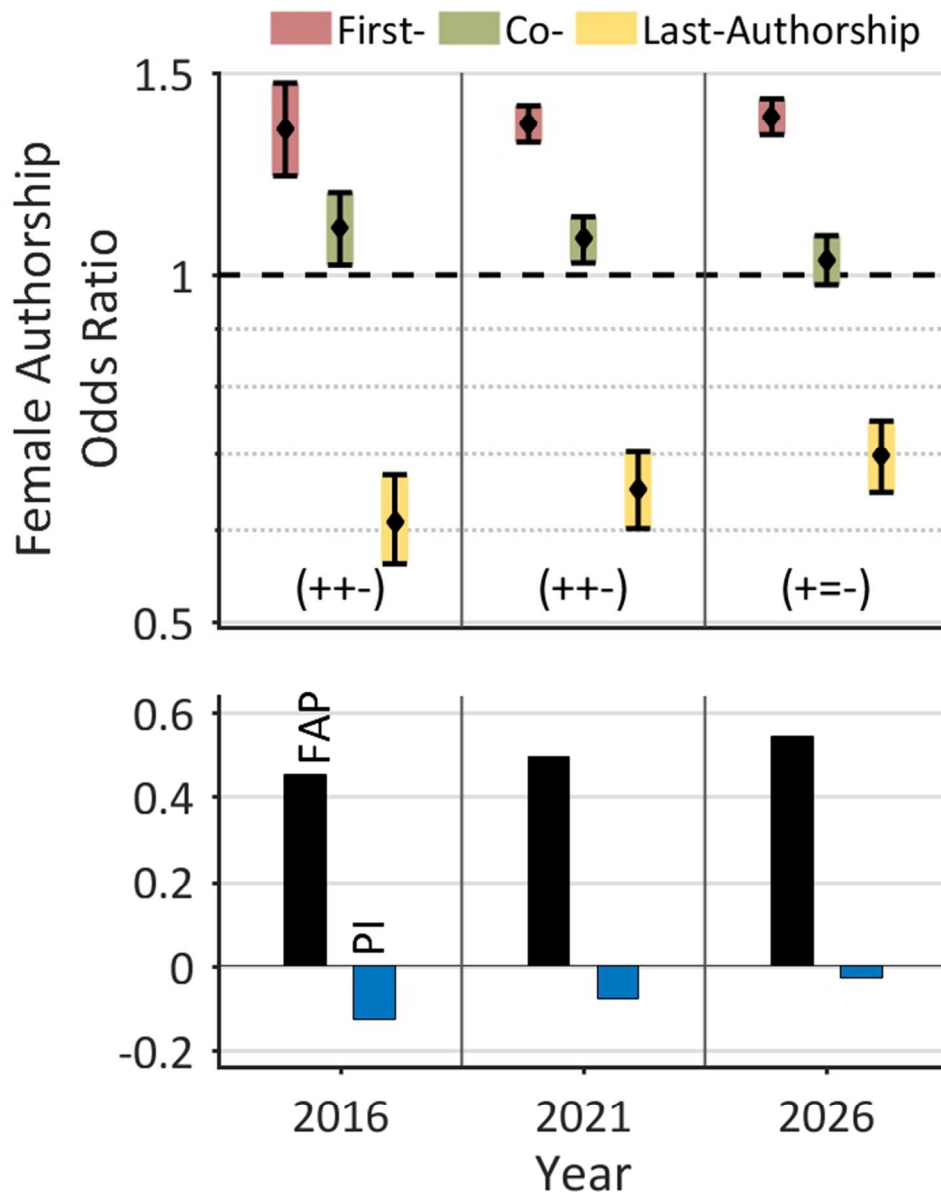

Fig 4: Linear projection of the development of female authorships on the global level. The prognosis for the next decades forecasts a further harmonization of authorship odds between the two genders with an almost gender-neutral distribution of prestigious authorships in 2026 (Prestige Index = -0.03). An FAP of 54.3% is prognosticated for the year 2026.

59x74mm (300 x 300 DPI)

1  
2 **Online Supplement**  
3  
4

5 **Gender disparities in high-quality dermatology research - a study**  
6 **on scientific authorships**  
7  
8  
9

10 Michael H. K. Bendels<sup>1</sup>, Michelle C. Dietz<sup>1</sup>, Dörthe Brüggmann<sup>1</sup>, Gerhard M. Oremek<sup>1</sup>, Norman Schöffel\*<sup>1</sup>, and David A. Groneberg\*<sup>1</sup>  
11

12  
13 <sup>1</sup>Division of Computational Medicine, Institute of Occupational, Social, and Environmental Medicine, Goethe University Frankfurt, Germany  
14  
15

16 **Correspondence:**

17 Dr. med. Dr. rer. nat. Michael H.K. Bendels, MD, PhD

18 **Postal Address:**

19 Theodor-Stern-Kai 7

20 60590 Frankfurt

21 Germany  
22

23  
24 Phone: +49-69-6301-6650

25 Fax: +49-69-6301-7053

26 email: michael.bendels@outlook.com

27 [www.asu.med.uni-frankfurt.de](http://www.asu.med.uni-frankfurt.de)  
28  
29

30  
31 **Content:**

32  
33 **SFig 1: Gender Detection Output by Time.**

34  
35 **SFig 2: Quality of algorithmic gender detection by country.**

36  
37 **SFig 3: Bibliometric overview.**

38  
39 **SFig 4: Test for alphabetical ordering of the author list.**

40  
41 **SFig 5: Probability density function of the citation rate.**  
42  
43  
44

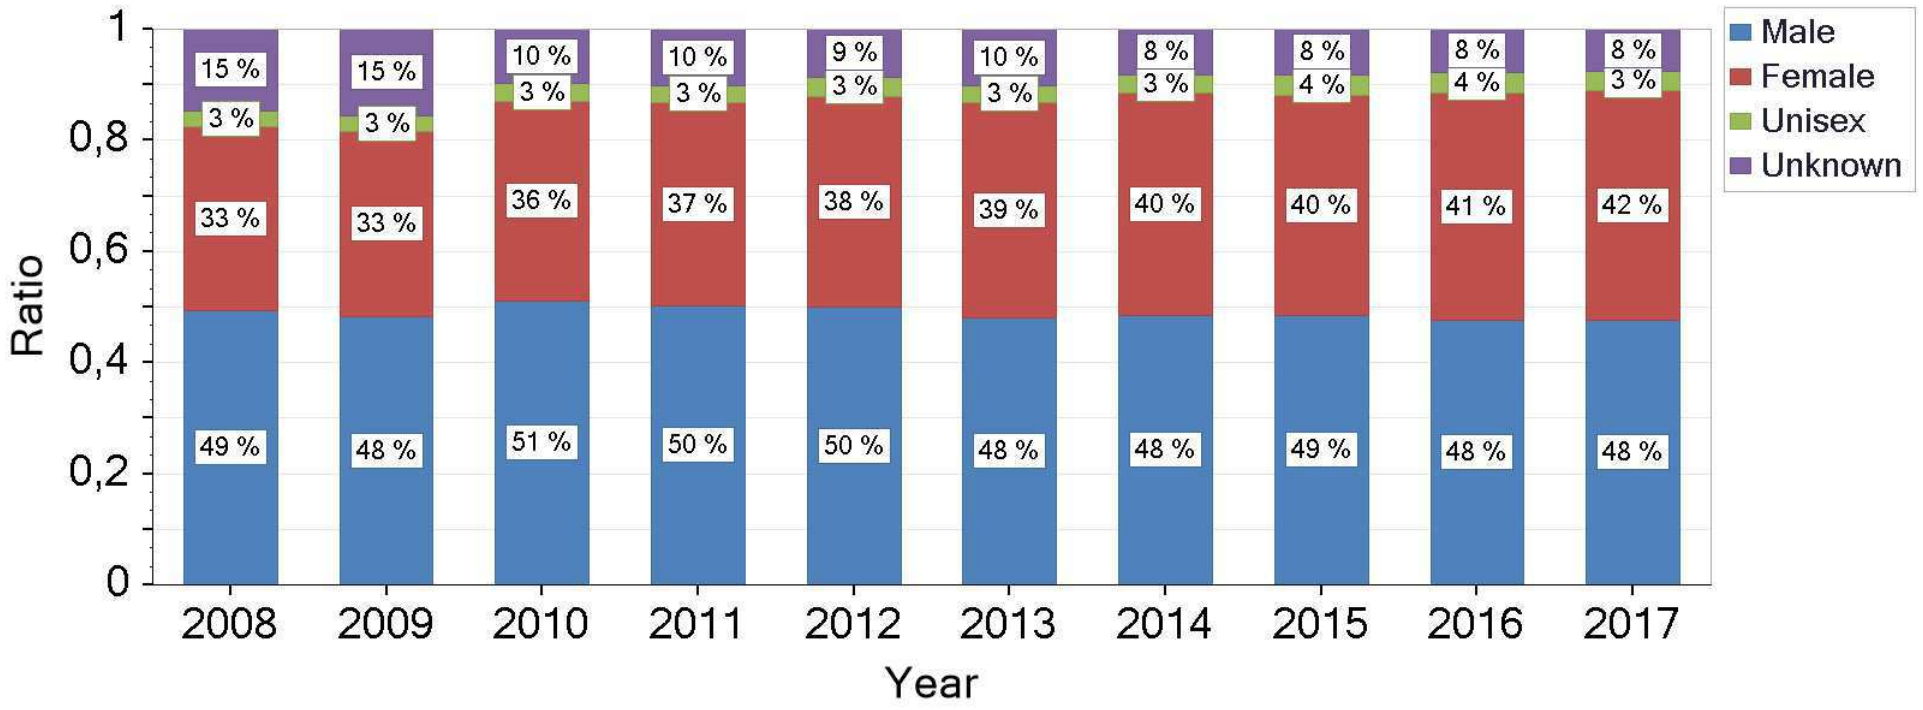

**SFig 1: Gender Detection Output by Time.** The ratios of detected male, female, unisex and undefined authorships ordered by publication year document a relatively small inter-annual variability.

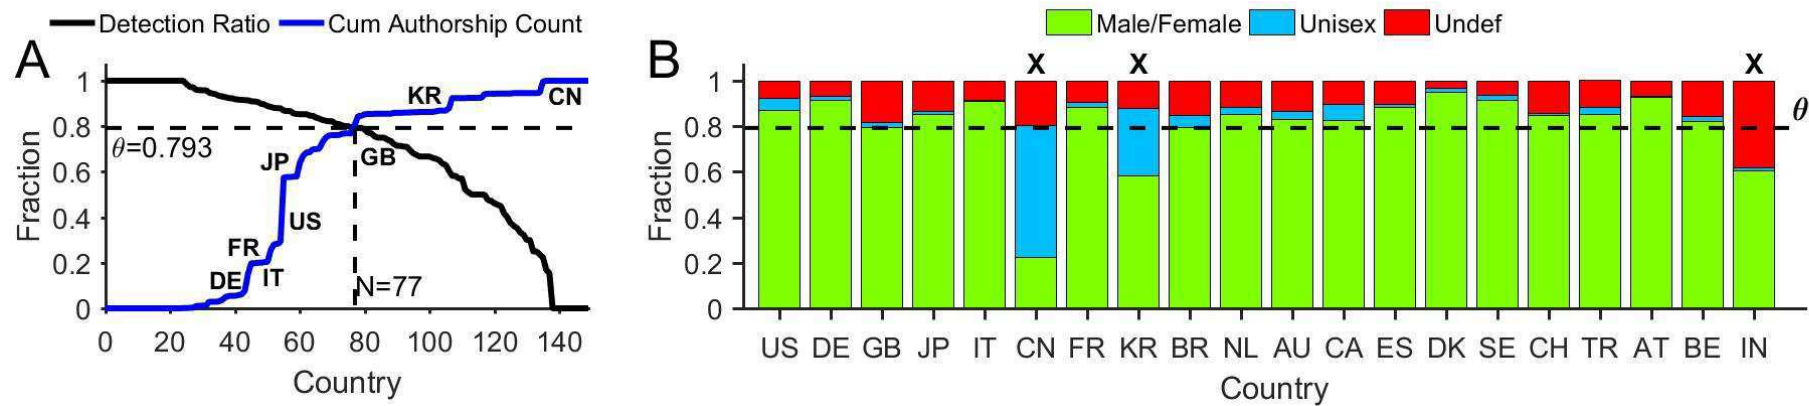

**SFig 2: Quality of algorithmic gender detection by country.** (A) An adaptive threshold country criterion  $\theta$  for the inclusion of a country in the country-specific gender analysis was defined by a ROC-like curve incorporating both detection ratio and cumulative author count [1]. In this study, countries with a detection rate of at least  $\theta = 0.793$  male + female authors (i.e. 79.3% of all authorships) from N=77 countries were included in the country-specific analysis. Countries with a large amount of authors are indicated by country code. (B) The result of the algorithmic gender detection - classified as male/female, unisex or undefined - grouped by countries that are ordered in descending order by their publication count, documents a relative high frequency of male/female authors for most of the top 20 countries, with the exception of the Asian countries China (CN), South Korea (KR), and India (IN). The latter countries are characterized by a high frequency of unisex (CH, KR) or unknown names (IN) and are excluded (X) from analysis due to the threshold criterion  $\theta$  (dotted line). AU=Australia, AT=Austria, BE=Belgium, BR=Brazil, CA=Canada, CH=Switzerland, CN=China, DE=Germany, DK=Denmark, ES=Spain, FR=France, GB=United Kingdom, IL=Israel, IN=India, IT=Italy, JP=Japan, KR=South Korea, NL=Netherlands, SG=Singapore, SE=Sweden, TR=Turkey, US=United States.

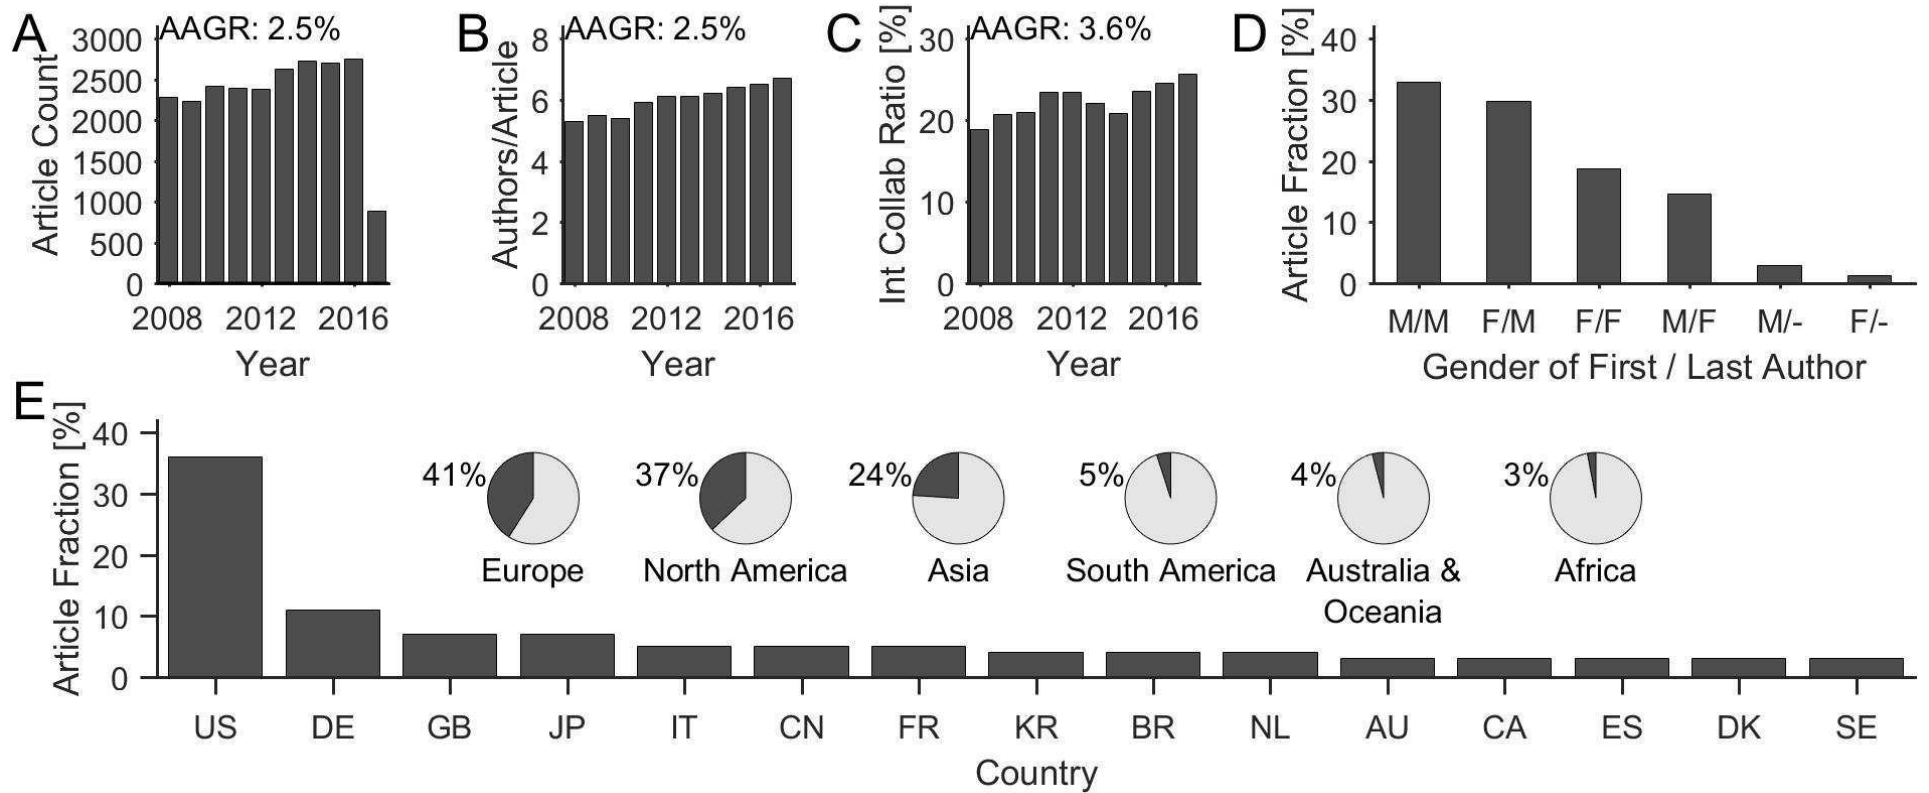

**Sfig 3: Bibliometric overview.** (A) The article count increases from 2,281 in 2008 to 2,750 in 2015; the average annual growth rate (AAGR) is 2.5%. (B) The number of authors per article increases from 5.3 authors/article in 2008 to 6.7 authors/article in 2017. (C) The percentage of international collaboration articles increases from 18.9% in 2008 to 25.6% in 2017 with an AAGR of 3.6%. (D) The fraction of articles grouped the gender of their key authors' documents a quantitative superiority of articles with male last authorships. (E) The fraction of articles is depicted by country (bar plot) and by continent (pie charts). Please note that the sum of percentages is greater than one due to international collaborations. AU=Australia, BR=Brazil, CA=Canada, CH=Switzerland, CN=China, DE=Germany, DK=Denmark, ES=Spain, FR=France, GB=United Kingdom, IT=Italy, KR=South Korea, NL=Netherlands, SE=Sweden, US=United States.

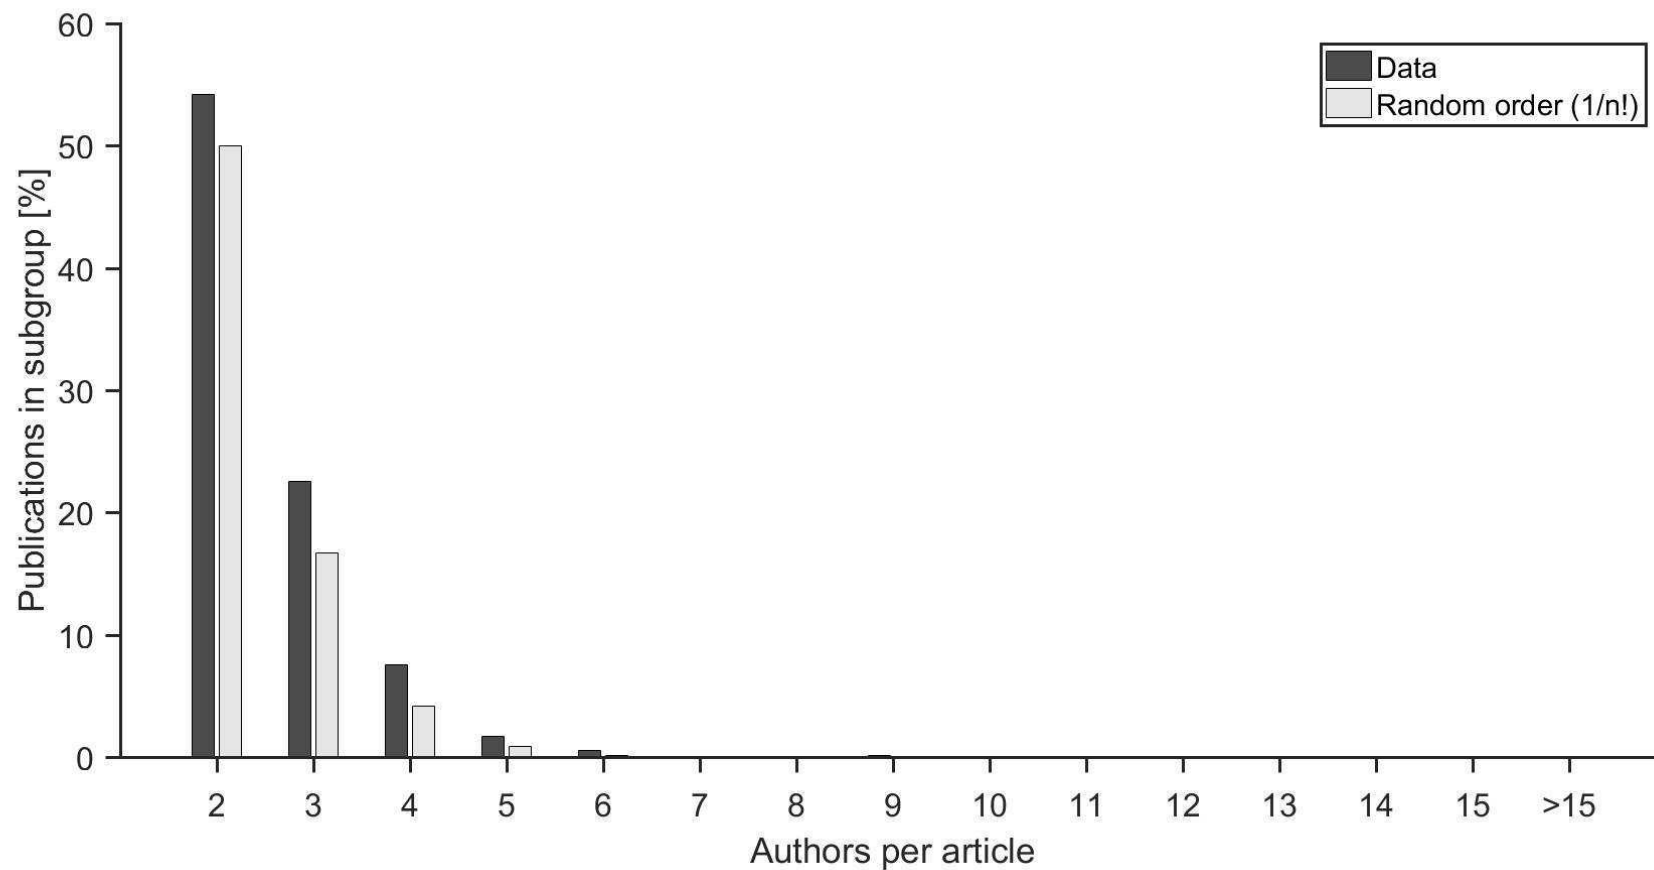

**SFig 4: Test for alphabetical ordering of the author list.** The proportion of publications with an alphabetic ordered author list is depicted with respect to the authors per article (blue). The values correspond very closely to those obtained for randomly ordered author lists (yellow).

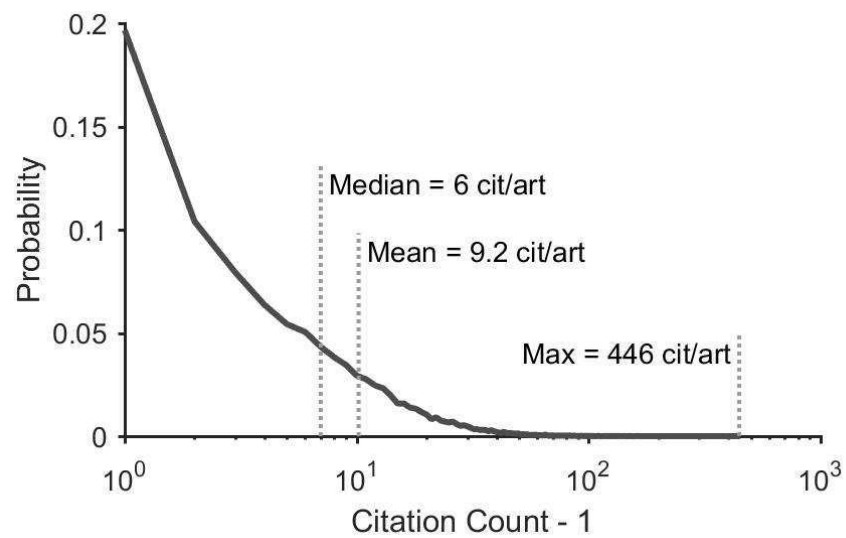

**Sfig 5: Probability density function of the citation rate.** The semi-logarithmic plot of the citation count per article (=citation rate) exhibits an exponential-like decreasing probability density function with a mean citation rate of 9.2 citations/article.



## References

1. Bendels MHK, Brüggmann D, Schöffel N, Groneberg DA. Gendermetrics.NET: a novel software for analyzing the gender representation in scientific authoring. *J Occup Med Toxicol.* 2016;11:43.

For peer review only

# BMJ Open

## Gender disparities in high-quality dermatology research - a descriptive bibliometric study on scientific authorships

|                                 |                                                                                                                                                                                                                                                                                                                                                                                                                                                                                                                                                                                                                                                                                                                                                                                                                                                         |
|---------------------------------|---------------------------------------------------------------------------------------------------------------------------------------------------------------------------------------------------------------------------------------------------------------------------------------------------------------------------------------------------------------------------------------------------------------------------------------------------------------------------------------------------------------------------------------------------------------------------------------------------------------------------------------------------------------------------------------------------------------------------------------------------------------------------------------------------------------------------------------------------------|
| Journal:                        | <i>BMJ Open</i>                                                                                                                                                                                                                                                                                                                                                                                                                                                                                                                                                                                                                                                                                                                                                                                                                                         |
| Manuscript ID                   | bmjopen-2017-020089.R2                                                                                                                                                                                                                                                                                                                                                                                                                                                                                                                                                                                                                                                                                                                                                                                                                                  |
| Article Type:                   | Research                                                                                                                                                                                                                                                                                                                                                                                                                                                                                                                                                                                                                                                                                                                                                                                                                                                |
| Date Submitted by the Author:   | 23-Feb-2018                                                                                                                                                                                                                                                                                                                                                                                                                                                                                                                                                                                                                                                                                                                                                                                                                                             |
| Complete List of Authors:       | Bendels, Michael; Goethe-Universität Frankfurt am Main, Institute of Occupational Medicine, Social Medicine and Environmental Medicine<br>Dietz, Michelle; Goethe-Universität Frankfurt am Main, Institute of Occupational Medicine, Social Medicine and Environmental Medicine<br>Brüggmann, Dörthe; Goethe-Universität Frankfurt am Main, Institute of Occupational Medicine, Social Medicine and Environmental Medicine<br>Oremek, Gerhard; Goethe-Universität Frankfurt am Main, Institute of Occupational Medicine, Social Medicine and Environmental Medicine<br>Schöffel, Norman; Goethe-Universität Frankfurt am Main, Institute of Occupational Medicine, Social Medicine and Environmental Medicine<br>Groneberg, David; Goethe-Universität Frankfurt am Main, Institute of Occupational Medicine, Social Medicine and Environmental Medicine |
| <b>Primary Subject Heading</b>: | Dermatology                                                                                                                                                                                                                                                                                                                                                                                                                                                                                                                                                                                                                                                                                                                                                                                                                                             |
| Secondary Subject Heading:      | Medical publishing and peer review                                                                                                                                                                                                                                                                                                                                                                                                                                                                                                                                                                                                                                                                                                                                                                                                                      |
| Keywords:                       | odds ratio, prestige, citations, productivity, career                                                                                                                                                                                                                                                                                                                                                                                                                                                                                                                                                                                                                                                                                                                                                                                                   |
|                                 |                                                                                                                                                                                                                                                                                                                                                                                                                                                                                                                                                                                                                                                                                                                                                                                                                                                         |

SCHOLARONE™  
Manuscripts



# Gender disparities in high-quality dermatology research - a descriptive bibliometric study on scientific authorships

Michael H. K. Bendels<sup>1</sup>, Michelle C. Dietz<sup>1</sup>, Dörthe Brüggmann<sup>1</sup>, Gerhard M. Oremek<sup>1</sup>,  
Norman Schöffel<sup>1\*</sup>, and David A. Groneberg<sup>1\*</sup>

<sup>1</sup>Goethe-Universität Frankfurt am Main, Institute of Occupational Medicine, Social Medicine  
and Environmental Medicine, Division of Computational Medicine

\*: equally distributed

Correspondence:

Dr. med. Dr. rer. nat. Michael H.K. Bendels, MD, PhD  
Consultant Neurologist, Consultant Occupational Physician, Computer Scientist (TU Berlin)  
Postal Address:  
Theodor-Stern-Kai 7  
60590 Frankfurt  
Germany

Phone: +49-69-6301-6650

Fax: +49-69-6301-7053

email: [bendels@med.uni-frankfurt.de](mailto:bendels@med.uni-frankfurt.de)

[www.asu.med.uni-frankfurt.de](http://www.asu.med.uni-frankfurt.de)

## List of Abbreviations

**AAGR:** Average Annual Growth Rate

**FAOP:** Proportion of Female Authorships

**FAP:** Female Authorship Ratio

**PI:** *Prestige Index*

For peer review only

## Abstract

**Objective:** The present study aims to elucidate the state of gender equality in high-quality dermatological research by analyzing the representation of female authorships from January, 2008 to May, 2017.

**Design:** Retrospective, descriptive study.

**Setting:** 113,189 male and female authorships from 23,373 research articles published in twenty-three dermatological Q1 journals were analyzed with the aid of the Gendermetrics Platform.

**Results:** 43.0% of all authorships and 50.2% of the first-, 43.7% of the co- and 33.1% of the last-authorships are held by women. The corresponding female-to-male odds ratios are 1.41 (CI: 1.37-1.45) for first authorships, 1.07 (CI: 1.04-1.10) for co-authorships and 0.60 (CI: 0.58-0.62) for last authorships. The annual growth rates are 1.74% overall and 1.45% for first authorships, 1.53% for co-authorships, and 2.97% for last authorships. Women are slightly underrepresented at prestigious authorships compared to men (Prestige Index = -0.11). The underrepresentation remains stable in highly competitive articles attracting the highest citation rates, namely, articles with many authors and articles that were published in highest-impact journals. Multi-author articles with male key authors are only slightly more frequently cited than those with female key authors. Women publish slightly fewer papers compared to men (47.2% women hold 43.0% of the authorships). At the level of individual journals, there is a high degree of uniformity in gender-specific authorship odds. By contrast, distinct differences at country level were revealed. The prognosis for the next decades forecasts a consecutive harmonization of authorship odds between the two genders.

**Conclusions:** In high-quality dermatological research, the integration of female scholars is advanced as compared to other medical disciplines. A gender gap consists mainly in the form of a career dichotomy, with many female early career researchers and few women in

1  
2  
3 academic leadership positions. However, this gender gap has been narrowed in the last  
4  
5 decade and will likely be further reduced in the future.  
6  
7  
8  
9

10 **Keywords:** odds ratio; prestige; citations; productivity; career  
11  
12  
13  
14  
15

### 16 **Strengths and limitations of this study**

- 17 • The Gendermetrics Platform is a well-established system to analyze gender  
18 disparities in science by considering the gender-specific distribution of first, co- and  
19 last authorships.  
20  
21  
22  
23
- 24 • The purely bibliometric and algorithmic approach allows analyses of large volumes of  
25 data standardized and independent of the examiner, and thus with a minimized  
26 interindividual variability.  
27  
28  
29
- 30 • Our analysis is limited by the absence of information concerning equally distributed  
31 authorships, corresponding authors, as well as data providing information about the  
32 scholar's academic degree, their position, age, employment status and their  
33 participation on editorial boards.  
34  
35  
36  
37  
38  
39
- 40 • The investigation period is technically limited to articles that are published after 2006  
41 due to the predominance of initials preventing a correct gender identification by first  
42 names in older articles.  
43  
44  
45  
46  
47  
48  
49  
50  
51  
52  
53  
54  
55  
56  
57  
58  
59  
60

## Introduction

The past decades have seen an enormous increase in the number of women entering medicine<sup>1</sup>: While in 1969, 6.9% of the U.S. medical graduates were women, the percentage reached a value of 47.5% in 2014<sup>2</sup>. The enrollment in U.S. medical school in 2016 was almost evenly divided between women (49.8%) and men (50.2%)<sup>3</sup>. Despite this enormous increase of women entering the field of medicine, "across medicine and dermatology, this influx has not been accompanied by a parallel progress by female faculty with academic credentials or in leadership roles", as stated by an editorial of Alexa Kimball<sup>4</sup> and many articles have addressed different gender and generational aspects in academic dermatology in the past years<sup>5-9</sup>. In 2012, Sadeghpour et al. published results from a national survey on the role of gender in academic dermatology<sup>1</sup>. They assessed whether there is an association between gender and academic rank. They came to the conclusion that gender-based differences in academic dermatology, including career track, academic rank distribution, leadership, and career satisfaction, persist<sup>1</sup>. Of a total of 259 full-time US academic dermatologists (38.6% were female), they found that men held more senior positions even after adjustment for age and number of years since completion of residency<sup>1</sup>. Working hours did not differ significantly. While most men (90.3%) and women (82.8%) were satisfied with their career, women were 24.6% more likely than men to consider leaving academia<sup>1</sup>. In line with these findings, Shi et al. conducted in 2017 a cross-sectional observational study of dermatology departments and divisions in the U.S. revealing that women account for 47.9% of dermatology residency program directors (PD) but comprise only 23.5% of chairpersons/chiefs<sup>10</sup>. Another recent study investigates the influence of women in academic dermatology by assessing the number of women acting as editors-in-chief of prominent dermatology journals<sup>11</sup>. The study revealed that there have been 26 female editors and at least 128 male editors in the considered 25 dermatology journals and that

1  
2  
3 45.8% of journals have not yet had a female editor<sup>11</sup>. Moreover, the study clearly showed  
4  
5 that in the last decades there has been an increase in the number of women holding these  
6  
7 prestigious positions.  
8

9  
10 As stated previously, an indicator for the balance between integration of female and male  
11  
12 dermatologists and scientists is the quantification of their scholastic activity as represented  
13  
14 by "authorship" in scientific publications<sup>12-15</sup>. In general, authorships represent the currency  
15  
16 system of research and academic community<sup>16</sup>. In original medical articles, the assignment  
17  
18 of authorship follows, by convention, the rule that "the first author indicates the person  
19  
20 whose work underlies the paper as a whole"<sup>17</sup>, whereas the last authorship "indicates a  
21  
22 person whose work or role made the study possible without necessarily doing the actual  
23  
24 work"<sup>17</sup>. Thus, the assignment of authorships differs considerably from, for example,  
25  
26 economics or mathematics, where authors are usually listed in alphabetical order<sup>16</sup>. One  
27  
28 consequence is that an early-career researcher normally publishes as first or co-author,  
29  
30 whereas a senior researcher prefers the last author position in original research articles<sup>18,19</sup>.  
31  
32 A further consequence of this assignment rule is that the different types of authorships are  
33  
34 associated with different prestige. Specifically, first and last authorships have a significantly  
35  
36 higher reputation than co-authorships<sup>18</sup>.  
37  
38  
39  
40  
41  
42  
43  
44

45 Based on these consideration, we here applied the recently established Gendermetrics  
46  
47 Platform<sup>20</sup> to analyze the integration of women in high-quality dermatological research by  
48  
49 assessing 113,189 male and female authorships from twenty-three dermatological Q1  
50  
51 journals.  
52

53  
54 Conceptually, we determined the proportion of female first, co- and last authorships and  
55  
56 quantified the relative distribution of female authorships among the different authorships  
57  
58  
59



1  
2  
3 compared to men by applying odds ratios. Moreover, we used the *Prestige Index* to analyze  
4  
5 the distribution of prestigious authorships between the two genders. The analysis includes  
6  
7 global status and temporal development, differences across countries and the role women  
8  
9 tend to have in articles with many authors, e.g. collaboration on articles <sup>14</sup>. Moreover, a  
10  
11 gender-specific analysis of scholarly productivity and citation rate was conducted. The study  
12  
13 concludes with a ten-year forecast regarding the development of gender disparities in the  
14  
15 field of high-quality dermatological research.  
16  
17  
18  
19  
20  
21  
22  
23  
24  
25  
26  
27  
28  
29  
30  
31  
32  
33  
34  
35  
36  
37  
38  
39  
40  
41  
42  
43  
44  
45  
46  
47  
48  
49  
50  
51  
52  
53  
54  
55  
56  
57  
58  
59  
60

## Methods

### Data acquisition & integration

The data analysis was conducted using Gendermetrics.NET<sup>20</sup>, a SQL-Server based Platform for analyzing bibliometric data with a special emphasis on gender aspects. Research articles from high impact dermatology journals listed in the Scimago Journal & Country Rank database (<http://www.scimagojr.com/journalrank.php?category=2708>) were acquired on May 15, 2017 from the Web of Science Core Collection (Thomson Reuters). The journals constitute the subset of dermatological Q1 journals in 2016 representing the top 25% of the corresponding impact factor distribution. The journals '*Fibrogenesis and Tissue Repair*', '*Infectious Diseases in Obstetrics and Gynecology*' and '*Dermatology and Therapy*' were not considered because there were not indexed in the Web of Science database. The journals '*Aids Research and Treatment*', '*BMC Dermatology*', '*Clinics in Dermatology*', '*Dermato-Endocrinology*' and '*HIV/AIDS-Research and Palliative Care*' were excluded from analysis due to a low number of articles (< 200 articles). Furthermore, the journals '*British Journal of Dermatology*' and '*Journal of the European Academy of Dermatology and Venereology*' had to be excluded from analysis due to the predominant usage of initials instead of full first names, which prevents the correct gender determination. In total, 23 of the 33 dermatological Q1-journals with 23,373 articles written by 74,354 authors remain for analysis.

### Gender determination

The algorithmic gender determination operates on the basis of a data table containing the gender of 77,818 forenames (male, female or unisex), see Bendels et al.<sup>20</sup>. By applying the algorithm, 30,538 (= 41.1%) male authors, 27,261 (= 36.7%) female authors, 5,509 (= 7.4%) unisex authors and 11,046 (= 14.9%) undefined authors were determined with a relatively little inter-annual variability (supplementary Fig. 1). The Unisex and undefined authors and

1  
2  
3 their authorships were not taken into consideration (in total 27,182 authorships). As a result,  
4  
5 113,189 male and female authorships affiliated to institutions from 150 countries were  
6  
7 analyzed. The research output of a country was thereby benchmarked by considering the  
8  
9 authorships of the related institutions<sup>14</sup>. It is important to note, that the quality of gender  
10  
11 detection depends on the authorships country as illustrated by supplementary Fig. 2. In  
12  
13 order to ensure the validity of the *country-specific* analysis, we set a threshold criterion for  
14  
15 the country-specific analysis (supplementary Fig. 2), as recently described in Bendels et al.<sup>20</sup>.  
16  
17 In particular, only countries with a detection rate of at least 79.3% male or female  
18  
19 authorships were considered. As a result, among the top 20 most productive countries, the  
20  
21 Asian countries China, South Korea (with high rates of unisex names) and India (with many  
22  
23 undefined names) were excluded. A bibliometric overview is given in supplementary Fig. 3.  
24  
25  
26  
27

### 28 **Proportion of Female Authorships (FAP) & Female Authorship Odds Ratio (FAOR)**

29 In this study, first-, co- and last-authorships were considered, whereby co-authorships  
30  
31 encompasses all authorships between *one* first- and *one* last-authorship. Equally distributed  
32  
33 authorships were not considered due to a lack of information. The ***proportion of female***  
34  
35 ***authorships (FAP)*** is defined as the quotient between the female authorship count and the  
36  
37 total sum of male and female authorships. The FAP is presented as a percentage to improve  
38  
39 the textual readability. The female to male odds ratios for first-, co- and last-authorships  
40  
41 were determined (***female authorship odds ratio, FAOR***) with the corresponding confidence  
42  
43 intervals at a confidence level of 95%<sup>14</sup>. The FAOR measures the female odds of securing a  
44  
45 particular authorship type compared to men. A FAOR of e.g. 2.0 or 0.5 means that women or  
46  
47 men, respectively, have twice the odds of holding a particular authorship compared to  
48  
49 respective other gender<sup>14</sup>. For a simplified representation, a triplet is used to indicate the  
50  
51 sign of the *significant* female odds ratio excess to get a particular authorship. For example,  
52  
53  
54  
55  
56  
57  
58  
59  
60

1  
2  
3 the FAOR-triplet (-, =, +) indicates that women have *significantly* lower odds ratios for first-,  
4  
5 equal odds ratios for co- and significantly higher odds ratios for last-authorships compared  
6  
7 to men<sup>14</sup>. In summary, the FAP measures the quantitative representation of female  
8  
9 authorships, whereas the FAORs quantify the relative distribution of female authorships  
10  
11 among the different authorships<sup>14</sup>. To increase the statistical significance, the FAP/FAOR-  
12  
13 classification is only conducted for subjects (e.g. countries, journals) with at least 750 male  
14  
15 or female authorships.  
16  
17

### 18 19 20 **Prestige Index**

21 The *Prestige Index* measures the female odds of holding prestigious authorships compared  
22  
23 to men<sup>14</sup>. It is defined as the prestige-weighted average of the FAOR excess  $\varepsilon_t$  that is  
24  
25 calculated over all authorship types  $t$  (i.e. for first, co- and last authorships),  $\varepsilon_t = w_t (\text{FAOR}_t -$   
26  
27  $1)$ , if  $\text{FAOR}_t \geq 1$ , otherwise  $\varepsilon_t = w_t (1 - 1/\text{FAOR}_t)$  with the weighting factor  $w_t$ <sup>14</sup>. In medical  
28  
29 science, the prestige of scholarships follows a ranked order with a higher reputation of first  
30  
31 and last authorships and a lower reputation of co-authorships<sup>18</sup>. Specifically, a potentially  
32  
33 alphabetical ordering of the author list was excluded by an additional test (supplementary  
34  
35 Fig. 4). Therefore, co-authorships were weighted negatively ( $w_{\text{co}} = -1$ ), whereas first and last  
36  
37 authorships were weighted positively ( $w_{\text{first}} = w_{\text{last}} = 1$ )<sup>14</sup>. This definition implies that the  
38  
39 *Prestige Index* is e.g. lowered by both higher odds for co-authorships and lower odds for first  
40  
41 and last authorships. A value of 0 characterizes a balanced distribution of prestigious  
42  
43 authorships between the two genders, whereas a value above (below) 0 indicates an excess  
44  
45 (lack) of prestigious authorships held by women.  
46  
47  
48  
49  
50

### 51 52 **Analysis of data**

53 Average annual growth rates (AAGR) were applied to characterize annual growth rates<sup>14</sup>. The  
54  
55 AAGRs of both, FARs and number of authorships were used to make a linear prognosis of the  
56  
57  
58  
59  
60

1  
2  
3 temporal development of FAP, FAOR and *Prestige Index* for the coming decade. The Pearson  
4  
5 correlation was applied to evaluate the linear association between the FAP, the *Prestige*  
6  
7 *Index* and the journals' mean impact factor. The latter was calculated over the years 2008 to  
8  
9 2016/2017. The null hypothesis, whether the *non-normally* distributed gendered citation  
10  
11 rates (supplementary Fig. 5) stem from the same distribution, was tested by a Kruskal-Wallis-  
12  
13 test and a post-hoc multi-comparison test. The significance threshold was set at .05.  
14  
15

### 16 17 18 19 **Patient and Public Involvement statement**

20 No patients were involved in the study.  
21  
22  
23  
24  
25  
26  
27  
28  
29  
30  
31  
32  
33  
34  
35  
36  
37  
38  
39  
40  
41  
42  
43  
44  
45  
46  
47  
48  
49  
50  
51  
52  
53  
54  
55  
56  
57  
58  
59  
60

## Results

### Female authorships on a global level

In a first step, we analyzed the representation of female authorships on a global level. The analysis reveals an underrepresentation of female authorships with a FAP of 43.0% (Fig. 1A, bottom), relatively more first-authorships (50.2%), an almost equal proportion of female co-authorships (43.7%) and a substantially less fraction of last-authorships (33.1%). The corresponding FAORs (Fig. 1A) are 1.41 (CI: 1.37-1.45) for first authorships, 1.07 (CI: 1.04-1.10) for co-authorships and 0.60 (CI: 0.58-0.62) for last authorships. The differences are statistically significant ( $P < .05$ ) for all types of authorships between the two genders. Thus, the global FAOR-pattern is characterized by the FAOR-triplet (+, +, -), i.e. women have significant higher odds for first and co-authorships and significant lower odds for last-authorships. The *Prestige Index* is on average -0.11, indicating a minor lack of prestigious authorships held by women (Fig. 1A, bottom).

The FAP exhibits a relatively high increase over the evaluation period (39.5% in 2008, 46.1% in 2017, Fig. 1B) with an AAGR of 1.74%. The subanalysis reveals a disproportionally high annual growth for last authorships (2.97%) and disproportionally low values for co- (1.53%) and first authorships (1.45%). Overall, this led to more gender-neutrality in authorships odds during the recent years, as also indicated by the *Prestige Index* (-0.19 in 2008 and -0.11 in 2017).

### Differences across countries

When we refined our analysis from global to country-specific level, we identified among the most productive countries a wide range of FAPs that extent from 66.7% in Finland to 25.3% in Japan (Table 1). Different FAOR-patterns were identified ranging from *unfavorable* with the FAOR-triplet (=, +, -) identified in Poland, Italy, and Spain to *favorable* with the FAOR-triplet (+, -, =) in Denmark, Finland and the Netherlands (Table 1). Israel provides gender-

1  
2  
3 neutrality with respect to all authorships (FAOR-triplet (=, =, =)). The majority of the  
4  
5 countries exhibit FAOR-patterns that are characterized by lower female odds for last and  
6  
7 higher female odds for first authorships compared to men. Remarkably, there is not a single  
8  
9 country where women have currently higher odds for a last authorship compared to men.  
10

11  
12 When considering the distribution of prestigious authorships, we found countries with very  
13  
14 high *Prestige Indices*, like Denmark (*Prestige Index* = 0.60), Finland (0.54), and the  
15  
16 Netherlands (0.42). In these countries, women have higher odds to hold a prestigious  
17  
18 authorship compared to men. By contrast, Italy (*Prestige Index* = -0.46), Spain (-0.50), Japan  
19  
20 (-0.51) and Austria (-0.58) are characterized by a lack of prestigious authorships held by  
21  
22 women. Remarkably, we found no significant correlation between the FAP of a country and  
23  
24 its *Prestige Index* ( $r(18)=0.36, P>.05$ ).  
25  
26  
27  
28

### 29 **Differences across journals**

30  
31 At the level of individual journals, the FAP ranges from 53.4% in *Sexually Transmitted*  
32  
33 *Diseases* to 32.9% in *Lasers in Surgery and Medicine* (Table 2). The predominant FAOR-  
34  
35 pattern is characterized by the FAOR-triplet (+, =, -). Moreover, in almost all journals (with  
36  
37 the exception of *Contact Dermatitis*) women have significant lower odds for last-  
38  
39 authorships. Furthermore, in our analysis, there is no journal, where a) male scholars have  
40  
41 significantly higher odds for first authorships compared to their female counterparts, and b)  
42  
43 where women have higher odds to secure last authorships than men.  
44  
45  
46

47  
48 The *Prestige Index* value range is from -0.50 to 0.19 (Table 2): Best odds for women to secure  
49  
50 prestigious authorships are given in *Contact Dermatitis* (*Prestige Index* = 0.19) and *Acta*  
51  
52 *Dermato-Venereologica* (0.11), whereas *Dermatology* (-0.5) and *Mycoses* (-0.41) provide  
53  
54 best odds for male scholars. We found no significant correlation between the a) FAP of the  
55  
56  
57  
58  
59  
60

1  
2  
3 journal and its Mean Impact Factor ( $r(21)=0.08$ ,  $P>.05$ ), b) the *Prestige Index* and the Mean  
4  
5 Impact Factor ( $r(21)=0.37$ ,  $P>.05$ ), and c) the FAP and the *Prestige Index* ( $r(21)=0.08$ ,  $P>.05$ ).  
6  
7

### 8 **Female authorships by authors per article**

9 We also assess the role women tend to have in articles with many authors, e.g. collaborative  
10  
11 articles. The FAP fluctuates between 40.9% (1-3 authors/article) and 43.7% (7-9  
12  
13 authors/article) and exhibits no significant correlation to the number of authors per article.  
14  
15 Although the FAORs for first and last authorships have the tendency to slightly increase and  
16  
17 decrease, respectively, with an increasing number of authors, this trend is reversed for  
18  
19 higher author rates (>12 authors/article) (Fig. 2). In addition, the FOAR for co-authorships  
20  
21 shows no significant relationship to the author rate. As a consequence, the *Prestige Index*  
22  
23 fluctuates between -0.02 (13-15 authors/article) and -0.21 (>15 authors/article). To  
24  
25 summarize, FAP, FAORs and *Prestige Index* show no clear correlation to the number of  
26  
27 authors per article.  
28  
29  
30  
31  
32

### 33 **Citation & Productivity Analysis**

34 The analysis reveals that articles with male key authors are more frequently cited than  
35  
36 articles with female authors (Fig. 3A). However, the differences are very low as articles with  
37  
38 a male last or first author have average citation rates of 9.7 citations/article and 9.6  
39  
40 citations/article, respectively and articles with a female first or last author exhibit citation  
41  
42 rates of 9.1 citations/article and 9.0 citations/article, respectively. Statistically significant  
43  
44 differences in the distributions of citation rates were only found between articles with male  
45  
46 last authors and all other article groups (Kruskal-Wallis-Test,  $P<.05$ ). Articles with a female  
47  
48 first or last authorship were on average below the mean citation rate of 9.2 citations/article.  
49  
50  
51

52  
53 The analysis of combined authorships shows that male-first/female-last and male-first/male-  
54  
55 last articles have on average the highest citation rates with 10.1 citations/article and 9.9  
56  
57  
58  
59  
60



1  
2  
3 citations/article, respectively, followed by female-first/male-last (9.5 citations/article) and  
4  
5 female-first/female-last (8.5 citations/article) articles (Figure 3A, right). Single-authored  
6  
7 articles have the lowest citation rates with slightly higher citation rates for male-authored  
8  
9 articles (6.8 citations/article vs. 6.5 citations/articles).

10  
11  
12 The analysis further demonstrates that statistically the citation rate of an article gets higher  
13  
14 the more authors are involved, e.g. articles with 1-3 authors are on average cited 7.8 times,  
15  
16 whereas articles with more than 15 authors are cited 15.9 times on average (Fig. 3B).  
17  
18 Furthermore, the revealed differences in the citation rates between articles with male or  
19  
20 female key authors are not preserved when articles are grouped by the length of their  
21  
22 author list, as shown by Fig. 3B. In this grouping scheme, articles with female last authors  
23  
24 and more than 15 authors attract the highest citation rates of on average 18.6 citations per  
25  
26  
27  
28  
29 article.

30  
31  
32 Considering the gender-specific distribution of the article count per author, we found, that  
33  
34 the subgroups 'author of 1 article' and 'author of 2 articles' are relatively dominated by  
35  
36 women. In particular, 71.5% of the female authors, but only 68.1% of the male authors had  
37  
38 published a single article in our data set (Fig. 3C). By contrast, all other subgroups with three  
39  
40 or more articles per author show a relative overrepresentation of male authors. Particularly,  
41  
42 the subgroup of most productive authors ('author of more than 10 articles') is considerably  
43  
44 dominated by men (2.4% of the male authors vs. 1.2% of the female authors). This finding  
45  
46 results in a slightly higher productivity of male authors, as 53.0% of male authors hold 57.0%  
47  
48  
49  
50 of all authorships (Fig. 3C).

## Discussion

### Advanced integration of women

The field of high-quality dermatological research is characterized by a moderate underrepresentation of female authorships with an FAP of 43.0%. This value is considerably higher than the previously determined FAPs, which were found for the whole area of science (30%)<sup>13</sup>, for six high-quality medical journals (34%)<sup>21</sup>, and for similar studies from the research fields of epilepsy (39.4%)<sup>14</sup>, schizophrenia (37.6%)<sup>12</sup>, stroke research (36.3%, unpublished data), and lung cancer research (31.3%)<sup>22</sup>, see Table 3.

Female scholars are inhomogeneously distributed across the different authorships: We found many female first authorships and a significantly lower proportion of female last authorships. Evidently, this finding illustrates the well-known, gender-specific career dichotomy as first- or co-authorships are usually held by early career researchers, whereas last authorships are regularly preserved for institutional heads or principal investigators<sup>18</sup>. Such a discrepancy in leadership positions has been described for the most scientific disciplines<sup>13</sup>, including various medical research fields<sup>1,12,14,23-26</sup>. What are the reasons for such a striking career dichotomy between the two genders? Differences in career preferences between men and women are one reason that can be cited in this regard<sup>27</sup>. Specifically, it has been shown that men were more likely to occupy investigative career tracks (26.5% vs. 11.1%), whereas women predominantly occupied clinical educator tracks (81.5% vs. 50.0%) in U.S. dermatology<sup>1</sup>. Other reasons include altered life priorities like family planning<sup>13</sup>, the lack of role models<sup>26</sup>, an insufficient work-life balance<sup>26</sup>, women's increased likelihood to occupy part-time positions<sup>1</sup>, and the consistently high influx of female medical students and graduates<sup>26</sup>.

1  
2  
3 Interestingly, low female odds for last-authorships are numerically compensated by high  
4 female odds for first-authorships. This constellation leads to an almost gender neutral  
5 distribution of prestigious authorships on the global level. This finding is important, since  
6 academic publishing at prestigious authorships is one of the core elements of career  
7 advancement in science<sup>12,28-30</sup>. However, the underrepresentation of last authorships  
8 potentially reduces the further career advancement of the female scientists<sup>31</sup>, since last  
9 authorships are often taken as a major indicator of successful leadership, e.g. by committees  
10 making this a criterion in granting and hiring<sup>18</sup>. In line with this, a cross-sectional survey from  
11 2009 revealed a clear gender difference in academic *senior* ranks of U.S. dermatologists, as it  
12 was reported that "women were predominantly at the assistant professor level (50.0%)  
13 compared with men (24.3%), whereas men were predominantly at the full professor level  
14 (47.4%) compared with women (14.9%)"<sup>1</sup>. Evidently, in dermatology, the proportion of  
15 female faculty members declined as academic rank increased.  
16  
17  
18  
19  
20  
21  
22  
23  
24  
25  
26  
27  
28  
29  
30  
31

### 32 33 **Stable representation of women in multi-author articles results in almost** 34 **gender-neutral citation rates** 35

36 Remarkably, we found no significant relationship between the representation of female  
37 authorships and the number of authors per article. Specifically, the representation of female  
38 authorships remains also stable for articles with high numbers of authors (e.g. collaboration  
39 articles), which statistically attract the highest citation rates (Fig. 3B)<sup>32</sup>. This is an important  
40 result, since it provides a good explanation for the almost equal citation rates of articles that  
41 were grouped by the gender of their keys authors. This is particularly remarkable, since for  
42 all other disciplines we have examined so far, we find a) an accentuating  
43 underrepresentation of women at prestigious authorships with an increasing number of  
44 authors per article and b) significantly higher citation rates of articles with male key authors.  
45  
46  
47  
48  
49  
50  
51  
52  
53  
54  
55  
56  
57 Moreover, previous studies from various disciplines also reported about substantially higher  
58  
59  
60

1  
2  
3 citation rates for articles with male key authors<sup>13,29,31,33-35</sup>. To summarize, well-balanced  
4  
5 citation rates between the two genders suggest that the integration of women in  
6  
7 dermatological science is well-advanced. Methodically, it is important to note that the  
8  
9 determined citation rates describe essentially the situation from the early phase of  
10  
11 investigation (2008-2010), since older articles have a stronger impact on the citation  
12  
13 statistics than newer articles ("Cited Half-Life")<sup>36</sup>.  
14  
15

### 16 17 **Structural position affects productivity**

18 The lower productivity of female scholars (47% female authors hold 43% of the authorships)  
19  
20 is in line with reports from other scientific fields and medical disciplines<sup>12-14,23-25,37</sup>.  
21  
22 Interestingly, we were able to reproduce the clear male overrepresentation at levels of  
23  
24 higher productivity (Fig. 3C), as already shown for the fields of ecology and evolutionary  
25  
26 biology<sup>34</sup>, the medical research fields of schizophrenia<sup>12</sup> and epilepsy<sup>14</sup>, and for the field of  
27  
28 high-quality research from the areas life science, earth & environmental, multidisciplinary  
29  
30 and chemistry<sup>35</sup>. It is reasonable to assume that the primary factors affecting women's  
31  
32 productivity are not higher rejection rates as explicitly shown for the journals *Cortex*<sup>38</sup> and  
33  
34 *Nature Neuroscience*<sup>39</sup>, but rather, due to the position of women within the scientific  
35  
36 system<sup>28,35</sup>. In practice, the mainly male senior scientists are often associated to more or less  
37  
38 fruitful (citation) networks, whereas "women are more likely to work as adjuncts or at  
39  
40 teaching-intensive institutions with limited resources"<sup>28</sup>. This assumption is confirmed by a  
41  
42 previous study from Sadeghpour et al.<sup>1</sup> documenting no differences in the number of  
43  
44 publications of full-time academic dermatologists after adjustment for academic rank.  
45  
46 Moreover, it has been shown by Reed et al.<sup>37</sup> that women's publication rates start to  
47  
48 increase later in their career.  
49  
50  
51  
52  
53  
54  
55  
56  
57  
58  
59  
60

### Distinct regional differences

1  
2  
3  
4 Apart from these global findings, distinct regional differences were found with best-balanced  
5  
6 authorship odds between the two genders in Israel (FAOR-triplet (=, =, =), *Prestige Index* = -  
7  
8 0.01). When taking the chance of holding a prestigious authorship as a general surrogate  
9  
10 parameter for career advancement in science <sup>14</sup>, Denmark, Finland, and the Netherlands  
11  
12 provide the best conditions for female authors. By contrast, Italy, Spain, Japan, and Austria  
13  
14 offer optimal conditions for men in dermatological research. This finding correlates quite  
15  
16 well with the results of the Global Gender Gap Report 2016 as the countries Finland, the  
17  
18 Netherlands and Denmark were ranked 2<sup>nd</sup>, 16<sup>th</sup>, and 19<sup>th</sup>, respectively, whereas the  
19  
20 countries Spain, Italy, Austria, and Japan were ranked 29<sup>th</sup>, 50<sup>th</sup>, 52<sup>nd</sup> and 111<sup>th</sup>, respectively,  
21  
22 out of a total of 144 countries in the world <sup>40</sup>. It is plausible to assume that these regional  
23  
24 differences are not caused by discipline-specific characteristics, but rather, are primarily due  
25  
26 to socio-cultural surroundings, as, for example, Japan is characterized by a strong sense of  
27  
28 patriarchy and traditional gender roles in society <sup>41</sup>. This is all the more relevant, since similar  
29  
30 constellations were found in most of our studies <sup>12,14</sup>. Overall, the given information supplies  
31  
32 women operating in the field of dermatology with a solid basis for decision-making for  
33  
34 professional reorientation or career planning.  
35  
36  
37  
38  
39  
40

41  
42 As in all our previous studies, we did not find a significant correlation between the FAP of a  
43  
44 country and the distribution of prestigious authorships between the two genders <sup>12</sup>. This  
45  
46 means, countries with a high FAP can also provide disadvantageous career opportunities for  
47  
48 women and vice versa. A valuable example is Italy with a high rate of FAP (54.2%) and a  
49  
50 negative *Prestige Index* (-0.46). Interestingly, this finding is contrary to the socio-cultural  
51  
52 theory of the critical mass <sup>42</sup>, postulating a self-sustained harmonization of gender aspects  
53  
54  
55  
56  
57  
58  
59  
60

1  
2  
3 once the participation of women has exceeded a critical threshold value of about 30% to  
4  
5 35%.  
6  
7

### 8 **Journals with a high degree of uniformity**

9 At the level of individual journals, we reveal a striking uniformity of gender-specific  
10  
11 authorship odds, as in 19 out of 23 journals women have significantly higher odds for first  
12  
13 authorships and lower odds for last authorships. Evidently, the global gender-specific  
14  
15 hierarchy of research groups is mapped to the related journals. This finding explains also the  
16  
17 relatively small value range of the journals' Prestige Index compared to that of other  
18  
19 countries ( $\Delta$ Prestige Index: 0.69 vs. 1.18). Remarkably, we do not find a significant  
20  
21 correlation between the impact of a journal (characterized by the SJRI) and the revealed  
22  
23 Prestige Index measuring the distribution of prestigious authorships between the two  
24  
25 genders. Interestingly, this finding is contrary to our recent study analyzing the female  
26  
27 authorship odds in fifty-four of *highest-quality* research journals listed in the Nature Index,  
28  
29 which covers the journal categories *Life Science, Multidisciplinary, Earth & Environmental*  
30  
31 and *Chemistry*. In this study a clear negative correlation between the 5-year-impact factor of  
32  
33 a journal and its Prestige Index ( $r(52)=-0.63, P<.01$ ) was revealed<sup>35</sup>. In contrast to academic  
34  
35 dermatology, in this cross-discipline group of highest-impact journals, the female  
36  
37 underrepresentation is accentuated in highly competitive articles attracting the highest  
38  
39 citation rates, namely, articles with many authors and articles that were published in  
40  
41 highest-impact journals (Table 3). To conclude, uniformity of authorship odds as well as  
42  
43 stable representation of women regardless of the journal impact speak for an advanced  
44  
45 integration of women and against the predominance of "old boys' networks" in the field of  
46  
47 high-quality dermatology research and its related journals<sup>14</sup>.  
48  
49  
50  
51  
52  
53  
54  
55  
56  
57  
58  
59  
60

### Limitations of the study

Methodically, our purely bibliometric and algorithmic approach enables us to analyze large volumes of data standardized and independent of the examiner, and thus with a minimized interindividual variability. However, as already mentioned in Bendels et al.<sup>14</sup>, it is limited by the absence of information concerning equally distributed authorships, corresponding authors, as well as data providing information about the scholar's academic degree, their position (e.g. Associate Professor vs. Full Professor)<sup>1</sup>, age, employment status and their participation on editorial boards<sup>26,43</sup>. Questionnaires or the inspection of e.g. online profiles provide a better access to this specific data, as shown by other studies<sup>24,26,43</sup>. Furthermore, the investigation period is technically limited to articles that are published after 2006 due to the predominance of first names initials preventing a correct gender identification in older articles<sup>20</sup>. Another limitation of the gender determination by first names is the fact that we had to exclude some countries from the *country-specific* analysis due to a relative high fraction of unisex names (primarily the Asian countries China and South Korea participating at 5% and 4%, respectively, of the articles).

### Conclusion & Outlook

In conclusion, a) the relatively high FAP, b) the almost gender-neutral citation rates, and c) the stable representation of female scholars in both articles with many authors as well as highest impact journals can be considered indicators for an advanced integration of women in high-quality dermatological research compared to other (medical) disciplines (Table 3). However, a considerable career dichotomy is still present, with many female researchers at the beginning of their career and few women in academic leadership positions. Since there is a clear time-dependence present in authorship hierarchy - current early career researchers may be future research leaders – it is plausible to prognosticate a considerable increase of women in academic leadership positions in the next decade. This trend will likely be intense

1  
2  
3 due to the high annual increase of female authorships (1.74%) with the highest rates for the  
4  
5 last author position (2.97%), and the trend of more and more female physicians entering the  
6  
7 field of medicine in many Western countries<sup>2,44</sup>. In line with this perspective, a linear  
8  
9 prognosis of the temporal development of female authorships prognosticates not only an  
10  
11 FAP of 54.3% for the year 2026, but also increasing female odds for last authorships and  
12  
13 decreasing female odds for co-authorships (Fig. 4). This harmonization in authorship odds  
14  
15 results in a Prestige Index that is forecast to become almost gender-neutral in 2026 (*Prestige*  
16  
17 *Index* = -0.03). On this basis, we expect a deeper integration of female scientists with a  
18  
19 growing number of women in academic leadership positions in the next decade. However, it  
20  
21 should be critically mentioned that, contrary to this prediction, various studies recently  
22  
23 report about a striking persistence of gender inequalities regarding academic leadership  
24  
25 positions despite a considerable increase in female first authorships<sup>24-26,45</sup>.  
26  
27  
28  
29  
30

31 In view of this, the present analysis may define a starting point: Continuous monitoring over  
32  
33 the next years will elucidate if female career dichotomy will break down, leading to a more  
34  
35 balanced distribution of research leaders between both genders in dermatological research.  
36  
37  
38  
39  
40  
41  
42  
43  
44  
45

## 46 CONTRIBUTORSHIP STATEMENT

47 MB, NS and DG designed the study. MB and MD collected and performed the analysis. MB,  
48  
49 MD, DB, GO, NS and DAG interpreted the result. MB wrote the first draft of manuscript. MB,  
50  
51 MD, DB, GO, NS and DG contributed to and have approved the final manuscript.  
52  
53  
54  
55  
56  
57  
58  
59  
60



## DATA SHARING STATEMENT

No additional data available.

## COMPLIANCE WITH ETHICAL STANDARDS

**Conflict of Interest:** The authors declare that they have no conflict of interest.

**Funding:** This research received no specific grant from any funding agency in the public, commercial or not-for-profit sectors.

**Ethical approval:** This article does not contain any studies with human participants or animals performed by any of the authors.

## Tables

**Table 1: Country Classification.** Countries are descendingly ordered by their *Prestige Index*.

The number of considered male and female authorships is given by #Authorships.

| Country Name   | Female Authorship Ratio | FAOR-triplet | <i>Prestige Index</i> | #Articles | #Authorships |
|----------------|-------------------------|--------------|-----------------------|-----------|--------------|
| Denmark        | 43.4%                   | (+, -, =)    | 0.60                  | 637       | 2,392        |
| Finland        | 66.7%                   | (+, -, =)    | 0.54                  | 177       | 787          |
| Netherlands    | 44.8%                   | (+, -, =)    | 0.42                  | 941       | 3,400        |
| Brazil         | 56.1%                   | (+, -, -)    | 0.14                  | 959       | 4,141        |
| Turkey         | 45.2%                   | (+, =, =)    | 0.08                  | 518       | 1,930        |
| Sweden         | 53.7%                   | (+, =, -)    | 0.07                  | 630       | 2,118        |
| Israel         | 38.3%                   | (=, =, =)    | -0.01                 | 331       | 1,032        |
| Canada         | 42.1%                   | (+, =, -)    | -0.04                 | 816       | 2,160        |
| Germany        | 37.6%                   | (+, =, -)    | -0.09                 | 2,498     | 10,438       |
| Australia      | 42.6%                   | (+, =, -)    | -0.10                 | 817       | 3,016        |
| United States  | 42.9%                   | (+, +, -)    | -0.14                 | 8,391     | 33,510       |
| Belgium        | 51.2%                   | (+, =, -)    | -0.16                 | 378       | 1,001        |
| France         | 48.9%                   | (+, =, -)    | -0.17                 | 1,171     | 5,566        |
| United Kingdom | 45.8%                   | (+, +, -)    | -0.18                 | 1,751     | 4,825        |
| Switzerland    | 34.3%                   | (+, =, -)    | -0.26                 | 560       | 1,659        |
| Poland         | 54.2%                   | (=, +, -)    | -0.39                 | 257       | 967          |
| Italy          | 54.2%                   | (=, +, -)    | -0.46                 | 1,269     | 6,455        |
| Spain          | 48.8%                   | (=, +, -)    | -0.50                 | 711       | 3,073        |
| Japan          | 25.3%                   | (+, +, -)    | -0.51                 | 1,564     | 8,126        |
| Austria        | 38.6%                   | (+, +, -)    | -0.58                 | 475       | 1,760        |

**Table 2: Journal Classification.** Journals are descendingly ordered by their *Prestige Index*.

| Journal Name                                   | Mean Impact Factor 2008-2016 | Female Authorship Ratio | FAOR-triplet | Prestige Index | #Articles | #Authorships |
|------------------------------------------------|------------------------------|-------------------------|--------------|----------------|-----------|--------------|
| Contact Dermatitis                             | 3.85                         | 49.5%                   | (+, -, =)    | 0.19           | 721       | 3,623        |
| Acta Dermato-Venereologica                     | 3.27                         | 47.4%                   | (+, =, -)    | 0.11           | 834       | 4,749        |
| Sexually Transmitted Infections                | 2.88                         | 50.1%                   | (+, =, -)    | 0.06           | 1,110     | 4,369        |
| Wound Repair and Regeneration                  | 2.80                         | 38.1%                   | (+, =, -)    | 0.03           | 847       | 4,354        |
| Journal of Dermatological Science              | 3.54                         | 33.4%                   | (+, =, -)    | 0.03           | 727       | 3,763        |
| Journal of the American Academy of Dermatology | 4.83                         | 44.9%                   | (+, =, -)    | -0.01          | 2,103     | 11,338       |
| Sexually Transmitted Diseases                  | 2.78                         | 53.4%                   | (+, =, -)    | -0.05          | 1,370     | 7,500        |
| Journal of Investigative Dermatology           | 6.26                         | 42.1%                   | (+, =, -)    | -0.06          | 2,392     | 16,865       |
| Lasers in Medical Science                      | 2.29                         | 40.1%                   | (+, =, -)    | -0.1           | 1,550     | 6,130        |
| American Journal of Clinical Dermatology       | 2.16                         | 47.5%                   | (+, =, -)    | -0.13          | 263       | 981          |
| Melanoma Research                              | 2.29                         | 44.6%                   | (+, =, -)    | -0.14          | 616       | 3,845        |
| Dermatologic Surgery                           | 2.04                         | 35.9%                   | (+, =, -)    | -0.16          | 1,715     | 6,473        |
| Archives of Dermatological Research            | 2.19                         | 41.6%                   | (+, =, -)    | -0.16          | 799       | 3,355        |
| Lasers in Surgery and Medicine                 | 2.67                         | 32.9%                   | (+, =, -)    | -0.17          | 938       | 4,161        |
| Pigment Cell & Melanoma Research               | 4.91                         | 42.9%                   | (+, =, -)    | -0.18          | 510       | 3,199        |
| Experimental Dermatology                       | 3.45                         | 41.9%                   | (+, +, -)    | -0.19          | 1,644     | 8,732        |
| International Wound Journal                    | 1.99                         | 37.1%                   | (=, +, -)    | -0.21          | 891       | 3,877        |
| JAMA Dermatology                               | 5.46                         | 47.2%                   | (+, +, -)    | -0.27          | 491       | 3,163        |
| Journal of Dermatological Treatment            | 1.65                         | 45.1%                   | (+, +, -)    | -0.3           | 655       | 2,590        |
| Dermatologic Clinics                           | 1.74                         | 47.3%                   | (+, +, -)    | -0.35          | 569       | 1,205        |
| Clinics In Dermatology                         | 2.40                         | 43.6%                   | (=, +, -)    | -0.39          | 743       | 1,732        |
| Mycoses                                        | 1.81                         | 47.0%                   | (=, +, -)    | -0.41          | 974       | 3,710        |
| Dermatology                                    | 2.06                         | 41.7%                   | (+, +, -)    | -0.5           | 911       | 3,475        |

**Table 3: Synopsis of different subject areas.** In high-quality dermatological research, the integration of female scholars is advanced as compared to other (medical) disciplines. However, in all subject areas, a considerable career dichotomy is still present, with many female researchers at the beginning of their career and few women in academic leadership positions. Please note that the *Nature Index* offers a database for the specific analysis of high impact scientific efforts from the journal categories of multidisciplinary, earth & environmental, life science and physics<sup>46</sup> (physics was excluded from analysis).

| Subject Area                              | FAP   | FAOR First | FAOR Co | FAOR Last | Prestige Index | Female representation at prestigious authorships in |                         | Gender-specific differences in citation rates |
|-------------------------------------------|-------|------------|---------|-----------|----------------|-----------------------------------------------------|-------------------------|-----------------------------------------------|
|                                           |       |            |         |           |                | multi-author articles                               | highest impact journals |                                               |
| <b>Q1 Dermatology</b>                     | 43.0% | 1.41       | 1.07    | 0.60      | -0.11          | Stable                                              | Stable                  | minor                                         |
| <b>Epilepsy<sup>14</sup></b>              | 39.6% | 1.25       | 1.17    | 0.57      | -0.22          | Decline                                             | -                       | major                                         |
| <b>Schizophrenia<sup>12</sup></b>         | 37.6% | 1.30       | 1.20    | 0.57      | -0.22          | Sharp Decline                                       | -                       | major                                         |
| <b>Lung Cancer<sup>22</sup></b>           | 31.3% | 1.22       | 1.19    | 0.59      | -0.22          | Sharp Decline                                       | -                       | minor                                         |
| <b>Nature Index Journals<sup>35</sup></b> | 29.8% | 1.19       | 1.35    | 0.47      | -0.42          | Sharp Decline                                       | Decline                 | major                                         |

## References

1. Sadeghpour M, Bernstein I, Ko C, Jacobe H. Role of sex in academic dermatology: results from a national survey. *Archives of dermatology*. 2012;148(7):809-814.
2. Lautenberger DM, Dandar VM, Raezer CL, Sloane RA. The State of Women in Academic Medicine: The Pipeline and Pathways to Leadership, 2013-2014. 2014; <https://www.aamc.org/members/gwims/statistics/>. Accessed 2016-10-11, 2016.
3. Brooke B. Number of Female Medical School Enrollees Reaches 10-Year High. <https://news.aamc.org/press-releases/article/applicant-enrollment-2016/> 2016. Accessed November 01, 2016
4. Kimball AB. Sex, academics, and dermatology leadership: progress made, but no more excuses. *Archives of dermatology*. 2012;148(7):844-846.
5. Pincus S. Women in academic dermatology. Results of survey from the professors of dermatology. *Archives of dermatology*. 1994;130(9):1131-1135.
6. Jacobson CC, Resneck JS, Jr., Kimball AB. Generational differences in practice patterns of dermatologists in the United States: implications for workforce planning. *Archives of dermatology*. 2004;140(12):1477-1482.
7. Resneck JS, Jr., Tierney EP, Kimball AB. Challenges facing academic dermatology: survey data on the faculty workforce. *Journal of the American Academy of Dermatology*. 2006;54(2):211-216.
8. Turner E, Yoo J, Salter S, Kimball AB. Leadership workforce in academic dermatology. *Archives of dermatology*. 2007;143(7):948-949.
9. Jacobson CC, Nguyen JC, Kimball AB. Gender and parenting significantly affect work hours of recent dermatology program graduates. *Archives of dermatology*. 2004;140(2):191-196.
10. Shi CR, Olbricht S, Vleugels RA, Nambudiri VE. Sex and leadership in academic dermatology: A nationwide survey. *Journal of the American Academy of Dermatology*. 2017;77(4):782-784.
11. Gollins CE, Shipman AR, Murrell DF. A study of the number of female editors-in-chief of dermatology journals. *International journal of women's dermatology*. 2017;3(4):185-188.
12. Bendels MHK, Bauer J, Schoffel N, Groneberg DA. The gender gap in schizophrenia research. *Schizophrenia research*. 2017.
13. Lariviere V, Ni C, Gingras Y, Cronin B, Sugimoto CR. Bibliometrics: global gender disparities in science. *Nature*. 2013;504(7479):211-213.
14. Bendels MHK, Wanke E, Schöffel N, Bauer J, Quarcoo D, Groneberg D. Gender equality in academic research on epilepsy - a study on scientific authorships. *Epilepsia*. 2017.
15. Jagsi R, Guancial EA, Worobey CC, et al. The "gender gap" in authorship of academic medical literature--a 35-year perspective. *The New England journal of medicine*. 2006;355(3):281-287.
16. Marusic A, Bosnjak L, Jeroncic A. A systematic review of research on the meaning, ethics and practices of authorship across scholarly disciplines. *PloS one*. 2011;6(9):e23477.
17. Murphy TF. Authorship and Publication. In: McGee G. *Case Studies in Biomedical Research Ethics*. 1. edition ed: The MIT Press; 2004.
18. Tschardtke T, Hochberg ME, Rand TA, Resh VH, Krauss J. Author sequence and credit for contributions in multiauthored publications. *PLoS Biol*. 2007;5(1):e18.

19. Fadeel B. "But many that are first shall be last; and the last shall be first". *FASEB journal : official publication of the Federation of American Societies for Experimental Biology*. 2009;23(5):1283.
20. Bendels MHK, Brüggmann D, Schöffel N, Groneberg DA. Gendermetrics.NET: a novel software for analyzing the gender representation in scientific authoring. *J Occup Med Toxicol*. 2016;11:43.
21. Filardo G, da Graca B, Sass DM, Pollock BD, Smith EB, Martinez MA. Trends and comparison of female first authorship in high impact medical journals: observational study (1994-2014). *BMJ*. 2016;352:i847.
22. Bendels MHK, Brüggmann D, Schöffel N, Groneberg DA. Gendermetrics of cancer research: results from a global analysis on lung cancer. *Oncotarget*. 2017;8(60):101911-101921.
23. West M, Curtis J. AAUP faculty gender equity indicators 2006. 2006; <https://www.aaup.org/NR/rdonlyres/63396944-44BE-4ABA-9815-5792D93856F1/0/AAUPGenderEquityIndicators2006.pdf>. Accessed 2006.
24. Long MT, Leszczynski A, Thompson KD, Wasan SK, Calderwood AH. Female authorship in major academic gastroenterology journals: a look over 20 years. *Gastrointestinal endoscopy*. 2015;81(6):1440-1447.e1443.
25. Liang T, Zhang C, Khara RM, Harris AC. Assessing the Gap in Female Authorship in Radiology: Trends Over the Past Two Decades. *Journal of the American College of Radiology : JACR*. 2015;12(7):735-741.
26. Amering M, Schrank B, Sibitz I. The gender gap in high-impact psychiatry journals. *Academic medicine : journal of the Association of American Medical Colleges*. 2011;86(8):946-952.
27. Bickel J, Ruffin A. Gender-associated differences in matriculating and graduating medical students. *Academic medicine : journal of the Association of American Medical Colleges*. 1995;70(6):552-559.
28. Ramsden P. Describing and explaining research productivity. *Higher Education*. 1994;28(2):207-226.
29. Cikara M, Rudman L, Fiske S. Dearth by a Thousand Cuts? Accounting for Gender Differences in Top-Ranked Publication Rates in Social Psychology. *The Journal of social issues*. 2012;68(2):263-285.
30. van den Besselaar P, Sandstrom U. Gender differences in research performance and its impact on careers: a longitudinal case study. *Scientometrics*. 2016;106:143-162.
31. West JD, Jacquet J, King MM, Correll SJ, Bergstrom CT. The role of gender in scholarly authorship. *PloS one*. 2013;8(7):e66212.
32. Figg WD, Dunn L, Liewehr DJ, et al. Scientific collaboration results in higher citation rates of published articles. *Pharmacotherapy*. 2006;26(6):759-767.
33. Schisterman EF, Swanson CW, Lu YL, Mumford SL. The changing face of epidemiology: gender disparities in citations? *Epidemiology (Cambridge, Mass.)*. 2016;28(2):159-168.
34. Symonds MR, Gemmell NJ, Braisher TL, Gorringer KL, Elgar MA. Gender differences in publication output: towards an unbiased metric of research performance. *PloS one*. 2006;1:e127.
35. Bendels MHK, Muller R, Brüggmann D, Groneberg DA. Gender disparities in high-quality research revealed by Nature Index journals. *PloS one*. 2018;13(1):e0189136.
36. Garfield E. The evolution of the Science Citation Index. *International microbiology : the official journal of the Spanish Society for Microbiology*. 2007;10(1):65-69.

- 1  
2  
3  
4  
5  
6  
7  
8  
9  
10  
11  
12  
13  
14  
15  
16  
17  
18  
19  
20  
21  
22  
23  
24  
25  
26  
27  
28  
29  
30  
31  
32  
33  
34  
35  
36  
37  
38  
39  
40  
41  
42  
43  
44  
45  
46  
47  
48  
49  
50  
51  
52  
53  
54  
55  
56  
57  
58  
59  
60
- 37.** Reed DA, Enders F, Lindor R, McClees M, Lindor KD. Gender differences in academic productivity and leadership appointments of physicians throughout academic careers. *Academic medicine : journal of the Association of American Medical Colleges*. 2011;86(1):43-47.
- 38.** Brooks J, Della Sala S. Re-addressing gender bias in Cortex publications. *Cortex; a journal devoted to the study of the nervous system and behavior*. 2009;45(10):1126-1137.
- 39.** Neuroscience N. Women in neuroscience: a numbers game. *Nature neuroscience*. 2006;9(7):853.
- 40.** Leopold TA. The Global Gender Gap Report 2016. World Economic Forum. 2016.
- 41.** Iwao S. *The Japanese woman : traditional image and changing reality / Sumiko Iwao*. New York : Toronto : New York: Free Press ; Maxwell Macmillan Canada ; Maxwell Macmillan International; 1993.
- 42.** Childs S, Mona LK. Critical Mass Theory and Women's Political Representation. *Political Studies*. 2008;56(3):725-736.
- 43.** Mueller CM, Gaudilliere DK, Kin C, Menorca R, Girod S. Gender disparities in scholarly productivity of US academic surgeons. *Journal of Surgical Research*. 2016;203(1):28-33.
- 44.** Council GM. *The state of medical education and practice in the UK: 2013*. 2013.
- 45.** Kaufman RR, Chevan J. The gender gap in peer-reviewed publications by physical therapy faculty members: a productivity puzzle. *Physical therapy*. 2011;91(1):122-131.
- 46.** Introducing the Index. *Nature*. 2014;515(7526):S52-53.

## Figure Legends

**Fig 1: Time trend of female authorships on the global level. (A)** The relative frequency of female authorships (FAP, bottom), the pattern of FAORs (with FAOR-triplet, top) and its associated Prestige Index (PI) are depicted by year and averaged over time. The averaged FAOR distribution is characterized by the FAOR-pattern (+, +, -), i.e. women have significantly higher odds for first and co-authorships and significantly lower odds for last-authorships. The slightly negative PI indicates a lack of prestigious authorships held by women. **(B)** The FAP exhibits a relatively high increase as documented by its average annual growth rate (AAGR) of 1.74% per year with the highest rate for last authorships (2.97%). Overall, this led to more gender-neutrality in authorships odds during the recent years.



1  
2  
3 **Fig 2: Female authorships by authors per article.** Although the FAORs for first and last  
4 authorships have the tendency to slightly increase and decrease, respectively, with an  
5 increasing number of authors, this trend is reversed for higher author rates (>12  
6 authors/article). FAP, FAORs and Prestige Index show no clear correlation to the number of  
7 authors per article.  
8  
9  
10  
11  
12  
13  
14  
15  
16  
17  
18  
19  
20  
21  
22  
23  
24  
25  
26  
27  
28  
29  
30  
31  
32  
33  
34  
35  
36  
37  
38  
39  
40  
41  
42  
43  
44  
45  
46  
47  
48  
49  
50  
51  
52  
53  
54  
55  
56  
57  
58  
59  
60

1  
2  
3 **Fig 3: Gender-specificity of citations & scholarly productivity.** (A) The descendingly ordered  
4 citation rates show that articles with male key authorships are slightly more frequently cited  
5 than articles with female key authorships. The mean citation rate of 9.2 citations/article is  
6 depicted by a dotted line (Kruskal-Wallis test, (\*):  $P < .05$  (\*\*):  $P < .01$ ). (B) Average citation  
7 rates of ungrouped articles (bars) and articles that were grouped by the gender of their key  
8 authorships (lines), depicted as a function of the number of authors. Statistically, the citation  
9 rate of an article is higher the more authors are involved. The gender-specific differences in  
10 citation rates are not preserved across the different levels of author count. (C) Gender-  
11 specific distribution of the article count per author. Women dominate the sub-groups  
12 'author has one or two article(s)'. All other sub-groups are characterized by a relatively over-  
13 representation of male authors. This finding correlates with the higher productivity of male  
14 authors, as 52.8% male authors are responsible for 57.0% of all authorships.  
15  
16  
17  
18  
19  
20  
21  
22  
23  
24  
25  
26  
27  
28  
29  
30  
31  
32  
33  
34  
35  
36  
37  
38  
39  
40  
41  
42  
43  
44  
45  
46  
47  
48  
49  
50  
51  
52  
53  
54  
55  
56  
57  
58  
59  
60

1  
2  
3 **Fig 4: Linear projection of the development of female authorships on the global level.** The  
4  
5 prognosis for the next decades forecasts a further harmonization of authorship odds  
6  
7 between the two genders with an almost gender-neutral distribution of prestigious  
8  
9 authorships in 2026 (*Prestige Index* = -0.03). An FAP of 54.3% is prognosticated for the year  
10  
11  
12 2026.  
13  
14  
15  
16  
17  
18  
19  
20  
21  
22  
23  
24  
25  
26  
27  
28  
29  
30  
31  
32  
33  
34  
35  
36  
37  
38  
39  
40  
41  
42  
43  
44  
45  
46  
47  
48  
49  
50  
51  
52  
53  
54  
55  
56  
57  
58  
59  
60



Fig 1: Time trend of female authorships on the global level. (A) The relative frequency of female authorships (FAP, bottom), the pattern of FAORs (with FAOR-triplet, top) and its associated Prestige Index (PI) are depicted by year and averaged over time. The averaged FAOR distribution is characterized by the FAOR-pattern (+, +, -), i.e. women have significantly higher odds for first and co-authorships and significantly lower odds for last-authorships. The slightly negative PI indicates a lack of prestigious authorships held by women. (B) The FAP exhibits a relatively high increase as documented by its average annual growth rate (AAGR) of 1.74% per year with the highest rate for last authorships (2.97%). Overall, this led to more gender-neutrality in authorships odds during the recent years.

160x74mm (300 x 300 DPI)



Fig 2: Female authorships by authors per article. Although the FAORs for first and last authorships have the tendency to slightly increase and decrease, respectively, with an increasing number of authors, this trend is reversed for higher author rates (>12 authors/article). FAP, FAORs and Prestige Index show no clear correlation to the number of authors per article.

98x74mm (300 x 300 DPI)



Fig 3: Gender-specificity of citations & scholarly productivity. (A) The descendingly ordered citation rates show that articles with male key authorships are slightly more frequently cited than articles with female key authorships. The mean citation rate of 9.2 citations/article is depicted by a dotted line (Kruskal-Wallis test, (\*):  $P < .05$  (\*\*):  $P < .01$ ). (B) Average citation rates of ungrouped articles (bars) and articles that were grouped by the gender of their key authorships (lines), depicted as a function of the number of authors. Statistically, the citation rate of an article is higher the more authors are involved. The gender-specific differences in citation rates are not preserved across the different levels of author count. (C) Gender-specific distribution of the article count per author. Women dominate the sub-groups 'author has one or two article(s)'. All other sub-groups are characterized by a relatively over-representation of male authors. This finding correlates with the higher productivity of male authors, as 52.8% male authors are responsible for 57.0% of all authorships.

38x20mm (300 x 300 DPI)



Fig 4: Linear projection of the development of female authorships on the global level. The prognosis for the next decades forecasts a further harmonization of authorship odds between the two genders with an almost gender-neutral distribution of prestigious authorships in 2026 (Prestige Index = -0.03). An FAP of 54.3% is prognosticated for the year 2026.

59x74mm (300 x 300 DPI)

## Online Supplement

# Gender disparities in high-quality dermatology research - a study on scientific authorships

Michael H. K. Bendels<sup>1</sup>, Michelle C. Dietz<sup>1</sup>, Dörthe Brüggmann<sup>1</sup>, Gerhard M. Oremek<sup>1</sup>, Norman Schöffel\*<sup>1</sup>, and David A. Groneberg\*<sup>1</sup>

<sup>1</sup>Division of Computational Medicine, Institute of Occupational, Social, and Environmental Medicine, Goethe University Frankfurt, Germany

### Correspondence:

Dr. med. Dr. rer. nat. Michael H.K. Bendels, MD, PhD

### Postal Address:

Theodor-Stern-Kai 7

60590 Frankfurt

Germany

Phone: +49-69-6301-6650

Fax: +49-69-6301-7053

email: michael.bendels@outlook.com

[www.asu.med.uni-frankfurt.de](http://www.asu.med.uni-frankfurt.de)

### Content:

**SFig 1: Gender Detection Output by Time.**

**SFig 2: Quality of algorithmic gender detection by country.**

**SFig 3: Bibliometric overview.**

**SFig 4: Test for alphabetical ordering of the author list.**

**SFig 5: Probability density function of the citation rate.**



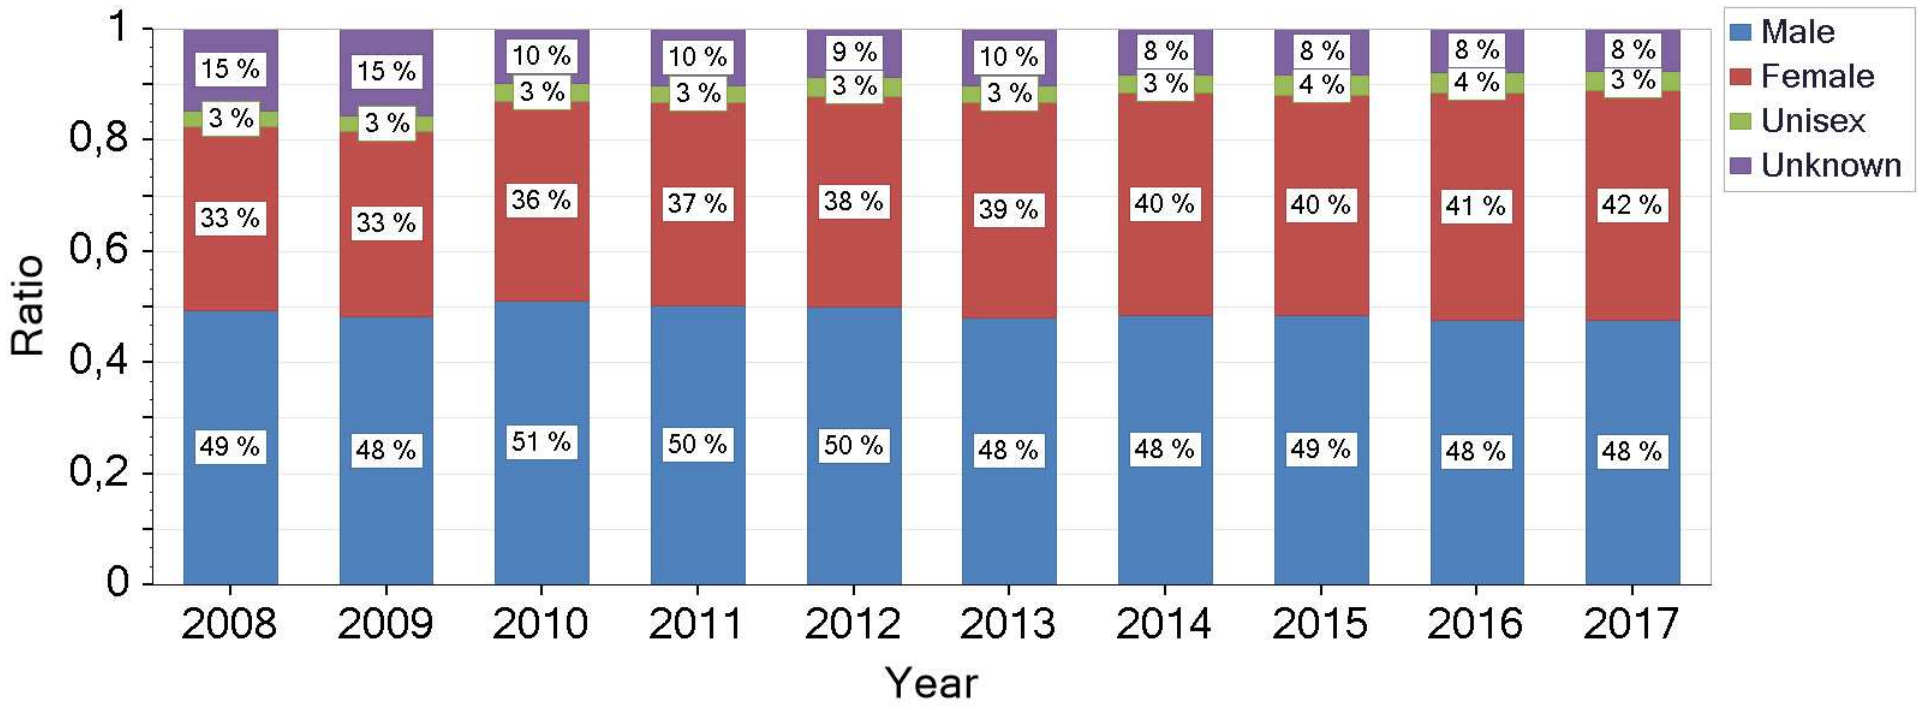

**SFig 1: Gender Detection Output by Time.** The ratios of detected male, female, unisex and undefined authorships ordered by publication year document a relatively small inter-annual variability.

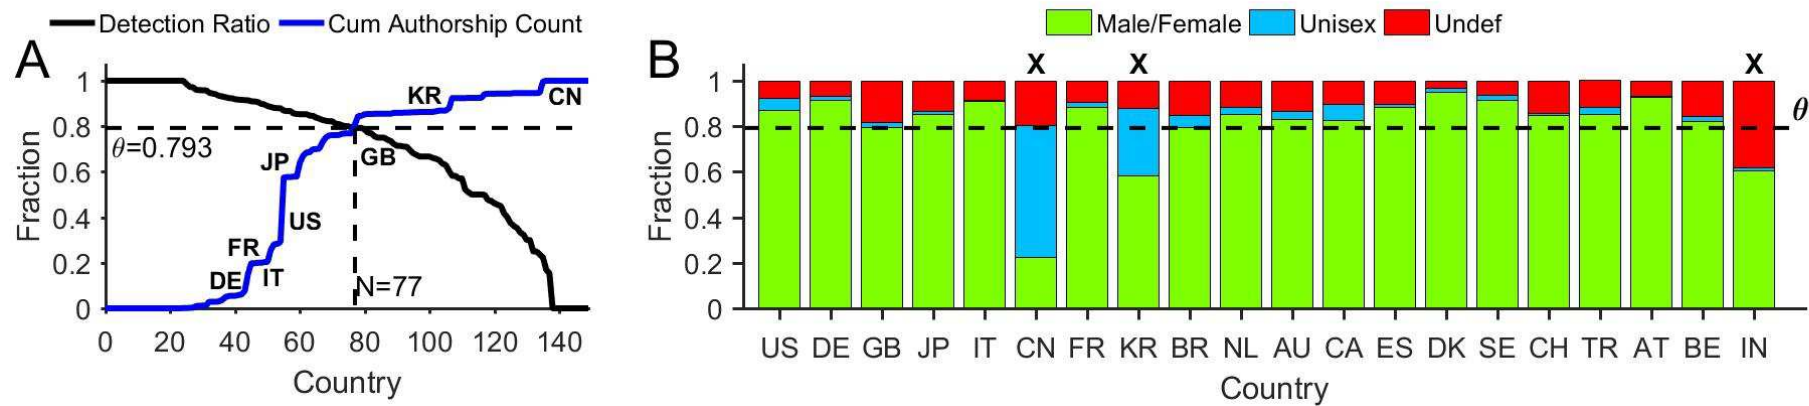

**SFig 2: Quality of algorithmic gender detection by country.** (A) An adaptive threshold country criterion  $\theta$  for the inclusion of a country in the country-specific gender analysis was defined by a ROC-like curve incorporating both detection ratio and cumulative author count [1]. In this study, countries with a detection rate of at least  $\theta = 0.793$  male + female authors (i.e. 79.3% of all authorships) from N=77 countries were included in the country-specific analysis. Countries with a large amount of authors are indicated by country code. (B) The result of the algorithmic gender detection - classified as male/female, unisex or undefined - grouped by countries that are ordered in descending order by their publication count, documents a relative high frequency of male/female authors for most of the top 20 countries, with the exception of the Asian countries China (CN), South Korea (KR), and India (IN). The latter countries are characterized by a high frequency of unisex (CH, KR) or unknown names (IN) and are excluded (X) from analysis due to the threshold criterion  $\theta$  (dotted line). AU=Australia, AT=Austria, BE=Belgium, BR=Brazil, CA=Canada, CH=Switzerland, CN=China, DE=Germany, DK=Denmark, ES=Spain, FR=France, GB=United Kingdom, IL=Israel, IN=India, IT=Italy, JP=Japan, KR=South Korea, NL=Netherlands, SG=Singapore, SE=Sweden, TR=Turkey, US=United States.

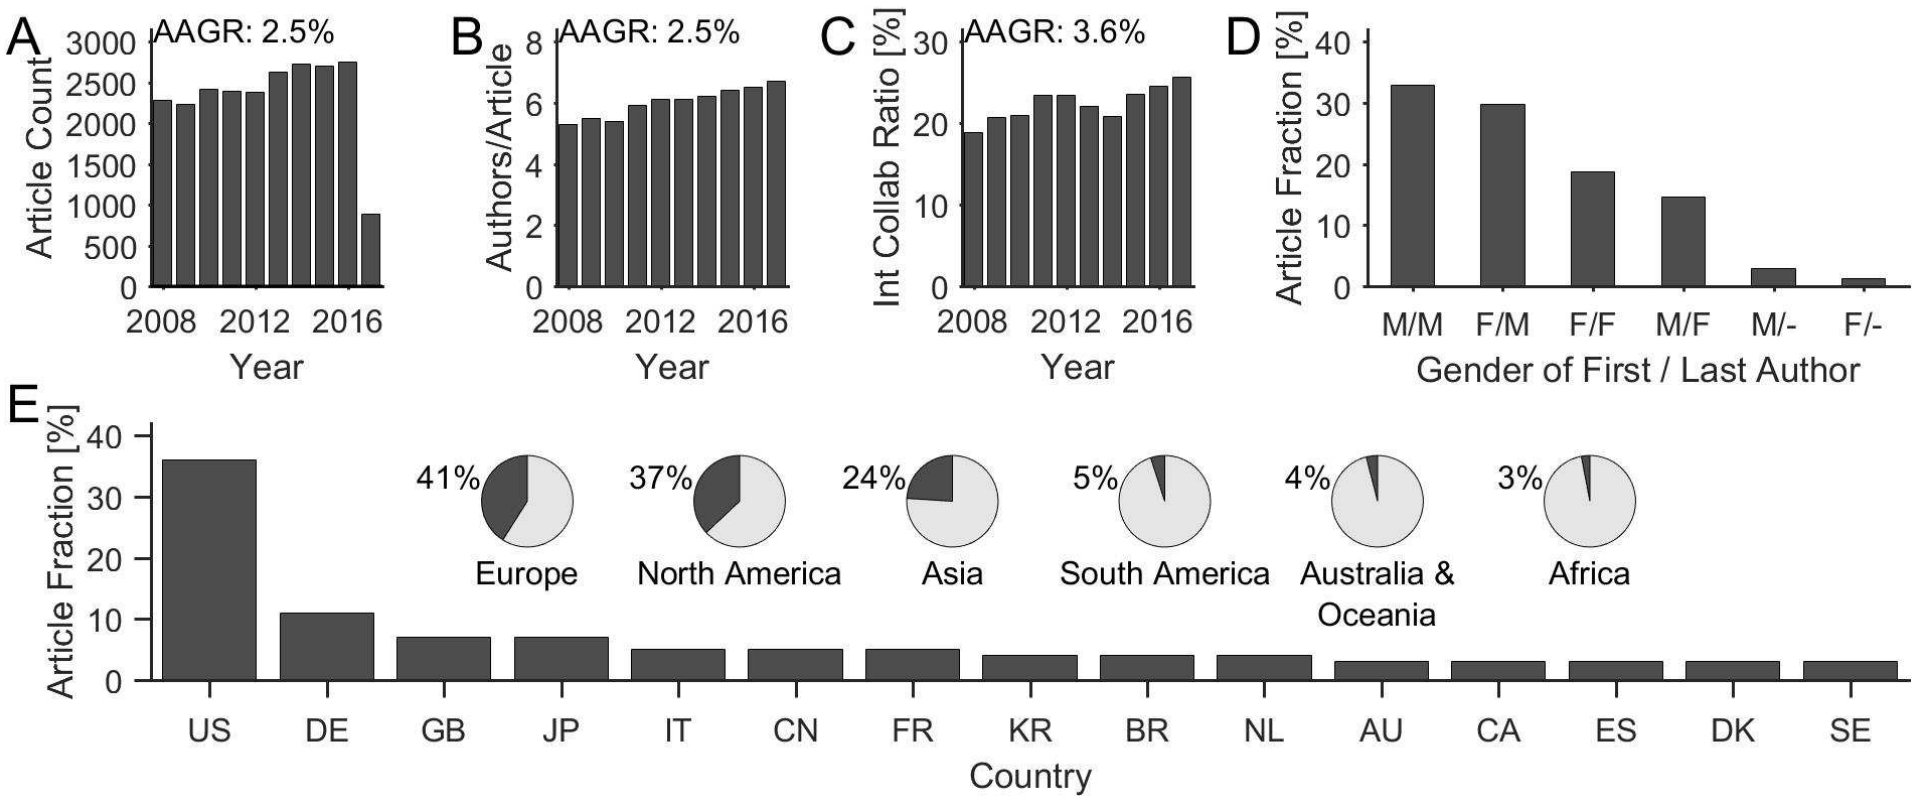

**SFig 3: Bibliometric overview.** (A) The article count increases from 2,281 in 2008 to 2,750 in 2015; the average annual growth rate (AAGR) is 2.5%. (B) The number of authors per article increases from 5.3 authors/article in 2008 to 6.7 authors/article in 2017. (C) The percentage of international collaboration articles increases from 18.9% in 2008 to 25.6% in 2017 with an AAGR of 3.6%. (D) The fraction of articles grouped the gender of their key authors' documents a quantitative superiority of articles with male last authorships. (E) The fraction of articles is depicted by country (bar plot) and by continent (pie charts). Please note that the sum of percentages is greater than one due to international collaborations. AU=Australia, BR=Brazil, CA=Canada, CH=Switzerland, CN=China, DE=Germany, DK=Denmark, ES=Spain, FR=France, GB=United Kingdom, IT=Italy, KR=South Korea, NL=Netherlands, SE=Sweden, US=United States.

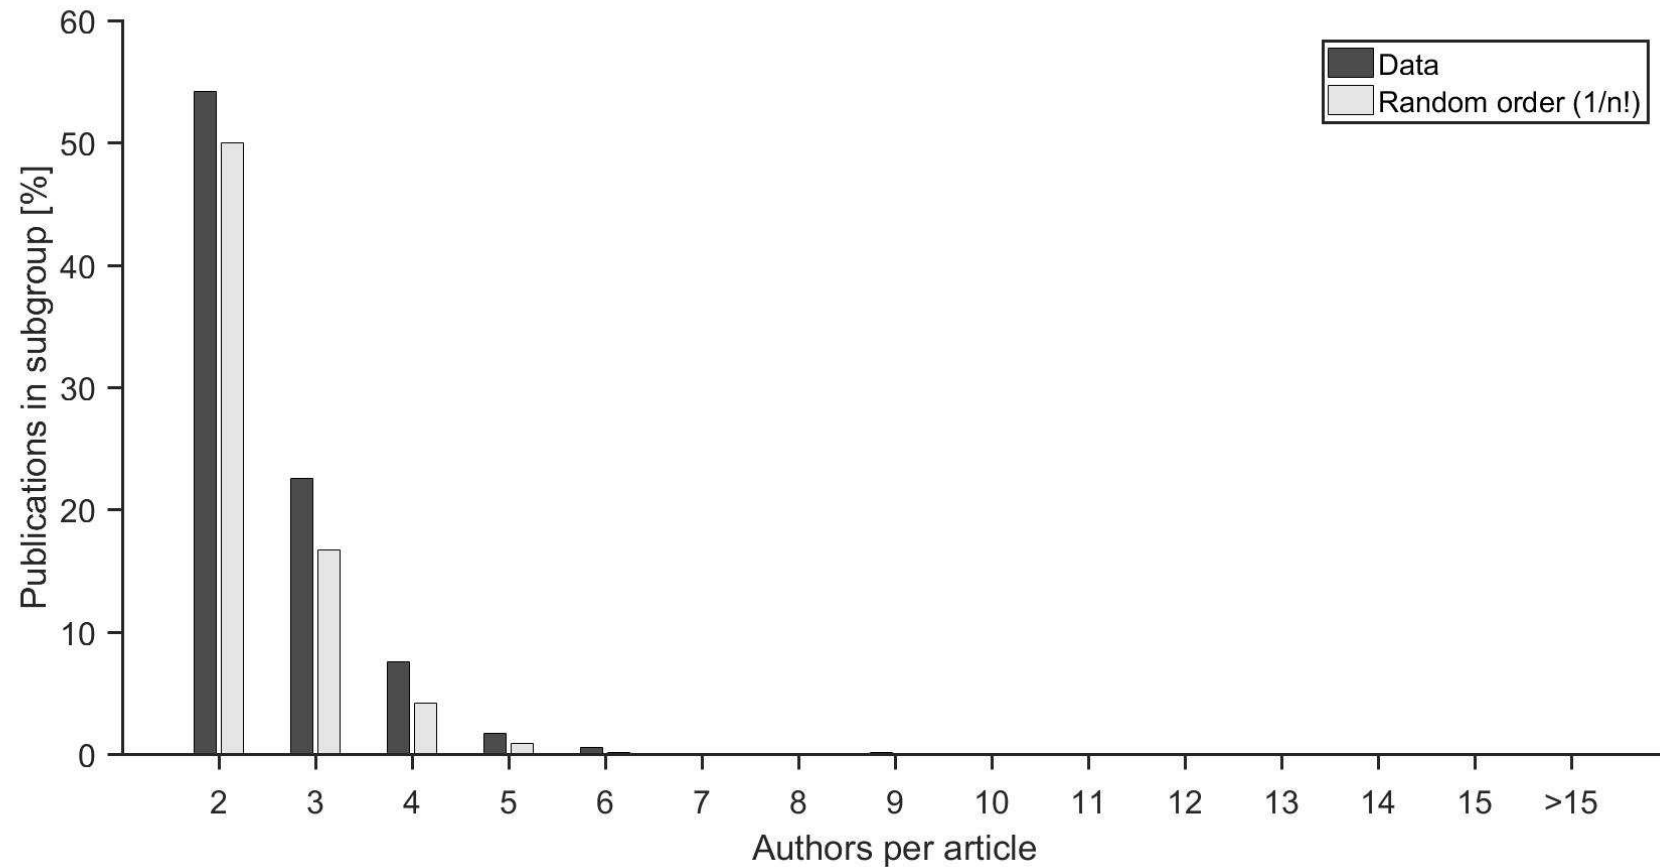

**SFig 4: Test for alphabetical ordering of the author list.** The proportion of publications with an alphabetic ordered author list is depicted with respect to the authors per article (blue). The values correspond very closely to those obtained for randomly ordered author lists (yellow).

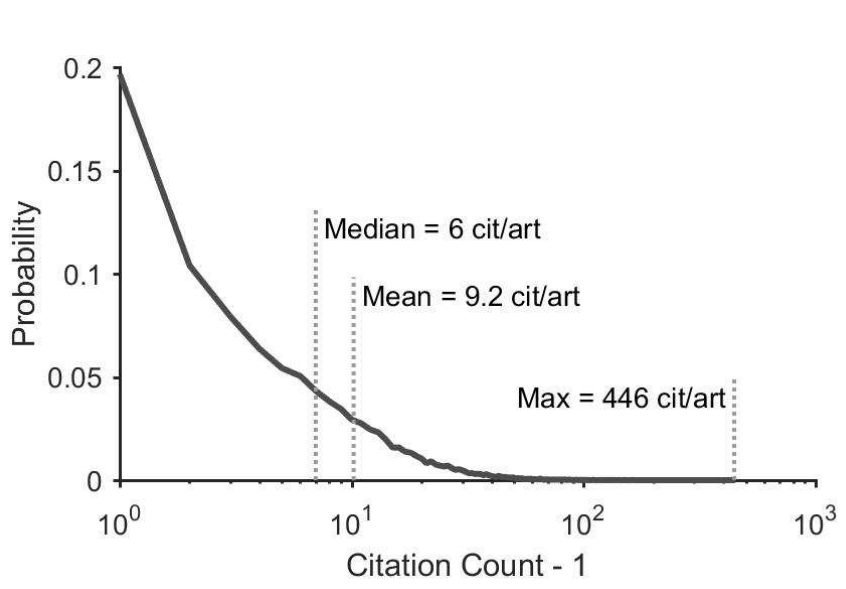

**Sfig 5: Probability density function of the citation rate.** The semi-logarithmic plot of the citation count per article (=citation rate) exhibits an exponential-like decreasing probability density function with a mean citation rate of 9.2 citations/article.

PREVIEW ONLY

## References

1. Bendels MHK, Brüggmann D, Schöffel N, Groneberg DA. Gendermetrics.NET: a novel software for analyzing the gender representation in scientific authoring. *J Occup Med Toxicol.* 2016;11:43.

For peer review only
